# Supplementary material for: Identifying artificial selection signals in the chicken genome
Source: PLoS One. 2018 Apr 26;13(4):e0196215. doi: 10.1371/journal.pone.0196215 (PMC5919632; doi:10.1371/journal.pone.0196215)
Supplement: S3 Table — (XLSX) [file pone.0196215.s010.xlsx]

## Sheet: AR_VO
BP:
Category	Term	Count	%	PValue	Genes	List Total	Pop Hits	Pop Total	Fold Enrichment	Bonferroni	Benjamini	FDR
GOTERM_BP_FAT	GO:0034374~low-density lipoprotein particle remodeling	4	0.665557	0.00215586	ENSG00000160179, ENSG00000084674, ENSG00000144891, ENSG00000087237	420	9	13528	14.3153	0.990711	0.990711	3.67628
GOTERM_BP_FAT	GO:0016311~dephosphorylation	12	1.99667	0.00845981	ENSG00000139304, ENSG00000171791, ENSG00000156194, ENSG00000188716, ENSG00000152894, ENSG00000143727, ENSG00000079393, ENSG00000063601, ENSG00000117600, ENSG00000100034, ENSG00000112679, ENSG00000087053	420	154	13528	2.50983	1	0.9999	13.7091
GOTERM_BP_FAT	GO:0010939~regulation of necrotic cell death	3	0.499168	0.00899432	ENSG00000151729, ENSG00000026103, ENSG00000137275	420	5	13528	19.3257	1	0.99854	14.5128
GOTERM_BP_FAT	GO:0001944~vasculature development	16	2.66223	0.0116462	ENSG00000111145, ENSG00000112531, ENSG00000121075, ENSG00000169946, ENSG00000107562, ENSG00000111241, ENSG00000084674, ENSG00000125266, ENSG00000154188, ENSG00000115053, ENSG00000166224, ENSG00000185215, ENSG00000112769, ENSG00000138639, ENSG00000164442, ENSG00000164107	420	251	13528	2.0532	1	0.998252	18.3973
GOTERM_BP_FAT	GO:0048514~blood vessel morphogenesis	14	2.32945	0.0143958	ENSG00000111145, ENSG00000112531, ENSG00000121075, ENSG00000169946, ENSG00000107562, ENSG00000111241, ENSG00000084674, ENSG00000154188, ENSG00000115053, ENSG00000166224, ENSG00000185215, ENSG00000138639, ENSG00000164442, ENSG00000164107	420	211	13528	2.13712	1	0.99814	22.2488
GOTERM_BP_FAT	GO:0051402~neuron apoptosis	4	0.665557	0.0197691	ENSG00000164418, ENSG00000171791, ENSG00000164305, ENSG00000174405	420	19	13528	6.78095	1	0.999264	29.2863
GOTERM_BP_FAT	GO:0006839~mitochondrial transport	7	1.16473	0.0197893	ENSG00000146267, ENSG00000171791, ENSG00000198954, ENSG00000100300, ENSG00000173726, ENSG00000072756, ENSG00000174032	420	69	13528	3.26763	1	0.997951	29.3117
GOTERM_BP_FAT	GO:0001568~blood vessel development	15	2.49584	0.0205818	ENSG00000111145, ENSG00000112531, ENSG00000121075, ENSG00000169946, ENSG00000107562, ENSG00000111241, ENSG00000084674, ENSG00000154188, ENSG00000115053, ENSG00000166224, ENSG00000185215, ENSG00000112769, ENSG00000138639, ENSG00000164442, ENSG00000164107	420	245	13528	1.97201	1	0.996432	30.2969
GOTERM_BP_FAT	GO:0051301~cell division	17	2.82862	0.0215902	ENSG00000118971, ENSG00000184486, ENSG00000102981, ENSG00000074054, ENSG00000119397, ENSG00000137601, ENSG00000184702, ENSG00000155111, ENSG00000153207, ENSG00000168438, ENSG00000147202, ENSG00000149948, ENSG00000137804, ENSG00000140854, ENSG00000174405, ENSG00000198783, ENSG00000104147	420	295	13528	1.85614	1	0.994793	31.5321
GOTERM_BP_FAT	GO:0006470~protein amino acid dephosphorylation	10	1.66389	0.0225201	ENSG00000139304, ENSG00000171791, ENSG00000156194, ENSG00000188716, ENSG00000152894, ENSG00000143727, ENSG00000079393, ENSG00000100034, ENSG00000112679, ENSG00000087053	420	133	13528	2.42177	1	0.992832	32.6527
GOTERM_BP_FAT	GO:0034368~protein-lipid complex remodeling	4	0.665557	0.0227348	ENSG00000160179, ENSG00000084674, ENSG00000144891, ENSG00000087237	420	20	13528	6.4419	1	0.989247	32.9089
GOTERM_BP_FAT	GO:0034369~plasma lipoprotein particle remodeling	4	0.665557	0.0227348	ENSG00000160179, ENSG00000084674, ENSG00000144891, ENSG00000087237	420	20	13528	6.4419	1	0.989247	32.9089
GOTERM_BP_FAT	GO:0034367~macromolecular complex remodeling	4	0.665557	0.0227348	ENSG00000160179, ENSG00000084674, ENSG00000144891, ENSG00000087237	420	20	13528	6.4419	1	0.989247	32.9089
GOTERM_BP_FAT	GO:0006220~pyrimidine nucleotide metabolic process	5	0.831947	0.0244504	ENSG00000205309, ENSG00000129187, ENSG00000188641, ENSG00000102218, ENSG00000156136	420	36	13528	4.47354	1	0.988579	34.9239
GOTERM_BP_FAT	GO:0009077~histidine family amino acid catabolic process	3	0.499168	0.0298277	ENSG00000156869, ENSG00000139344, ENSG00000084110	420	9	13528	10.7365	1	0.993591	40.8764
GOTERM_BP_FAT	GO:0006548~histidine catabolic process	3	0.499168	0.0298277	ENSG00000156869, ENSG00000139344, ENSG00000084110	420	9	13528	10.7365	1	0.993591	40.8764
GOTERM_BP_FAT	GO:0015031~protein transport	34	5.65724	0.0318447	ENSG00000112685, ENSG00000160179, ENSG00000173726, ENSG00000084674, ENSG00000128731, ENSG00000119396, ENSG00000056972, ENSG00000009844, ENSG00000092108, ENSG00000146267, ENSG00000134265, ENSG00000122958, ENSG00000138750, ENSG00000109762, ENSG00000100030, ENSG00000080371, ENSG00000102245, ENSG00000198301, ENSG00000140854, ENSG00000146955, ENSG00000198707, ENSG00000034693, ENSG00000175416, ENSG0000…	420	762	13528	1.43717	1	0.99334	42.9738
GOTERM_BP_FAT	GO:0045184~establishment of protein localization	34	5.65724	0.0362617	ENSG00000112685, ENSG00000160179, ENSG00000173726, ENSG00000084674, ENSG00000128731, ENSG00000119396, ENSG00000056972, ENSG00000009844, ENSG00000092108, ENSG00000146267, ENSG00000134265, ENSG00000122958, ENSG00000138750, ENSG00000109762, ENSG00000100030, ENSG00000080371, ENSG00000102245, ENSG00000198301, ENSG00000140854, ENSG00000146955, ENSG00000198707, ENSG00000034693, ENSG00000175416, ENSG0000…	420	769	13528	1.42409	1	0.995197	47.3245
GOTERM_BP_FAT	GO:0001101~response to acid	4	0.665557	0.0368689	ENSG00000148180, ENSG00000171791, ENSG00000133027, ENSG00000108443	420	24	13528	5.36825	1	0.993843	47.8975
GOTERM_BP_FAT	GO:0010743~regulation of foam cell differentiation	4	0.665557	0.0409625	ENSG00000160179, ENSG00000084674, ENSG00000144891, ENSG00000087237	420	25	13528	5.15352	1	0.995175	51.6101
GOTERM_BP_FAT	GO:0008610~lipid biosynthetic process	17	2.82862	0.0441247	ENSG00000112531, ENSG00000100243, ENSG00000111144, ENSG00000115112, ENSG00000156671, ENSG00000148488, ENSG00000100294, ENSG00000138135, ENSG00000059377, ENSG00000147571, ENSG00000139163, ENSG00000137869, ENSG00000111728, ENSG00000111726, ENSG00000128274, ENSG00000197563, ENSG00000133027	420	323	13528	1.69524	1	0.99564	54.3058
GOTERM_BP_FAT	GO:0001701~in utero embryonic development	11	1.83028	0.0473607	ENSG00000141030, ENSG00000169946, ENSG00000169762, ENSG00000106804, ENSG00000084674, ENSG00000152944, ENSG00000174405, ENSG00000092140, ENSG00000198783, ENSG00000164442, ENSG00000164107	420	176	13528	2.0131	1	0.996059	56.9174
GOTERM_BP_FAT	GO:0045471~response to ethanol	6	0.998336	0.0478394	ENSG00000010810, ENSG00000148180, ENSG00000118971, ENSG00000171791, ENSG00000133027, ENSG00000108443	420	64	13528	3.01964	1	0.995077	57.2916
GOTERM_BP_FAT	GO:0014910~regulation of smooth muscle cell migration	3	0.499168	0.0514486	ENSG00000171791, ENSG00000173334, ENSG00000108443	420	12	13528	8.05238	1	0.995716	60.0158
GOTERM_BP_FAT	GO:0009075~histidine family amino acid metabolic process	3	0.499168	0.0514486	ENSG00000156869, ENSG00000139344, ENSG00000084110	420	12	13528	8.05238	1	0.995716	60.0158
GOTERM_BP_FAT	GO:0006547~histidine metabolic process	3	0.499168	0.0514486	ENSG00000156869, ENSG00000139344, ENSG00000084110	420	12	13528	8.05238	1	0.995716	60.0158
GOTERM_BP_FAT	GO:0008104~protein localization	37	6.15641	0.0539387	ENSG00000112685, ENSG00000160179, ENSG00000152894, ENSG00000122862, ENSG00000173726, ENSG00000084674, ENSG00000128731, ENSG00000119396, ENSG00000056972, ENSG00000009844, ENSG00000092108, ENSG00000146267, ENSG00000134265, ENSG00000122958, ENSG00000138750, ENSG00000109762, ENSG00000100030, ENSG00000080371, ENSG00000102245, ENSG00000140854, ENSG00000198301, ENSG00000146955, ENSG00000198707, ENSG0000…	420	882	13528	1.35119	1	0.995764	61.7988
GOTERM_BP_FAT	GO:0006915~apoptosis	27	4.49251	0.0548794	ENSG00000107731, ENSG00000122862, ENSG00000026103, ENSG00000100034, ENSG00000113761, ENSG00000056972, ENSG00000129675, ENSG00000178662, ENSG00000171791, ENSG00000005194, ENSG00000164543, ENSG00000174405, ENSG00000164107, ENSG00000136531, ENSG00000056558, ENSG00000164305, ENSG00000112679, ENSG00000092140, ENSG00000169857, ENSG00000164418, ENSG00000166224, ENSG00000148180, ENSG00000115760, ENSG0000…	420	602	13528	1.44461	1	0.995109	62.4528
GOTERM_BP_FAT	GO:0008543~fibroblast growth factor receptor signaling pathway	4	0.665557	0.0594892	ENSG00000118972, ENSG00000160867, ENSG00000111241, ENSG00000166037	420	29	13528	4.44269	1	0.996075	65.5074
GOTERM_BP_FAT	GO:0006865~amino acid transport	7	1.16473	0.0603935	ENSG00000111181, ENSG00000003989, ENSG00000151729, ENSG00000112394, ENSG00000180773, ENSG00000004809, ENSG00000169507	420	90	13528	2.50519	1	0.995493	66.0785
GOTERM_BP_FAT	GO:0012501~programmed cell death	27	4.49251	0.0635055	ENSG00000107731, ENSG00000122862, ENSG00000026103, ENSG00000100034, ENSG00000113761, ENSG00000056972, ENSG00000129675, ENSG00000178662, ENSG00000171791, ENSG00000005194, ENSG00000164543, ENSG00000174405, ENSG00000164107, ENSG00000136531, ENSG00000056558, ENSG00000164305, ENSG00000112679, ENSG00000092140, ENSG00000169857, ENSG00000164418, ENSG00000166224, ENSG00000148180, ENSG00000115760, ENSG0000…	420	611	13528	1.42333	1	0.995793	67.9764
GOTERM_BP_FAT	GO:0002377~immunoglobulin production	4	0.665557	0.0646386	ENSG00000026103, ENSG00000102245, ENSG00000056972, ENSG00000174405	420	30	13528	4.2946	1	0.995325	68.6423
GOTERM_BP_FAT	GO:0009247~glycolipid biosynthetic process	3	0.499168	0.0681294	ENSG00000111728, ENSG00000148488, ENSG00000128274	420	14	13528	6.90204	1	0.995761	70.6125
GOTERM_BP_FAT	GO:0030279~negative regulation of ossification	3	0.499168	0.0681294	ENSG00000118972, ENSG00000171791, ENSG00000122862	420	14	13528	6.90204	1	0.995761	70.6125
GOTERM_BP_FAT	GO:0002440~production of molecular mediator of immune response	4	0.665557	0.0699859	ENSG00000026103, ENSG00000102245, ENSG00000056972, ENSG00000174405	420	31	13528	4.15607	1	0.995591	71.6121
GOTERM_BP_FAT	GO:0045944~positive regulation of transcription from RNA polymerase II promoter	18	2.99501	0.0704587	ENSG00000108510, ENSG00000169946, ENSG00000184486, ENSG00000188342, ENSG00000134532, ENSG00000196591, ENSG00000083635, ENSG00000111049, ENSG00000119508, ENSG00000178662, ENSG00000170681, ENSG00000174429, ENSG00000164104, ENSG00000152944, ENSG00000184384, ENSG00000164442, ENSG00000164107, ENSG00000198791	420	371	13528	1.56273	1	0.994908	71.8616
GOTERM_BP_FAT	GO:0045941~positive regulation of transcription	25	4.15973	0.0723653	ENSG00000108510, ENSG00000168556, ENSG00000169946, ENSG00000184486, ENSG00000073614, ENSG00000188342, ENSG00000134532, ENSG00000196591, ENSG00000083635, ENSG00000111046, ENSG00000111049, ENSG00000119508, ENSG00000178662, ENSG00000156650, ENSG00000100030, ENSG00000165671, ENSG00000170681, ENSG00000174429, ENSG00000164104, ENSG00000152944, ENSG00000184384, ENSG00000166228, ENSG00000198791, ENSG0000…	420	564	13528	1.42773	1	0.99477	72.8466
GOTERM_BP_FAT	GO:0015837~amine transport	8	1.33111	0.0738448	ENSG00000111181, ENSG00000003989, ENSG00000151729, ENSG00000112394, ENSG00000180773, ENSG00000184984, ENSG00000004809, ENSG00000169507	420	118	13528	2.1837	1	0.994469	73.5885
GOTERM_BP_FAT	GO:0045935~positive regulation of nucleobase, nucleoside, nucleotide and nucleic acid metabolic process	27	4.49251	0.0768477	ENSG00000168556, ENSG00000169946, ENSG00000184486, ENSG00000083635, ENSG00000111046, ENSG00000111049, ENSG00000119508, ENSG00000087206, ENSG00000178662, ENSG00000100030, ENSG00000170681, ENSG00000164104, ENSG00000198791, ENSG00000164107, ENSG00000164442, ENSG00000108510, ENSG00000049130, ENSG00000073614, ENSG00000188342, ENSG00000134532, ENSG00000196591, ENSG00000156650, ENSG00000165671, ENSG0000…	420	624	13528	1.39368	1	0.994769	75.0359
GOTERM_BP_FAT	GO:0001662~behavioral fear response	3	0.499168	0.0770462	ENSG00000164418, ENSG00000171791, ENSG00000186297	420	15	13528	6.4419	1	0.993978	75.1289
GOTERM_BP_FAT	GO:0002209~behavioral defense response	3	0.499168	0.0770462	ENSG00000164418, ENSG00000171791, ENSG00000186297	420	15	13528	6.4419	1	0.993978	75.1289
GOTERM_BP_FAT	GO:0006811~ion transport	32	5.32446	0.0782577	ENSG00000137266, ENSG00000151729, ENSG00000110218, ENSG00000171596, ENSG00000171126, ENSG00000180332, ENSG00000162687, ENSG00000139155, ENSG00000065923, ENSG00000173214, ENSG00000153253, ENSG00000104321, ENSG00000136531, ENSG00000170745, ENSG00000198838, ENSG00000182674, ENSG00000109572, ENSG00000107147, ENSG00000186297, ENSG00000138495, ENSG00000010810, ENSG00000164418, ENSG00000165637, ENSG0000…	420	768	13528	1.34206	1	0.993576	75.6895
GOTERM_BP_FAT	GO:0006576~biogenic amine metabolic process	7	1.16473	0.0804475	ENSG00000074317, ENSG00000139163, ENSG00000139287, ENSG00000123505, ENSG00000164303, ENSG00000133027, ENSG00000087237	420	97	13528	2.3244	1	0.993595	76.6726
GOTERM_BP_FAT	GO:0033365~protein localization in organelle	9	1.4975	0.084038	ENSG00000146267, ENSG00000100300, ENSG00000122862, ENSG00000173726, ENSG00000166037, ENSG00000100030, ENSG00000136152, ENSG00000174429, ENSG00000072756	420	146	13528	1.98552	1	0.994163	78.2039
GOTERM_BP_FAT	GO:0046467~membrane lipid biosynthetic process	4	0.665557	0.0871613	ENSG00000111728, ENSG00000148488, ENSG00000156671, ENSG00000128274	420	34	13528	3.78936	1	0.9945	79.4584
GOTERM_BP_FAT	GO:0042439~ethanolamine and derivative metabolic process	4	0.665557	0.0871613	ENSG00000139163, ENSG00000164303, ENSG00000133027, ENSG00000087237	420	34	13528	3.78936	1	0.9945	79.4584
GOTERM_BP_FAT	GO:0070585~protein localization in mitochondrion	4	0.665557	0.0871613	ENSG00000146267, ENSG00000100300, ENSG00000173726, ENSG00000072756	420	34	13528	3.78936	1	0.9945	79.4584
GOTERM_BP_FAT	GO:0006626~protein targeting to mitochondrion	4	0.665557	0.0871613	ENSG00000146267, ENSG00000100300, ENSG00000173726, ENSG00000072756	420	34	13528	3.78936	1	0.9945	79.4584
GOTERM_BP_FAT	GO:0001525~angiogenesis	9	1.4975	0.0892346	ENSG00000111145, ENSG00000115053, ENSG00000121075, ENSG00000107562, ENSG00000111241, ENSG00000185215, ENSG00000138639, ENSG00000154188, ENSG00000164107	420	148	13528	1.95869	1	0.994461	80.2532
GOTERM_BP_FAT	GO:0045636~positive regulation of melanocyte differentiation	2	0.332779	0.0900766	ENSG00000171791, ENSG00000049130	420	3	13528	21.473	1	0.994001	80.5677
GOTERM_BP_FAT	GO:0050942~positive regulation of pigment cell differentiation	2	0.332779	0.0900766	ENSG00000171791, ENSG00000049130	420	3	13528	21.473	1	0.994001	80.5677
GOTERM_BP_FAT	GO:0048643~positive regulation of skeletal muscle tissue development	2	0.332779	0.0900766	ENSG00000171791, ENSG00000108443	420	3	13528	21.473	1	0.994001	80.5677
GOTERM_BP_FAT	GO:0046700~heterocycle catabolic process	6	0.998336	0.0902346	ENSG00000106605, ENSG00000156869, ENSG00000205309, ENSG00000139344, ENSG00000188641, ENSG00000084110	420	77	13528	2.50983	1	0.993266	80.6262
GOTERM_BP_FAT	GO:0010628~positive regulation of gene expression	25	4.15973	0.0935452	ENSG00000108510, ENSG00000168556, ENSG00000169946, ENSG00000184486, ENSG00000073614, ENSG00000188342, ENSG00000134532, ENSG00000196591, ENSG00000083635, ENSG00000111046, ENSG00000111049, ENSG00000119508, ENSG00000178662, ENSG00000156650, ENSG00000100030, ENSG00000165671, ENSG00000170681, ENSG00000174429, ENSG00000164104, ENSG00000152944, ENSG00000184384, ENSG00000166228, ENSG00000198791, ENSG0000…	420	581	13528	1.38595	1	0.993716	81.814
GOTERM_BP_FAT	GO:0019218~regulation of steroid metabolic process	4	0.665557	0.0994997	ENSG00000160179, ENSG00000084674, ENSG00000144891, ENSG00000163399	420	36	13528	3.57884	1	0.994928	83.7796
Pathway:
Category	Term	Count	%	PValue	Genes	List Total	Pop Hits	Pop Total	Fold Enrichment	Bonferroni	Benjamini	FDR
KEGG_PATHWAY	hsa04080:Neuroactive ligand-receptor interaction	14	2.32945	0.0495183	ENSG00000166603, ENSG00000171596, ENSG00000075073, ENSG00000171860, ENSG00000144891, ENSG00000186297, ENSG00000164418, ENSG00000123901, ENSG00000102239, ENSG00000100300, ENSG00000148734, ENSG00000135577, ENSG00000184984, ENSG00000166206	157	256	5085	1.77125	0.999398	0.999398	45.318
KEGG_PATHWAY	hsa03450:Non-homologous end-joining	3	0.499168	0.0584508	ENSG00000107447, ENSG00000020922, ENSG00000174405	157	13	5085	7.47428	0.999848	0.987682	51.1231
KEGG_PATHWAY	hsa00740:Riboflavin metabolism	3	0.499168	0.0847415	ENSG00000143727, ENSG00000063601, ENSG00000087053	157	16	5085	6.07285	0.999998	0.986558	65.0926

## Sheet: PB
BP:
Category	Term	Count	%	PValue	Genes	List Total	Pop Hits	Pop Total	Fold Enrichment	Bonferroni	Benjamini	FDR
GOTERM_BP_FAT	GO:0006811~ion transport	49	8.05921	3.0019e-05	ENSG00000144746, ENSG00000145864, ENSG00000145863, ENSG00000180332, ENSG00000156486, ENSG00000105929, ENSG00000182866, ENSG00000171714, ENSG00000091664, ENSG00000118507, ENSG00000164707, ENSG00000170745, ENSG00000135902, ENSG00000142185, ENSG00000182674, ENSG00000155097, ENSG00000089060, ENSG00000187446, ENSG00000196811, ENSG00000164418, ENSG00000166558, ENSG00000184261, ENSG00000143153, ENSG0000…	460	768	13528	1.87634	0.0714659	0.0714659	0.0528708
GOTERM_BP_FAT	GO:0015672~monovalent inorganic cation transport	26	4.27632	8.57617e-05	ENSG00000120457, ENSG00000143882, ENSG00000151704, ENSG00000168575, ENSG00000180332, ENSG00000061987, ENSG00000156486, ENSG00000105929, ENSG00000162687, ENSG00000070915, ENSG00000145936, ENSG00000091664, ENSG00000164707, ENSG00000170745, ENSG00000182674, ENSG00000142185, ENSG00000155097, ENSG00000089060, ENSG00000187446, ENSG00000184261, ENSG00000166558, ENSG00000075399, ENSG00000182132, ENSG0000…	460	318	13528	2.40448	0.190906	0.100504	0.150977
GOTERM_BP_FAT	GO:0051259~protein oligomerization	17	2.79605	0.000287071	ENSG00000147647, ENSG00000164494, ENSG00000163145, ENSG00000147601, ENSG00000145863, ENSG00000157764, ENSG00000067057, ENSG00000154188, ENSG00000039068, ENSG00000159461, ENSG00000181163, ENSG00000181092, ENSG00000167772, ENSG00000073282, ENSG00000102878, ENSG00000171848, ENSG00000196365	460	174	13528	2.87326	0.507946	0.210527	0.504523
GOTERM_BP_FAT	GO:0042981~regulation of apoptosis	45	7.40132	0.00113305	ENSG00000106571, ENSG00000142330, ENSG00000114446, ENSG00000064393, ENSG00000157764, ENSG00000145335, ENSG00000121858, ENSG00000153774, ENSG00000057663, ENSG00000170312, ENSG00000165973, ENSG00000181163, ENSG00000182866, ENSG00000137462, ENSG00000134954, ENSG00000116478, ENSG00000167772, ENSG00000181019, ENSG00000095002, ENSG00000118689, ENSG00000050820, ENSG00000101349, ENSG00000163864, ENSG0000…	460	804	13528	1.64601	0.939203	0.503442	1.97739
GOTERM_BP_FAT	GO:0043067~regulation of programmed cell death	45	7.40132	0.00140559	ENSG00000106571, ENSG00000142330, ENSG00000114446, ENSG00000064393, ENSG00000157764, ENSG00000145335, ENSG00000121858, ENSG00000153774, ENSG00000057663, ENSG00000170312, ENSG00000165973, ENSG00000181163, ENSG00000182866, ENSG00000137462, ENSG00000134954, ENSG00000116478, ENSG00000167772, ENSG00000181019, ENSG00000095002, ENSG00000118689, ENSG00000050820, ENSG00000101349, ENSG00000163864, ENSG0000…	460	812	13528	1.62979	0.969015	0.500851	2.44749
GOTERM_BP_FAT	GO:0051260~protein homooligomerization	11	1.80921	0.00140643	ENSG00000147647, ENSG00000039068, ENSG00000163145, ENSG00000147601, ENSG00000181092, ENSG00000167772, ENSG00000102878, ENSG00000073282, ENSG00000196365, ENSG00000067057, ENSG00000154188	460	95	13528	3.40522	0.969079	0.439758	2.44893
GOTERM_BP_FAT	GO:0010941~regulation of cell death	45	7.40132	0.00151082	ENSG00000106571, ENSG00000142330, ENSG00000114446, ENSG00000064393, ENSG00000157764, ENSG00000145335, ENSG00000121858, ENSG00000153774, ENSG00000057663, ENSG00000170312, ENSG00000165973, ENSG00000181163, ENSG00000182866, ENSG00000137462, ENSG00000134954, ENSG00000116478, ENSG00000167772, ENSG00000181019, ENSG00000095002, ENSG00000118689, ENSG00000050820, ENSG00000101349, ENSG00000163864, ENSG0000…	460	815	13528	1.62379	0.976116	0.413455	2.62843
GOTERM_BP_FAT	GO:0055085~transmembrane transport	34	5.59211	0.00189852	ENSG00000143882, ENSG00000018280, ENSG00000146828, ENSG00000157800, ENSG00000117479, ENSG00000186815, ENSG00000061987, ENSG00000156486, ENSG00000105929, ENSG00000070915, ENSG00000133195, ENSG00000197119, ENSG00000157703, ENSG00000099800, ENSG00000100156, ENSG00000164933, ENSG00000092439, ENSG00000114770, ENSG00000091664, ENSG00000164707, ENSG00000170745, ENSG00000182674, ENSG00000142185, ENSG0000…	460	569	13528	1.75729	0.990848	0.443854	3.29235
GOTERM_BP_FAT	GO:0006813~potassium ion transport	14	2.30263	0.0031604	ENSG00000120457, ENSG00000151704, ENSG00000170745, ENSG00000182674, ENSG00000180332, ENSG00000187446, ENSG00000156486, ENSG00000162687, ENSG00000145936, ENSG00000184261, ENSG00000182132, ENSG00000143153, ENSG00000162975, ENSG00000169427	460	160	13528	2.57326	0.999598	0.580515	5.4238
GOTERM_BP_FAT	GO:0006820~anion transport	13	2.13816	0.00345438	ENSG00000070915, ENSG00000164707, ENSG00000105143, ENSG00000100156, ENSG00000115840, ENSG00000144746, ENSG00000018280, ENSG00000022355, ENSG00000168575, ENSG00000145863, ENSG00000114859, ENSG00000147606, ENSG00000113327	460	143	13528	2.67352	0.999806	0.574593	5.91396
GOTERM_BP_FAT	GO:0030029~actin filament-based process	18	2.96053	0.00358262	ENSG00000142330, ENSG00000128340, ENSG00000079819, ENSG00000136167, ENSG00000121853, ENSG00000113916, ENSG00000092529, ENSG00000139132, ENSG00000100311, ENSG00000134318, ENSG00000092439, ENSG00000137877, ENSG00000134516, ENSG00000100266, ENSG00000134324, ENSG00000196405, ENSG00000050820, ENSG00000127831	460	241	13528	2.1965	0.999859	0.553317	6.12704
GOTERM_BP_FAT	GO:0034613~cellular protein localization	26	4.27632	0.00359948	ENSG00000106571, ENSG00000152894, ENSG00000018280, ENSG00000114423, ENSG00000198586, ENSG00000100151, ENSG00000183255, ENSG00000181163, ENSG00000099800, ENSG00000040275, ENSG00000125149, ENSG00000178750, ENSG00000113916, ENSG00000161203, ENSG00000164418, ENSG00000100321, ENSG00000082701, ENSG00000182481, ENSG00000176406, ENSG00000025796, ENSG00000136152, ENSG00000113013, ENSG00000125124, ENSG0000…	460	411	13528	1.8604	0.999865	0.523949	6.15501
GOTERM_BP_FAT	GO:0070727~cellular macromolecule localization	26	4.27632	0.00387746	ENSG00000106571, ENSG00000152894, ENSG00000018280, ENSG00000114423, ENSG00000198586, ENSG00000100151, ENSG00000183255, ENSG00000181163, ENSG00000099800, ENSG00000040275, ENSG00000125149, ENSG00000178750, ENSG00000113916, ENSG00000161203, ENSG00000164418, ENSG00000100321, ENSG00000082701, ENSG00000182481, ENSG00000176406, ENSG00000025796, ENSG00000136152, ENSG00000113013, ENSG00000125124, ENSG0000…	460	414	13528	1.84692	0.999932	0.522002	6.61517
GOTERM_BP_FAT	GO:0007010~cytoskeleton organization	27	4.44079	0.00388897	ENSG00000142330, ENSG00000128340, ENSG00000151150, ENSG00000136167, ENSG00000121853, ENSG00000100311, ENSG00000181163, ENSG00000134318, ENSG00000092439, ENSG00000137804, ENSG00000143952, ENSG00000050820, ENSG00000196405, ENSG00000079819, ENSG00000040275, ENSG00000101162, ENSG00000113916, ENSG00000092529, ENSG00000139132, ENSG00000137877, ENSG00000076321, ENSG00000134516, ENSG00000137814, ENSG0000…	460	436	13528	1.82118	0.999934	0.49715	6.63418
GOTERM_BP_FAT	GO:0007214~gamma-aminobutyric acid signaling pathway	5	0.822368	0.00411286	ENSG00000022355, ENSG00000145864, ENSG00000145863, ENSG00000136928, ENSG00000113327	460	20	13528	7.35217	0.999962	0.492698	7.00319
GOTERM_BP_FAT	GO:0006461~protein complex assembly	30	4.93421	0.00413031	ENSG00000164494, ENSG00000187741, ENSG00000163145, ENSG00000145863, ENSG00000157764, ENSG00000067057, ENSG00000163882, ENSG00000100151, ENSG00000145431, ENSG00000181163, ENSG00000167772, ENSG00000137806, ENSG00000147647, ENSG00000074582, ENSG00000100065, ENSG00000147601, ENSG00000188342, ENSG00000101162, ENSG00000122779, ENSG00000154188, ENSG00000164418, ENSG00000039068, ENSG00000159461, ENSG0000…	460	505	13528	1.74705	0.999964	0.472147	7.03189
GOTERM_BP_FAT	GO:0070271~protein complex biogenesis	30	4.93421	0.00413031	ENSG00000164494, ENSG00000187741, ENSG00000163145, ENSG00000145863, ENSG00000157764, ENSG00000067057, ENSG00000163882, ENSG00000100151, ENSG00000145431, ENSG00000181163, ENSG00000167772, ENSG00000137806, ENSG00000147647, ENSG00000074582, ENSG00000100065, ENSG00000147601, ENSG00000188342, ENSG00000101162, ENSG00000122779, ENSG00000154188, ENSG00000164418, ENSG00000039068, ENSG00000159461, ENSG0000…	460	505	13528	1.74705	0.999964	0.472147	7.03189
GOTERM_BP_FAT	GO:0006812~cation transport	32	5.26316	0.00426418	ENSG00000120457, ENSG00000143882, ENSG00000151704, ENSG00000018280, ENSG00000168575, ENSG00000186815, ENSG00000061987, ENSG00000180332, ENSG00000156486, ENSG00000105929, ENSG00000162687, ENSG00000070915, ENSG00000133195, ENSG00000145936, ENSG00000182866, ENSG00000092439, ENSG00000091664, ENSG00000164707, ENSG00000170745, ENSG00000142185, ENSG00000182674, ENSG00000155097, ENSG00000089060, ENSG0000…	460	553	13528	1.70177	0.999974	0.462531	7.2518
GOTERM_BP_FAT	GO:0030036~actin cytoskeleton organization	17	2.79605	0.00448378	ENSG00000142330, ENSG00000128340, ENSG00000079819, ENSG00000136167, ENSG00000121853, ENSG00000113916, ENSG00000092529, ENSG00000139132, ENSG00000100311, ENSG00000134318, ENSG00000092439, ENSG00000137877, ENSG00000134516, ENSG00000100266, ENSG00000134324, ENSG00000050820, ENSG00000196405	460	226	13528	2.21216	0.999985	0.460255	7.61149
GOTERM_BP_FAT	GO:0006119~oxidative phosphorylation	10	1.64474	0.00600985	ENSG00000143882, ENSG00000105929, ENSG00000075399, ENSG00000155097, ENSG00000095002, ENSG00000145335, ENSG00000061987, ENSG00000140740, ENSG00000090266, ENSG00000137806	460	98	13528	3.00089	1	0.543258	10.075
GOTERM_BP_FAT	GO:0010605~negative regulation of macromolecule metabolic process	39	6.41447	0.00605404	ENSG00000106571, ENSG00000163519, ENSG00000152894, ENSG00000108854, ENSG00000144744, ENSG00000064393, ENSG00000169016, ENSG00000121853, ENSG00000172059, ENSG00000145335, ENSG00000141002, ENSG00000057663, ENSG00000181163, ENSG00000104408, ENSG00000198373, ENSG00000101158, ENSG00000116478, ENSG00000095002, ENSG00000145191, ENSG00000150347, ENSG00000043039, ENSG00000116062, ENSG00000147601, ENSG0000…	460	734	13528	1.56259	1	0.527608	10.1454
GOTERM_BP_FAT	GO:0051270~regulation of cell motion	15	2.46711	0.00616081	ENSG00000157005, ENSG00000152894, ENSG00000182168, ENSG00000113916, ENSG00000124205, ENSG00000136960, ENSG00000196569, ENSG00000090539, ENSG00000100311, ENSG00000089225, ENSG00000134954, ENSG00000127837, ENSG00000112245, ENSG00000125124, ENSG00000050820	460	193	13528	2.28565	1	0.51658	10.3153
GOTERM_BP_FAT	GO:0043933~macromolecular complex subunit organization	38	6.25	0.00625535	ENSG00000079785, ENSG00000164494, ENSG00000187741, ENSG00000163145, ENSG00000145863, ENSG00000121853, ENSG00000157764, ENSG00000163882, ENSG00000067057, ENSG00000100151, ENSG00000145431, ENSG00000181163, ENSG00000167772, ENSG00000196405, ENSG00000137806, ENSG00000147647, ENSG00000074582, ENSG00000147601, ENSG00000100065, ENSG00000188342, ENSG00000101162, ENSG00000132603, ENSG00000135250, ENSG0000…	460	710	13528	1.57399	1	0.50565	10.4654
GOTERM_BP_FAT	GO:0008104~protein localization	45	7.40132	0.0064435	ENSG00000106571, ENSG00000151150, ENSG00000166887, ENSG00000152894, ENSG00000018280, ENSG00000114423, ENSG00000198586, ENSG00000009844, ENSG00000061987, ENSG00000100151, ENSG00000117475, ENSG00000183255, ENSG00000099800, ENSG00000181163, ENSG00000166685, ENSG00000118507, ENSG00000185236, ENSG00000143952, ENSG00000146955, ENSG00000138660, ENSG00000105829, ENSG00000040275, ENSG00000125149, ENSG0000…	460	882	13528	1.50044	1	0.500534	10.7636
GOTERM_BP_FAT	GO:0045184~establishment of protein localization	40	6.57895	0.00784835	ENSG00000106571, ENSG00000151150, ENSG00000166887, ENSG00000018280, ENSG00000114423, ENSG00000198586, ENSG00000009844, ENSG00000061987, ENSG00000100151, ENSG00000117475, ENSG00000183255, ENSG00000099800, ENSG00000181163, ENSG00000166685, ENSG00000185236, ENSG00000143952, ENSG00000146955, ENSG00000138660, ENSG00000105829, ENSG00000125149, ENSG00000178750, ENSG00000031823, ENSG00000113916, ENSG0000…	460	769	13528	1.52971	1	0.555548	12.9605
GOTERM_BP_FAT	GO:0030001~metal ion transport	27	4.44079	0.00880213	ENSG00000120457, ENSG00000151704, ENSG00000018280, ENSG00000168575, ENSG00000180332, ENSG00000186815, ENSG00000156486, ENSG00000162687, ENSG00000070915, ENSG00000133195, ENSG00000145936, ENSG00000182866, ENSG00000092439, ENSG00000091664, ENSG00000164707, ENSG00000170745, ENSG00000182674, ENSG00000142185, ENSG00000089060, ENSG00000187446, ENSG00000184261, ENSG00000166558, ENSG00000182132, ENSG0000…	460	465	13528	1.7076	1	0.582512	14.4229
GOTERM_BP_FAT	GO:0006793~phosphorus metabolic process	48	7.89474	0.00880767	ENSG00000142731, ENSG00000143882, ENSG00000092445, ENSG00000151151, ENSG00000169764, ENSG00000152894, ENSG00000064393, ENSG00000198586, ENSG00000157764, ENSG00000145335, ENSG00000061987, ENSG00000185324, ENSG00000100151, ENSG00000115694, ENSG00000170312, ENSG00000105929, ENSG00000144959, ENSG00000134318, ENSG00000182866, ENSG00000073331, ENSG00000092439, ENSG00000095002, ENSG00000112245, ENSG0000…	460	973	13528	1.45079	1	0.568477	14.4313
GOTERM_BP_FAT	GO:0006796~phosphate metabolic process	48	7.89474	0.00880767	ENSG00000142731, ENSG00000143882, ENSG00000092445, ENSG00000151151, ENSG00000169764, ENSG00000152894, ENSG00000064393, ENSG00000198586, ENSG00000157764, ENSG00000145335, ENSG00000061987, ENSG00000185324, ENSG00000100151, ENSG00000115694, ENSG00000170312, ENSG00000105929, ENSG00000144959, ENSG00000134318, ENSG00000182866, ENSG00000073331, ENSG00000092439, ENSG00000095002, ENSG00000112245, ENSG0000…	460	973	13528	1.45079	1	0.568477	14.4313
GOTERM_BP_FAT	GO:0006886~intracellular protein transport	23	3.78289	0.00883445	ENSG00000106571, ENSG00000125149, ENSG00000178750, ENSG00000114423, ENSG00000018280, ENSG00000198586, ENSG00000113916, ENSG00000161203, ENSG00000100151, ENSG00000100321, ENSG00000164418, ENSG00000082701, ENSG00000183255, ENSG00000099800, ENSG00000181163, ENSG00000182481, ENSG00000176406, ENSG00000136152, ENSG00000025796, ENSG00000113013, ENSG00000025800, ENSG00000100083, ENSG00000184432	460	374	13528	1.80856	1	0.555933	14.472
GOTERM_BP_FAT	GO:0016310~phosphorylation	41	6.74342	0.00885786	ENSG00000142731, ENSG00000143882, ENSG00000092445, ENSG00000151151, ENSG00000169764, ENSG00000064393, ENSG00000198586, ENSG00000157764, ENSG00000145335, ENSG00000061987, ENSG00000185324, ENSG00000100151, ENSG00000115694, ENSG00000170312, ENSG00000105929, ENSG00000134318, ENSG00000182866, ENSG00000073331, ENSG00000092439, ENSG00000095002, ENSG00000140740, ENSG00000137806, ENSG00000101349, ENSG0000…	460	800	13528	1.5072	1	0.543822	14.5076
GOTERM_BP_FAT	GO:0046907~intracellular transport	35	5.75658	0.00953923	ENSG00000106571, ENSG00000018280, ENSG00000114423, ENSG00000198586, ENSG00000102189, ENSG00000061987, ENSG00000100151, ENSG00000183255, ENSG00000125676, ENSG00000099800, ENSG00000181163, ENSG00000166685, ENSG00000143952, ENSG00000105829, ENSG00000125149, ENSG00000178750, ENSG00000031823, ENSG00000113916, ENSG00000161203, ENSG00000174032, ENSG00000100321, ENSG00000090615, ENSG00000164418, ENSG0000…	460	657	13528	1.56667	1	0.557971	15.5371
GOTERM_BP_FAT	GO:0006091~generation of precursor metabolites and energy	20	3.28947	0.0105448	ENSG00000143882, ENSG00000103018, ENSG00000155097, ENSG00000163806, ENSG00000145335, ENSG00000061987, ENSG00000067057, ENSG00000082701, ENSG00000105929, ENSG00000075399, ENSG00000115592, ENSG00000115840, ENSG00000014641, ENSG00000181092, ENSG00000095002, ENSG00000071967, ENSG00000140740, ENSG00000137806, ENSG00000090266, ENSG00000103089	460	313	13528	1.87915	1	0.58222	17.0351
GOTERM_BP_FAT	GO:0009165~nucleotide biosynthetic process	14	2.30263	0.0109319	ENSG00000143882, ENSG00000155097, ENSG00000047230, ENSG00000188641, ENSG00000061987, ENSG00000105929, ENSG00000075399, ENSG00000061918, ENSG00000143153, ENSG00000095002, ENSG00000171848, ENSG00000163864, ENSG00000143156, ENSG00000118322	460	186	13528	2.21356	1	0.583479	17.605
GOTERM_BP_FAT	GO:0015031~protein transport	39	6.41447	0.0110091	ENSG00000106571, ENSG00000166887, ENSG00000018280, ENSG00000114423, ENSG00000198586, ENSG00000009844, ENSG00000061987, ENSG00000100151, ENSG00000117475, ENSG00000183255, ENSG00000099800, ENSG00000181163, ENSG00000166685, ENSG00000185236, ENSG00000143952, ENSG00000146955, ENSG00000138660, ENSG00000105829, ENSG00000125149, ENSG00000178750, ENSG00000031823, ENSG00000113916, ENSG00000161203, ENSG0000…	460	762	13528	1.50517	1	0.574496	17.7183
GOTERM_BP_FAT	GO:0065003~macromolecular complex assembly	35	5.75658	0.0112079	ENSG00000079785, ENSG00000164494, ENSG00000187741, ENSG00000163145, ENSG00000145863, ENSG00000157764, ENSG00000163882, ENSG00000067057, ENSG00000100151, ENSG00000145431, ENSG00000181163, ENSG00000167772, ENSG00000137806, ENSG00000147647, ENSG00000074582, ENSG00000100065, ENSG00000147601, ENSG00000188342, ENSG00000101162, ENSG00000132603, ENSG00000135250, ENSG00000122779, ENSG00000154188, ENSG0000…	460	665	13528	1.54783	1	0.569853	18.0091
GOTERM_BP_FAT	GO:0015698~inorganic anion transport	9	1.48026	0.0136001	ENSG00000070915, ENSG00000164707, ENSG00000018280, ENSG00000022355, ENSG00000168575, ENSG00000145863, ENSG00000147606, ENSG00000114859, ENSG00000113327	460	93	13528	2.846	1	0.630198	21.4343
GOTERM_BP_FAT	GO:0040012~regulation of locomotion	14	2.30263	0.0139718	ENSG00000157005, ENSG00000152894, ENSG00000182168, ENSG00000145335, ENSG00000124205, ENSG00000196569, ENSG00000136960, ENSG00000090539, ENSG00000100311, ENSG00000089225, ENSG00000127837, ENSG00000112245, ENSG00000125124, ENSG00000050820	460	192	13528	2.14438	1	0.629522	21.9542
GOTERM_BP_FAT	GO:0034654~nucleobase, nucleoside, nucleotide and nucleic acid biosynthetic process	14	2.30263	0.0145359	ENSG00000143882, ENSG00000155097, ENSG00000047230, ENSG00000188641, ENSG00000061987, ENSG00000105929, ENSG00000075399, ENSG00000061918, ENSG00000143153, ENSG00000095002, ENSG00000171848, ENSG00000163864, ENSG00000143156, ENSG00000118322	460	193	13528	2.13327	1	0.633825	22.7371
GOTERM_BP_FAT	GO:0034404~nucleobase, nucleoside and nucleotide biosynthetic process	14	2.30263	0.0145359	ENSG00000143882, ENSG00000155097, ENSG00000047230, ENSG00000188641, ENSG00000061987, ENSG00000105929, ENSG00000075399, ENSG00000061918, ENSG00000143153, ENSG00000095002, ENSG00000171848, ENSG00000163864, ENSG00000143156, ENSG00000118322	460	193	13528	2.13327	1	0.633825	22.7371
GOTERM_BP_FAT	GO:0044271~nitrogen compound biosynthetic process	20	3.28947	0.0150798	ENSG00000143882, ENSG00000115758, ENSG00000135821, ENSG00000155097, ENSG00000145335, ENSG00000188641, ENSG00000047230, ENSG00000061987, ENSG00000105929, ENSG00000075399, ENSG00000061918, ENSG00000155096, ENSG00000181019, ENSG00000143153, ENSG00000095002, ENSG00000171848, ENSG00000140287, ENSG00000163864, ENSG00000143156, ENSG00000118322	460	325	13528	1.80977	1	0.63736	23.4848
GOTERM_BP_FAT	GO:0010824~regulation of centrosome duplication	3	0.493421	0.0157372	ENSG00000142731, ENSG00000134318, ENSG00000181163	460	6	13528	14.7043	1	0.643369	24.3796
GOTERM_BP_FAT	GO:0033044~regulation of chromosome organization	5	0.822368	0.0178259	ENSG00000146872, ENSG00000177889, ENSG00000147601, ENSG00000198586, ENSG00000145335	460	30	13528	4.90145	1	0.679912	27.1574
GOTERM_BP_FAT	GO:0042127~regulation of cell proliferation	39	6.41447	0.0178577	ENSG00000126010, ENSG00000106571, ENSG00000175130, ENSG00000128340, ENSG00000187741, ENSG00000115758, ENSG00000152894, ENSG00000064393, ENSG00000114423, ENSG00000124205, ENSG00000172059, ENSG00000180616, ENSG00000089116, ENSG00000153774, ENSG00000185324, ENSG00000080546, ENSG00000156427, ENSG00000145431, ENSG00000181163, ENSG00000114013, ENSG00000100311, ENSG00000134954, ENSG00000136205, ENSG0000…	460	787	13528	1.45736	1	0.671322	27.1989
GOTERM_BP_FAT	GO:0015837~amine transport	10	1.64474	0.0189664	ENSG00000166558, ENSG00000180773, ENSG00000105143, ENSG00000115840, ENSG00000164933, ENSG00000144746, ENSG00000018280, ENSG00000103316, ENSG00000165970, ENSG00000100151	460	118	13528	2.49226	1	0.684497	28.6332
GOTERM_BP_FAT	GO:0045910~negative regulation of DNA recombination	3	0.493421	0.0215415	ENSG00000116062, ENSG00000095002, ENSG00000113916	460	7	13528	12.6037	1	0.722154	31.8623
GOTERM_BP_FAT	GO:0010638~positive regulation of organelle organization	8	1.31579	0.0224497	ENSG00000142731, ENSG00000177889, ENSG00000163466, ENSG00000134318, ENSG00000181163, ENSG00000147601, ENSG00000124205, ENSG00000137804	460	83	13528	2.83457	1	0.728624	32.9679
GOTERM_BP_FAT	GO:0043068~positive regulation of programmed cell death	24	3.94737	0.0228701	ENSG00000116062, ENSG00000176720, ENSG00000142330, ENSG00000157005, ENSG00000178607, ENSG00000064393, ENSG00000147601, ENSG00000113916, ENSG00000121858, ENSG00000155090, ENSG00000139132, ENSG00000164418, ENSG00000165973, ENSG00000102871, ENSG00000104375, ENSG00000182866, ENSG00000137462, ENSG00000089225, ENSG00000134954, ENSG00000181092, ENSG00000188215, ENSG00000181019, ENSG00000118689, ENSG0000…	460	433	13528	1.63004	1	0.727127	33.4739
GOTERM_BP_FAT	GO:0010942~positive regulation of cell death	24	3.94737	0.0237687	ENSG00000116062, ENSG00000176720, ENSG00000142330, ENSG00000157005, ENSG00000178607, ENSG00000064393, ENSG00000147601, ENSG00000113916, ENSG00000121858, ENSG00000155090, ENSG00000139132, ENSG00000164418, ENSG00000165973, ENSG00000102871, ENSG00000104375, ENSG00000182866, ENSG00000137462, ENSG00000089225, ENSG00000134954, ENSG00000181092, ENSG00000188215, ENSG00000181019, ENSG00000118689, ENSG0000…	460	435	13528	1.62255	1	0.73297	34.5436
GOTERM_BP_FAT	GO:0007178~transmembrane receptor protein serine/threonine kinase signaling pathway	9	1.48026	0.0237692	ENSG00000155090, ENSG00000100324, ENSG00000100311, ENSG00000152894, ENSG00000108854, ENSG00000163430, ENSG00000064393, ENSG00000164692, ENSG00000090539	460	103	13528	2.56969	1	0.725201	34.5441
GOTERM_BP_FAT	GO:0007167~enzyme linked receptor protein signaling pathway	20	3.28947	0.0244358	ENSG00000103994, ENSG00000152894, ENSG00000108854, ENSG00000114354, ENSG00000163430, ENSG00000064393, ENSG00000044524, ENSG00000090539, ENSG00000156427, ENSG00000100151, ENSG00000154188, ENSG00000155090, ENSG00000164418, ENSG00000182580, ENSG00000145431, ENSG00000100311, ENSG00000100324, ENSG00000164692, ENSG00000150347, ENSG00000050820	460	342	13528	1.71981	1	0.727503	35.3271
GOTERM_BP_FAT	GO:0034220~ion transmembrane transport	6	0.986842	0.0246408	ENSG00000143882, ENSG00000105929, ENSG00000075399, ENSG00000018280, ENSG00000155097, ENSG00000061987	460	49	13528	3.60106	1	0.723033	35.566
GOTERM_BP_FAT	GO:0048008~platelet-derived growth factor receptor signaling pathway	4	0.657895	0.0250997	ENSG00000145431, ENSG00000100311, ENSG00000150347, ENSG00000050820	460	19	13528	6.1913	1	0.722346	36.0981
GOTERM_BP_FAT	GO:0006891~intra-Golgi vesicle-mediated transport	4	0.657895	0.0250997	ENSG00000090615, ENSG00000166685, ENSG00000136152, ENSG00000184432	460	19	13528	6.1913	1	0.722346	36.0981
GOTERM_BP_FAT	GO:0031327~negative regulation of cellular biosynthetic process	29	4.76974	0.0266157	ENSG00000106571, ENSG00000144744, ENSG00000152894, ENSG00000108854, ENSG00000064393, ENSG00000169016, ENSG00000121853, ENSG00000141002, ENSG00000172059, ENSG00000100311, ENSG00000104408, ENSG00000101158, ENSG00000179603, ENSG00000116478, ENSG00000145191, ENSG00000150347, ENSG00000043039, ENSG00000147601, ENSG00000135111, ENSG00000122779, ENSG00000103316, ENSG00000113916, ENSG00000155090, ENSG0000…	460	561	13528	1.52024	1	0.736217	37.8262
GOTERM_BP_FAT	GO:0045934~negative regulation of nucleobase, nucleoside, nucleotide and nucleic acid metabolic process	27	4.44079	0.0266555	ENSG00000106571, ENSG00000144744, ENSG00000152894, ENSG00000108854, ENSG00000064393, ENSG00000169016, ENSG00000141002, ENSG00000172059, ENSG00000181163, ENSG00000101158, ENSG00000179603, ENSG00000116478, ENSG00000095002, ENSG00000150347, ENSG00000043039, ENSG00000116062, ENSG00000147601, ENSG00000135111, ENSG00000122779, ENSG00000103316, ENSG00000113916, ENSG00000155090, ENSG00000121481, ENSG0000…	460	512	13528	1.55085	1	0.72977	37.871
GOTERM_BP_FAT	GO:0034976~response to endoplasmic reticulum stress	5	0.822368	0.0271449	ENSG00000082701, ENSG00000159461, ENSG00000178607, ENSG00000128272, ENSG00000135842	460	34	13528	4.32481	1	0.729425	38.419
GOTERM_BP_FAT	GO:0046605~regulation of centrosome cycle	3	0.493421	0.0280843	ENSG00000142731, ENSG00000134318, ENSG00000181163	460	8	13528	11.0283	1	0.734878	39.4582
GOTERM_BP_FAT	GO:0001919~regulation of receptor recycling	3	0.493421	0.0280843	ENSG00000163519, ENSG00000125675, ENSG00000145335	460	8	13528	11.0283	1	0.734878	39.4582
GOTERM_BP_FAT	GO:0030334~regulation of cell migration	12	1.97368	0.0292312	ENSG00000157005, ENSG00000100311, ENSG00000152894, ENSG00000089225, ENSG00000127837, ENSG00000182168, ENSG00000124205, ENSG00000112245, ENSG00000136960, ENSG00000050820, ENSG00000196569, ENSG00000090539	460	169	13528	2.08819	1	0.742565	40.7045
GOTERM_BP_FAT	GO:0051172~negative regulation of nitrogen compound metabolic process	27	4.44079	0.0307331	ENSG00000106571, ENSG00000144744, ENSG00000152894, ENSG00000108854, ENSG00000064393, ENSG00000169016, ENSG00000141002, ENSG00000172059, ENSG00000181163, ENSG00000101158, ENSG00000179603, ENSG00000116478, ENSG00000095002, ENSG00000150347, ENSG00000043039, ENSG00000116062, ENSG00000147601, ENSG00000135111, ENSG00000122779, ENSG00000103316, ENSG00000113916, ENSG00000155090, ENSG00000121481, ENSG0000…	460	519	13528	1.52993	1	0.753858	42.3
GOTERM_BP_FAT	GO:0006865~amino acid transport	8	1.31579	0.0331094	ENSG00000166558, ENSG00000180773, ENSG00000105143, ENSG00000115840, ENSG00000164933, ENSG00000144746, ENSG00000018280, ENSG00000165970	460	90	13528	2.61411	1	0.773517	44.742
GOTERM_BP_FAT	GO:0009890~negative regulation of biosynthetic process	29	4.76974	0.0337857	ENSG00000106571, ENSG00000144744, ENSG00000152894, ENSG00000108854, ENSG00000064393, ENSG00000169016, ENSG00000121853, ENSG00000141002, ENSG00000172059, ENSG00000100311, ENSG00000104408, ENSG00000101158, ENSG00000179603, ENSG00000116478, ENSG00000145191, ENSG00000150347, ENSG00000043039, ENSG00000147601, ENSG00000135111, ENSG00000122779, ENSG00000103316, ENSG00000113916, ENSG00000155090, ENSG0000…	460	573	13528	1.4884	1	0.774481	45.4189
GOTERM_BP_FAT	GO:0045749~negative regulation of S phase of mitotic cell cycle	3	0.493421	0.035309	ENSG00000188215, ENSG00000131165, ENSG00000113916	460	9	13528	9.8029	1	0.783651	46.9152
GOTERM_BP_FAT	GO:0043065~positive regulation of apoptosis	23	3.78289	0.0365884	ENSG00000116062, ENSG00000176720, ENSG00000142330, ENSG00000157005, ENSG00000178607, ENSG00000064393, ENSG00000147601, ENSG00000113916, ENSG00000121858, ENSG00000155090, ENSG00000139132, ENSG00000165973, ENSG00000102871, ENSG00000104375, ENSG00000182866, ENSG00000137462, ENSG00000089225, ENSG00000134954, ENSG00000181092, ENSG00000181019, ENSG00000188215, ENSG00000118689, ENSG00000073282	460	430	13528	1.57302	1	0.789964	48.1419
GOTERM_BP_FAT	GO:0006913~nucleocytoplasmic transport	11	1.80921	0.0399407	ENSG00000106571, ENSG00000082701, ENSG00000183255, ENSG00000125676, ENSG00000181163, ENSG00000182481, ENSG00000018280, ENSG00000114423, ENSG00000113013, ENSG00000113916, ENSG00000025800	460	156	13528	2.07369	1	0.813246	51.2305
GOTERM_BP_FAT	GO:0051052~regulation of DNA metabolic process	9	1.48026	0.0400899	ENSG00000177889, ENSG00000116062, ENSG00000145431, ENSG00000100311, ENSG00000182481, ENSG00000147601, ENSG00000104313, ENSG00000095002, ENSG00000113916	460	114	13528	2.32174	1	0.809242	51.3639
GOTERM_BP_FAT	GO:0010564~regulation of cell cycle process	9	1.48026	0.0400899	ENSG00000142731, ENSG00000134318, ENSG00000181163, ENSG00000147601, ENSG00000188215, ENSG00000131165, ENSG00000124205, ENSG00000113916, ENSG00000137804	460	114	13528	2.32174	1	0.809242	51.3639
GOTERM_BP_FAT	GO:0042472~inner ear morphogenesis	6	0.986842	0.0408069	ENSG00000152977, ENSG00000164930, ENSG00000115507, ENSG00000104313, ENSG00000112320, ENSG00000168269	460	56	13528	3.15093	1	0.809822	51.9999
GOTERM_BP_FAT	GO:0051169~nuclear transport	11	1.80921	0.0429513	ENSG00000106571, ENSG00000082701, ENSG00000183255, ENSG00000125676, ENSG00000181163, ENSG00000182481, ENSG00000018280, ENSG00000114423, ENSG00000113013, ENSG00000113916, ENSG00000025800	460	158	13528	2.04744	1	0.821148	53.8557
GOTERM_BP_FAT	GO:0050856~regulation of T cell receptor signaling pathway	3	0.493421	0.043162	ENSG00000163519, ENSG00000182866, ENSG00000114423	460	10	13528	8.82261	1	0.817828	54.0343
GOTERM_BP_FAT	GO:0051130~positive regulation of cellular component organization	12	1.97368	0.044605	ENSG00000142731, ENSG00000177889, ENSG00000082701, ENSG00000163466, ENSG00000134318, ENSG00000181163, ENSG00000179604, ENSG00000147601, ENSG00000018280, ENSG00000124205, ENSG00000145335, ENSG00000137804	460	181	13528	1.94975	1	0.823415	55.2403
GOTERM_BP_FAT	GO:0009205~purine ribonucleoside triphosphate metabolic process	9	1.48026	0.0455842	ENSG00000143882, ENSG00000105929, ENSG00000075399, ENSG00000155097, ENSG00000143153, ENSG00000061987, ENSG00000196365, ENSG00000143156, ENSG00000118322	460	117	13528	2.26221	1	0.82554	56.0417
GOTERM_BP_FAT	GO:0015986~ATP synthesis coupled proton transport	5	0.822368	0.0457115	ENSG00000143882, ENSG00000105929, ENSG00000075399, ENSG00000155097, ENSG00000061987	460	40	13528	3.67609	1	0.821812	56.1448
GOTERM_BP_FAT	GO:0015985~energy coupled proton transport, down electrochemical gradient	5	0.822368	0.0457115	ENSG00000143882, ENSG00000105929, ENSG00000075399, ENSG00000155097, ENSG00000061987	460	40	13528	3.67609	1	0.821812	56.1448
GOTERM_BP_FAT	GO:0033554~cellular response to stress	28	4.60526	0.0470755	ENSG00000177889, ENSG00000163029, ENSG00000187741, ENSG00000152894, ENSG00000064393, ENSG00000198586, ENSG00000145335, ENSG00000057663, ENSG00000080546, ENSG00000170312, ENSG00000128272, ENSG00000095002, ENSG00000118689, ENSG00000145191, ENSG00000116062, ENSG00000178607, ENSG00000103489, ENSG00000104517, ENSG00000163806, ENSG00000113916, ENSG00000135842, ENSG00000139132, ENSG00000146872, ENSG0000…	460	566	13528	1.45485	1	0.826488	57.2361
GOTERM_BP_FAT	GO:0009199~ribonucleoside triphosphate metabolic process	9	1.48026	0.0475201	ENSG00000143882, ENSG00000105929, ENSG00000075399, ENSG00000155097, ENSG00000143153, ENSG00000061987, ENSG00000196365, ENSG00000143156, ENSG00000118322	460	118	13528	2.24304	1	0.824975	57.5862
GOTERM_BP_FAT	GO:0012502~induction of programmed cell death	18	2.96053	0.0476284	ENSG00000176720, ENSG00000116062, ENSG00000157005, ENSG00000178607, ENSG00000064393, ENSG00000147601, ENSG00000121858, ENSG00000155090, ENSG00000139132, ENSG00000164418, ENSG00000165973, ENSG00000102871, ENSG00000182866, ENSG00000137462, ENSG00000089225, ENSG00000134954, ENSG00000118689, ENSG00000073282	460	321	13528	1.64909	1	0.821281	57.6711
GOTERM_BP_FAT	GO:0007268~synaptic transmission	17	2.79605	0.0477604	ENSG00000157005, ENSG00000105143, ENSG00000128310, ENSG00000145864, ENSG00000145863, ENSG00000121853, ENSG00000145335, ENSG00000164418, ENSG00000128683, ENSG00000145936, ENSG00000179603, ENSG00000182132, ENSG00000181019, ENSG00000091664, ENSG00000136928, ENSG00000165970, ENSG00000113327	460	298	13528	1.67768	1	0.817775	57.7744
GOTERM_BP_FAT	GO:0009206~purine ribonucleoside triphosphate biosynthetic process	8	1.31579	0.0488979	ENSG00000143882, ENSG00000105929, ENSG00000075399, ENSG00000155097, ENSG00000143153, ENSG00000061987, ENSG00000143156, ENSG00000118322	460	98	13528	2.40071	1	0.82091	58.6542
GOTERM_BP_FAT	GO:0009201~ribonucleoside triphosphate biosynthetic process	8	1.31579	0.0511565	ENSG00000143882, ENSG00000105929, ENSG00000075399, ENSG00000155097, ENSG00000143153, ENSG00000061987, ENSG00000143156, ENSG00000118322	460	99	13528	2.37646	1	0.830814	60.3502
GOTERM_BP_FAT	GO:0009145~purine nucleoside triphosphate biosynthetic process	8	1.31579	0.0511565	ENSG00000143882, ENSG00000105929, ENSG00000075399, ENSG00000155097, ENSG00000143153, ENSG00000061987, ENSG00000143156, ENSG00000118322	460	99	13528	2.37646	1	0.830814	60.3502
GOTERM_BP_FAT	GO:0010948~negative regulation of cell cycle process	4	0.657895	0.0513497	ENSG00000147601, ENSG00000188215, ENSG00000131165, ENSG00000113916	460	25	13528	4.70539	1	0.827876	60.4921
GOTERM_BP_FAT	GO:0006163~purine nucleotide metabolic process	12	1.97368	0.0524014	ENSG00000143882, ENSG00000105929, ENSG00000075399, ENSG00000061918, ENSG00000155097, ENSG00000143153, ENSG00000095002, ENSG00000061987, ENSG00000196365, ENSG00000143156, ENSG00000118322, ENSG00000073417	460	186	13528	1.89734	1	0.830112	61.2567
GOTERM_BP_FAT	GO:0010558~negative regulation of macromolecule biosynthetic process	27	4.44079	0.0525326	ENSG00000106571, ENSG00000144744, ENSG00000152894, ENSG00000108854, ENSG00000064393, ENSG00000169016, ENSG00000121853, ENSG00000141002, ENSG00000172059, ENSG00000104408, ENSG00000101158, ENSG00000116478, ENSG00000145191, ENSG00000150347, ENSG00000043039, ENSG00000147601, ENSG00000135111, ENSG00000122779, ENSG00000103316, ENSG00000113916, ENSG00000155090, ENSG00000121481, ENSG00000181092, ENSG0000…	460	547	13528	1.45162	1	0.826883	61.3511
GOTERM_BP_FAT	GO:0006928~cell motion	24	3.94737	0.0548782	ENSG00000163466, ENSG00000151150, ENSG00000152894, ENSG00000079308, ENSG00000182168, ENSG00000141013, ENSG00000124205, ENSG00000136960, ENSG00000109132, ENSG00000182580, ENSG00000159461, ENSG00000100311, ENSG00000136205, ENSG00000134954, ENSG00000164438, ENSG00000127837, ENSG00000164932, ENSG00000134516, ENSG00000095002, ENSG00000170017, ENSG00000077097, ENSG00000150347, ENSG00000050820, ENSG0000…	460	475	13528	1.48591	1	0.836432	63.0025
GOTERM_BP_FAT	GO:0007267~cell-cell signaling	29	4.76974	0.0552844	ENSG00000183918, ENSG00000145864, ENSG00000145863, ENSG00000121853, ENSG00000124205, ENSG00000145335, ENSG00000180616, ENSG00000089116, ENSG00000121858, ENSG00000156427, ENSG00000128683, ENSG00000145936, ENSG00000114013, ENSG00000179603, ENSG00000181019, ENSG00000091664, ENSG00000145194, ENSG00000165970, ENSG00000113327, ENSG00000157005, ENSG00000105143, ENSG00000128310, ENSG00000135111, ENSG0000…	460	600	13528	1.42142	1	0.834854	63.2816
GOTERM_BP_FAT	GO:0006821~chloride transport	6	0.986842	0.055527	ENSG00000070915, ENSG00000022355, ENSG00000145863, ENSG00000147606, ENSG00000114859, ENSG00000113327	460	61	13528	2.89266	1	0.832397	63.4474
GOTERM_BP_FAT	GO:0009144~purine nucleoside triphosphate metabolic process	9	1.48026	0.0557956	ENSG00000143882, ENSG00000105929, ENSG00000075399, ENSG00000155097, ENSG00000143153, ENSG00000061987, ENSG00000196365, ENSG00000143156, ENSG00000118322	460	122	13528	2.16949	1	0.830112	63.63
GOTERM_BP_FAT	GO:0000018~regulation of DNA recombination	4	0.657895	0.0566371	ENSG00000116062, ENSG00000182481, ENSG00000095002, ENSG00000113916	460	26	13528	4.52441	1	0.831011	64.1969
GOTERM_BP_FAT	GO:0045786~negative regulation of cell cycle	7	1.15132	0.0568861	ENSG00000152894, ENSG00000134954, ENSG00000147601, ENSG00000188215, ENSG00000116478, ENSG00000131165, ENSG00000113916	460	81	13528	2.54149	1	0.828674	64.363
GOTERM_BP_FAT	GO:0043066~negative regulation of apoptosis	19	3.125	0.0575731	ENSG00000064393, ENSG00000135111, ENSG00000157764, ENSG00000113916, ENSG00000145335, ENSG00000153774, ENSG00000057663, ENSG00000164418, ENSG00000170312, ENSG00000082701, ENSG00000181163, ENSG00000167772, ENSG00000116478, ENSG00000095002, ENSG00000104313, ENSG00000073282, ENSG00000113013, ENSG00000101349, ENSG00000133112	460	354	13528	1.57843	1	0.828748	64.8176
GOTERM_BP_FAT	GO:0009142~nucleoside triphosphate biosynthetic process	8	1.31579	0.0583224	ENSG00000143882, ENSG00000105929, ENSG00000075399, ENSG00000155097, ENSG00000143153, ENSG00000061987, ENSG00000143156, ENSG00000118322	460	102	13528	2.30656	1	0.829156	65.3071
GOTERM_BP_FAT	GO:0051726~regulation of cell cycle	18	2.96053	0.0591571	ENSG00000142731, ENSG00000144744, ENSG00000152894, ENSG00000147601, ENSG00000163806, ENSG00000135111, ENSG00000113916, ENSG00000124205, ENSG00000185324, ENSG00000170312, ENSG00000181163, ENSG00000134318, ENSG00000134954, ENSG00000116478, ENSG00000188215, ENSG00000095002, ENSG00000131165, ENSG00000137804	460	331	13528	1.59926	1	0.830004	65.8448
GOTERM_BP_FAT	GO:0009260~ribonucleotide biosynthetic process	9	1.48026	0.0602568	ENSG00000143882, ENSG00000105929, ENSG00000075399, ENSG00000155097, ENSG00000143153, ENSG00000188641, ENSG00000061987, ENSG00000143156, ENSG00000118322	460	124	13528	2.1345	1	0.832198	66.5414
GOTERM_BP_FAT	GO:0010259~multicellular organismal aging	3	0.493421	0.0605528	ENSG00000116062, ENSG00000095002, ENSG00000073282	460	12	13528	7.35217	1	0.830244	66.7266
GOTERM_BP_FAT	GO:0050854~regulation of antigen receptor-mediated signaling pathway	3	0.493421	0.0605528	ENSG00000163519, ENSG00000182866, ENSG00000114423	460	12	13528	7.35217	1	0.830244	66.7266
GOTERM_BP_FAT	GO:0033365~protein localization in organelle	10	1.64474	0.0607565	ENSG00000106571, ENSG00000183255, ENSG00000099800, ENSG00000182481, ENSG00000018280, ENSG00000136152, ENSG00000114423, ENSG00000113916, ENSG00000025800, ENSG00000125124	460	146	13528	2.01429	1	0.82784	66.8534
GOTERM_BP_FAT	GO:0015711~organic anion transport	5	0.822368	0.0611901	ENSG00000105143, ENSG00000100156, ENSG00000115840, ENSG00000144746, ENSG00000147606	460	44	13528	3.3419	1	0.826638	67.122
GOTERM_BP_FAT	GO:0046942~carboxylic acid transport	10	1.64474	0.0628808	ENSG00000166558, ENSG00000180773, ENSG00000105143, ENSG00000100156, ENSG00000115840, ENSG00000164933, ENSG00000144746, ENSG00000018280, ENSG00000147606, ENSG00000165970	460	147	13528	2.00059	1	0.831761	68.1496
GOTERM_BP_FAT	GO:0009259~ribonucleotide metabolic process	10	1.64474	0.0628808	ENSG00000143882, ENSG00000105929, ENSG00000075399, ENSG00000155097, ENSG00000143153, ENSG00000188641, ENSG00000061987, ENSG00000196365, ENSG00000143156, ENSG00000118322	460	147	13528	2.00059	1	0.831761	68.1496
GOTERM_BP_FAT	GO:0006605~protein targeting	13	2.13816	0.0629074	ENSG00000100321, ENSG00000106571, ENSG00000082701, ENSG00000183255, ENSG00000099800, ENSG00000182481, ENSG00000025796, ENSG00000018280, ENSG00000114423, ENSG00000113013, ENSG00000113916, ENSG00000025800, ENSG00000100151	460	215	13528	1.7782	1	0.828566	68.1655
GOTERM_BP_FAT	GO:0043069~negative regulation of programmed cell death	19	3.125	0.0641318	ENSG00000064393, ENSG00000135111, ENSG00000157764, ENSG00000113916, ENSG00000145335, ENSG00000153774, ENSG00000057663, ENSG00000164418, ENSG00000170312, ENSG00000082701, ENSG00000181163, ENSG00000167772, ENSG00000116478, ENSG00000095002, ENSG00000104313, ENSG00000073282, ENSG00000113013, ENSG00000101349, ENSG00000133112	460	359	13528	1.55645	1	0.831276	68.8904
GOTERM_BP_FAT	GO:0006164~purine nucleotide biosynthetic process	10	1.64474	0.0650517	ENSG00000143882, ENSG00000105929, ENSG00000075399, ENSG00000061918, ENSG00000155097, ENSG00000143153, ENSG00000095002, ENSG00000061987, ENSG00000143156, ENSG00000118322	460	148	13528	1.98707	1	0.83245	69.4247
GOTERM_BP_FAT	GO:0015849~organic acid transport	10	1.64474	0.0650517	ENSG00000166558, ENSG00000180773, ENSG00000105143, ENSG00000100156, ENSG00000115840, ENSG00000164933, ENSG00000144746, ENSG00000018280, ENSG00000147606, ENSG00000165970	460	148	13528	1.98707	1	0.83245	69.4247
GOTERM_BP_FAT	GO:0006413~translational initiation	5	0.822368	0.0654416	ENSG00000104408, ENSG00000100129, ENSG00000145191, ENSG00000084623, ENSG00000135930	460	45	13528	3.26763	1	0.831097	69.6486
GOTERM_BP_FAT	GO:0046034~ATP metabolic process	8	1.31579	0.0660784	ENSG00000143882, ENSG00000105929, ENSG00000075399, ENSG00000155097, ENSG00000143153, ENSG00000061987, ENSG00000196365, ENSG00000118322	460	105	13528	2.24066	1	0.830928	70.0109
GOTERM_BP_FAT	GO:0033043~regulation of organelle organization	13	2.13816	0.0664593	ENSG00000142731, ENSG00000177889, ENSG00000163466, ENSG00000147601, ENSG00000198586, ENSG00000145335, ENSG00000124205, ENSG00000146872, ENSG00000181163, ENSG00000134318, ENSG00000137877, ENSG00000137804, ENSG00000127831	460	217	13528	1.76181	1	0.829567	70.2256
GOTERM_BP_FAT	GO:0060548~negative regulation of cell death	19	3.125	0.0664717	ENSG00000064393, ENSG00000135111, ENSG00000157764, ENSG00000113916, ENSG00000145335, ENSG00000153774, ENSG00000057663, ENSG00000164418, ENSG00000170312, ENSG00000082701, ENSG00000181163, ENSG00000167772, ENSG00000116478, ENSG00000095002, ENSG00000104313, ENSG00000073282, ENSG00000113013, ENSG00000101349, ENSG00000133112	460	360	13528	1.55213	1	0.826488	70.2326
GOTERM_BP_FAT	GO:0006212~uracil catabolic process	2	0.328947	0.0667105	ENSG00000147647, ENSG00000188641	460	2	13528	29.4087	1	0.824494	70.3664
GOTERM_BP_FAT	GO:0001672~regulation of chromatin assembly or disassembly	2	0.328947	0.0667105	ENSG00000146872, ENSG00000198586	460	2	13528	29.4087	1	0.824494	70.3664
GOTERM_BP_FAT	GO:0019860~uracil metabolic process	2	0.328947	0.0667105	ENSG00000147647, ENSG00000188641	460	2	13528	29.4087	1	0.824494	70.3664
GOTERM_BP_FAT	GO:0010825~positive regulation of centrosome duplication	2	0.328947	0.0667105	ENSG00000134318, ENSG00000181163	460	2	13528	29.4087	1	0.824494	70.3664
GOTERM_BP_FAT	GO:0021533~cell differentiation in hindbrain	3	0.493421	0.069997	ENSG00000109132, ENSG00000105887, ENSG00000089116	460	13	13528	6.78662	1	0.836431	72.152
GOTERM_BP_FAT	GO:0006607~NLS-bearing substrate import into nucleus	3	0.493421	0.069997	ENSG00000182481, ENSG00000114423, ENSG00000025800	460	13	13528	6.78662	1	0.836431	72.152
GOTERM_BP_FAT	GO:0008284~positive regulation of cell proliferation	21	3.45395	0.0709613	ENSG00000175130, ENSG00000128340, ENSG00000115758, ENSG00000196776, ENSG00000064393, ENSG00000163806, ENSG00000135111, ENSG00000124205, ENSG00000113916, ENSG00000089116, ENSG00000156427, ENSG00000145431, ENSG00000100311, ENSG00000181163, ENSG00000114013, ENSG00000136205, ENSG00000116478, ENSG00000073282, ENSG00000102878, ENSG00000134323, ENSG00000164920	460	414	13528	1.49175	1	0.837656	72.6563
GOTERM_BP_FAT	GO:0006606~protein import into nucleus	7	1.15132	0.071812	ENSG00000106571, ENSG00000183255, ENSG00000182481, ENSG00000018280, ENSG00000114423, ENSG00000113916, ENSG00000025800	460	86	13528	2.39373	1	0.83837	73.094
GOTERM_BP_FAT	GO:0010038~response to metal ion	9	1.48026	0.0723677	ENSG00000145936, ENSG00000171766, ENSG00000125675, ENSG00000182132, ENSG00000115840, ENSG00000071967, ENSG00000092529, ENSG00000145335, ENSG00000164761	460	129	13528	2.05177	1	0.837825	73.3764
GOTERM_BP_FAT	GO:0042471~ear morphogenesis	6	0.986842	0.0729339	ENSG00000152977, ENSG00000164930, ENSG00000115507, ENSG00000104313, ENSG00000112320, ENSG00000168269	460	66	13528	2.67352	1	0.837334	73.6612
GOTERM_BP_FAT	GO:0030900~forebrain development	10	1.64474	0.0742056	ENSG00000106571, ENSG00000039068, ENSG00000115507, ENSG00000104313, ENSG00000077097, ENSG00000135111, ENSG00000087258, ENSG00000125124, ENSG00000090539, ENSG00000084234	460	152	13528	1.93478	1	0.839779	74.2905
GOTERM_BP_FAT	GO:0048193~Golgi vesicle transport	9	1.48026	0.0775975	ENSG00000090615, ENSG00000092531, ENSG00000105829, ENSG00000125149, ENSG00000166685, ENSG00000136152, ENSG00000061987, ENSG00000184432, ENSG00000100151	460	131	13528	2.02044	1	0.850447	75.9004
GOTERM_BP_FAT	GO:0009141~nucleoside triphosphate metabolic process	9	1.48026	0.0775975	ENSG00000143882, ENSG00000105929, ENSG00000075399, ENSG00000155097, ENSG00000143153, ENSG00000061987, ENSG00000196365, ENSG00000143156, ENSG00000118322	460	131	13528	2.02044	1	0.850447	75.9004
GOTERM_BP_FAT	GO:0051170~nuclear import	7	1.15132	0.078355	ENSG00000106571, ENSG00000183255, ENSG00000182481, ENSG00000018280, ENSG00000114423, ENSG00000113916, ENSG00000025800	460	88	13528	2.33933	1	0.850629	76.2467
GOTERM_BP_FAT	GO:0006917~induction of apoptosis	17	2.79605	0.0791286	ENSG00000176720, ENSG00000116062, ENSG00000157005, ENSG00000178607, ENSG00000064393, ENSG00000147601, ENSG00000121858, ENSG00000139132, ENSG00000155090, ENSG00000165973, ENSG00000102871, ENSG00000182866, ENSG00000137462, ENSG00000089225, ENSG00000134954, ENSG00000118689, ENSG00000073282	460	320	13528	1.56234	1	0.85087	76.5955
GOTERM_BP_FAT	GO:0043085~positive regulation of catalytic activity	25	4.11184	0.0797449	ENSG00000177889, ENSG00000116062, ENSG00000114446, ENSG00000178607, ENSG00000147601, ENSG00000103035, ENSG00000018280, ENSG00000100065, ENSG00000124205, ENSG00000163806, ENSG00000141404, ENSG00000175166, ENSG00000100151, ENSG00000160808, ENSG00000139132, ENSG00000170312, ENSG00000058866, ENSG00000145431, ENSG00000181163, ENSG00000100324, ENSG00000182866, ENSG00000100311, ENSG00000135577, ENSG0000…	460	520	13528	1.41388	1	0.850525	76.8699
GOTERM_BP_FAT	GO:0015813~L-glutamate transport	3	0.493421	0.0798822	ENSG00000105143, ENSG00000115840, ENSG00000144746	460	14	13528	6.30186	1	0.84841	76.9306
GOTERM_BP_FAT	GO:0045935~positive regulation of nucleobase, nucleoside, nucleotide and nucleic acid metabolic process	29	4.76974	0.0800501	ENSG00000177889, ENSG00000106571, ENSG00000064393, ENSG00000018280, ENSG00000102908, ENSG00000145431, ENSG00000120533, ENSG00000114013, ENSG00000100311, ENSG00000134954, ENSG00000063978, ENSG00000116478, ENSG00000128272, ENSG00000118689, ENSG00000043039, ENSG00000067955, ENSG00000188342, ENSG00000161202, ENSG00000135111, ENSG00000122779, ENSG00000108654, ENSG00000100146, ENSG00000089225, ENSG0000…	460	624	13528	1.36675	1	0.846418	77.0046
GOTERM_BP_FAT	GO:0032388~positive regulation of intracellular transport	4	0.657895	0.0801936	ENSG00000142330, ENSG00000106571, ENSG00000039068, ENSG00000082701	460	30	13528	3.92116	1	0.844345	77.0677
GOTERM_BP_FAT	GO:0042401~biogenic amine biosynthetic process	4	0.657895	0.0801936	ENSG00000115758, ENSG00000155096, ENSG00000140287, ENSG00000145335	460	30	13528	3.92116	1	0.844345	77.0677
GOTERM_BP_FAT	GO:0006754~ATP biosynthetic process	7	1.15132	0.0817484	ENSG00000143882, ENSG00000105929, ENSG00000075399, ENSG00000155097, ENSG00000143153, ENSG00000061987, ENSG00000118322	460	89	13528	2.31304	1	0.847534	77.7412
GOTERM_BP_FAT	GO:0032886~regulation of microtubule-based process	5	0.822368	0.0839283	ENSG00000142731, ENSG00000134318, ENSG00000181163, ENSG00000147601, ENSG00000125124	460	49	13528	3.00089	1	0.852824	78.6539
GOTERM_BP_FAT	GO:0046660~female sex differentiation	6	0.986842	0.0846503	ENSG00000187741, ENSG00000073282, ENSG00000118689, ENSG00000135111, ENSG00000145191, ENSG00000154188	460	69	13528	2.55728	1	0.852864	78.9484
GOTERM_BP_FAT	GO:0046545~development of primary female sexual characteristics	6	0.986842	0.0846503	ENSG00000187741, ENSG00000073282, ENSG00000118689, ENSG00000135111, ENSG00000145191, ENSG00000154188	460	69	13528	2.55728	1	0.852864	78.9484
GOTERM_BP_FAT	GO:0051656~establishment of organelle localization	6	0.986842	0.0846503	ENSG00000092531, ENSG00000181163, ENSG00000040275, ENSG00000137804, ENSG00000125124, ENSG00000184432	460	69	13528	2.55728	1	0.852864	78.9484
GOTERM_BP_FAT	GO:0019226~transmission of nerve impulse	18	2.96053	0.0882383	ENSG00000157005, ENSG00000105143, ENSG00000128310, ENSG00000145864, ENSG00000145863, ENSG00000121853, ENSG00000145335, ENSG00000164418, ENSG00000128683, ENSG00000145936, ENSG00000179603, ENSG00000182132, ENSG00000181019, ENSG00000091664, ENSG00000136928, ENSG00000165970, ENSG00000145191, ENSG00000113327	460	350	13528	1.51245	1	0.862494	80.3557
GOTERM_BP_FAT	GO:0051051~negative regulation of transport	9	1.48026	0.0887191	ENSG00000163519, ENSG00000198373, ENSG00000144746, ENSG00000181092, ENSG00000121853, ENSG00000124205, ENSG00000145335, ENSG00000100266, ENSG00000087258	460	135	13528	1.96058	1	0.861684	80.5374
GOTERM_BP_FAT	GO:0042116~macrophage activation	3	0.493421	0.0901679	ENSG00000137462, ENSG00000018280, ENSG00000145335	460	15	13528	5.88174	1	0.863973	81.0753
GOTERM_BP_FAT	GO:0010629~negative regulation of gene expression	24	3.94737	0.0922471	ENSG00000106571, ENSG00000144744, ENSG00000108854, ENSG00000152894, ENSG00000064393, ENSG00000169016, ENSG00000122779, ENSG00000135111, ENSG00000141002, ENSG00000103316, ENSG00000113916, ENSG00000172059, ENSG00000187772, ENSG00000155090, ENSG00000121481, ENSG00000198373, ENSG00000101158, ENSG00000116478, ENSG00000131165, ENSG00000073282, ENSG00000102878, ENSG00000171634, ENSG00000150347, ENSG0000…	460	504	13528	1.40041	1	0.868123	81.8229
GOTERM_BP_FAT	GO:0022900~electron transport chain	8	1.31579	0.0929048	ENSG00000103018, ENSG00000115840, ENSG00000071967, ENSG00000145335, ENSG00000140740, ENSG00000090266, ENSG00000137806, ENSG00000103089	460	114	13528	2.06377	1	0.867861	82.0536
GOTERM_BP_FAT	GO:0032386~regulation of intracellular transport	6	0.986842	0.0929786	ENSG00000142330, ENSG00000106571, ENSG00000039068, ENSG00000082701, ENSG00000136167, ENSG00000140943	460	71	13528	2.48524	1	0.865839	82.0792
GOTERM_BP_FAT	GO:0006916~anti-apoptosis	12	1.97368	0.093092	ENSG00000170312, ENSG00000082701, ENSG00000181163, ENSG00000116478, ENSG00000073282, ENSG00000145335, ENSG00000113013, ENSG00000135111, ENSG00000157764, ENSG00000101349, ENSG00000153774, ENSG00000133112	460	206	13528	1.71313	1	0.863941	82.1187
GOTERM_BP_FAT	GO:0040007~growth	11	1.80921	0.0939584	ENSG00000106571, ENSG00000100146, ENSG00000171766, ENSG00000181163, ENSG00000100311, ENSG00000135902, ENSG00000105887, ENSG00000118689, ENSG00000143952, ENSG00000150347, ENSG00000108654	460	183	13528	1.76774	1	0.864348	82.4172
GOTERM_BP_FAT	GO:0006417~regulation of translation	9	1.48026	0.0946096	ENSG00000079785, ENSG00000120705, ENSG00000104408, ENSG00000105887, ENSG00000137449, ENSG00000114867, ENSG00000145191, ENSG00000135842, ENSG00000135930	460	137	13528	1.93196	1	0.864104	82.6386
GOTERM_BP_FAT	GO:0009150~purine ribonucleotide metabolic process	9	1.48026	0.0976368	ENSG00000143882, ENSG00000105929, ENSG00000075399, ENSG00000155097, ENSG00000143153, ENSG00000061987, ENSG00000196365, ENSG00000143156, ENSG00000118322	460	138	13528	1.91796	1	0.870811	83.6333
GOTERM_BP_FAT	GO:0006208~pyrimidine base catabolic process	2	0.328947	0.0983813	ENSG00000147647, ENSG00000188641	460	3	13528	19.6058	1	0.870803	83.8695
GOTERM_BP_FAT	GO:0050862~positive regulation of T cell receptor signaling pathway	2	0.328947	0.0983813	ENSG00000163519, ENSG00000182866	460	3	13528	19.6058	1	0.870803	83.8695
GOTERM_BP_FAT	GO:0046113~nucleobase catabolic process	2	0.328947	0.0983813	ENSG00000147647, ENSG00000188641	460	3	13528	19.6058	1	0.870803	83.8695
GOTERM_BP_FAT	GO:0043570~maintenance of DNA repeat elements	2	0.328947	0.0983813	ENSG00000116062, ENSG00000095002	460	3	13528	19.6058	1	0.870803	83.8695
GOTERM_BP_FAT	GO:0019859~thymine metabolic process	2	0.328947	0.0983813	ENSG00000147647, ENSG00000188641	460	3	13528	19.6058	1	0.870803	83.8695
GOTERM_BP_FAT	GO:0006210~thymine catabolic process	2	0.328947	0.0983813	ENSG00000147647, ENSG00000188641	460	3	13528	19.6058	1	0.870803	83.8695
GOTERM_BP_FAT	GO:0006412~translation	17	2.79605	0.0989415	ENSG00000134684, ENSG00000167526, ENSG00000130348, ENSG00000100129, ENSG00000198015, ENSG00000147604, ENSG00000135930, ENSG00000120705, ENSG00000104408, ENSG00000090263, ENSG00000140105, ENSG00000114867, ENSG00000145191, ENSG00000100316, ENSG00000117593, ENSG00000130255, ENSG00000084623	460	331	13528	1.51042	1	0.870278	84.0452
GOTERM_BP_FAT	GO:0044093~positive regulation of molecular function	27	4.44079	0.0989613	ENSG00000177889, ENSG00000114446, ENSG00000064393, ENSG00000018280, ENSG00000124205, ENSG00000141404, ENSG00000100151, ENSG00000170312, ENSG00000145431, ENSG00000100311, ENSG00000182866, ENSG00000181163, ENSG00000137462, ENSG00000095002, ENSG00000116062, ENSG00000178607, ENSG00000100065, ENSG00000103035, ENSG00000147601, ENSG00000163806, ENSG00000175166, ENSG00000139132, ENSG00000160808, ENSG0000…	460	586	13528	1.35501	1	0.868231	84.0514
GOTERM_BP_FAT	GO:0034504~protein localization in nucleus	7	1.15132	0.0999178	ENSG00000106571, ENSG00000183255, ENSG00000182481, ENSG00000018280, ENSG00000114423, ENSG00000113916, ENSG00000025800	460	94	13528	2.19001	1	0.868844	84.347
Pathway:
Category	Term	Count	%	PValue	Genes	List Total	Pop Hits	Pop Total	Fold Enrichment	Bonferroni	Benjamini	FDR
KEGG_PATHWAY	hsa04360:Axon guidance	10	1.64474	0.0419394	ENSG00000182580, ENSG00000082701, ENSG00000128340, ENSG00000134318, ENSG00000102908, ENSG00000182168, ENSG00000044524, ENSG00000184347, ENSG00000101349, ENSG00000187446	184	129	5085	2.14232	0.997721	0.997721	39.7566
KEGG_PATHWAY	hsa05200:Pathways in cancer	19	3.125	0.0466042	ENSG00000116062, ENSG00000106571, ENSG00000183230, ENSG00000128340, ENSG00000163482, ENSG00000114354, ENSG00000114423, ENSG00000161202, ENSG00000157764, ENSG00000196569, ENSG00000156427, ENSG00000164930, ENSG00000039068, ENSG00000082701, ENSG00000100311, ENSG00000134954, ENSG00000159216, ENSG00000116478, ENSG00000095002	184	328	5085	1.60086	0.99886	0.96624	43.1361
KEGG_PATHWAY	hsa00240:Pyrimidine metabolism	8	1.31579	0.0540565	ENSG00000143179, ENSG00000147647, ENSG00000100142, ENSG00000171848, ENSG00000188641, ENSG00000047230, ENSG00000143156, ENSG00000163882	184	95	5085	2.32723	0.999626	0.927952	48.1767
KEGG_PATHWAY	hsa04080:Neuroactive ligand-receptor interaction	15	2.46711	0.0759423	ENSG00000126010, ENSG00000174417, ENSG00000128310, ENSG00000145864, ENSG00000145863, ENSG00000121853, ENSG00000180616, ENSG00000164418, ENSG00000125675, ENSG00000179603, ENSG00000135577, ENSG00000022355, ENSG00000094755, ENSG00000136928, ENSG00000113327	184	256	5085	1.61929	0.999987	0.939422	60.7105
KEGG_PATHWAY	hsa05210:Colorectal cancer	7	1.15132	0.0808443	ENSG00000116062, ENSG00000164930, ENSG00000082701, ENSG00000128340, ENSG00000095002, ENSG00000161202, ENSG00000157764	184	84	5085	2.30299	0.999994	0.908746	63.1062
KEGG_PATHWAY	hsa04310:Wnt signaling pathway	10	1.64474	0.0930722	ENSG00000164930, ENSG00000082701, ENSG00000128340, ENSG00000134318, ENSG00000145423, ENSG00000072803, ENSG00000102908, ENSG00000101333, ENSG00000161202, ENSG00000187446	184	151	5085	1.83019	0.999999	0.900943	68.5113

## Sheet: RH_WL
BP:
Category	Term	Count	%	PValue	Genes	List Total	Pop Hits	Pop Total	Fold Enrichment	Bonferroni	Benjamini	FDR
GOTERM_BP_FAT	GO:0001501~skeletal system development	35	4.01376	1.74477e-05	ENSG00000105894, ENSG00000157017, ENSG00000196923, ENSG00000169762, ENSG00000163064, ENSG00000146648, ENSG00000112280, ENSG00000090539, ENSG00000111049, ENSG00000156427, ENSG00000171791, ENSG00000104447, ENSG00000036828, ENSG00000118523, ENSG00000164690, ENSG00000145192, ENSG00000132031, ENSG00000124813, ENSG00000072840, ENSG00000166509, ENSG00000075388, ENSG00000038295, ENSG00000186153, ENSG0000…	665	319	13528	2.23197	0.0487592	0.0487592	0.0312519
GOTERM_BP_FAT	GO:0001503~ossification	17	1.94954	0.000152029	ENSG00000105894, ENSG00000124813, ENSG00000196923, ENSG00000186153, ENSG00000107789, ENSG00000111341, ENSG00000146648, ENSG00000090539, ENSG00000156427, ENSG00000182197, ENSG00000171791, ENSG00000172845, ENSG00000036828, ENSG00000141655, ENSG00000118523, ENSG00000164690, ENSG00000145192	665	115	13528	3.0072	0.353121	0.195712	0.272001
GOTERM_BP_FAT	GO:0060348~bone development	17	1.94954	0.000333859	ENSG00000105894, ENSG00000124813, ENSG00000196923, ENSG00000186153, ENSG00000107789, ENSG00000111341, ENSG00000146648, ENSG00000090539, ENSG00000156427, ENSG00000182197, ENSG00000171791, ENSG00000172845, ENSG00000036828, ENSG00000141655, ENSG00000118523, ENSG00000164690, ENSG00000145192	665	123	13528	2.81161	0.615828	0.273043	0.596402
GOTERM_BP_FAT	GO:0007167~enzyme linked receptor protein signaling pathway	33	3.7844	0.00035331	ENSG00000105894, ENSG00000119729, ENSG00000185483, ENSG00000128342, ENSG00000152894, ENSG00000150630, ENSG00000146648, ENSG00000090539, ENSG00000156427, ENSG00000100151, ENSG00000149177, ENSG00000136754, ENSG00000145431, ENSG00000146247, ENSG00000118523, ENSG00000047936, ENSG00000078579, ENSG00000120693, ENSG00000075388, ENSG00000186895, ENSG00000119681, ENSG00000169047, ENSG00000170873, ENSG0000…	665	342	13528	1.96291	0.636659	0.223612	0.631046
GOTERM_BP_FAT	GO:0048666~neuron development	32	3.66972	0.000641069	ENSG00000157017, ENSG00000128342, ENSG00000163064, ENSG00000168385, ENSG00000146648, ENSG00000100151, ENSG00000106852, ENSG00000171791, ENSG00000131238, ENSG00000006607, ENSG00000164690, ENSG00000171587, ENSG00000149557, ENSG00000112367, ENSG00000101977, ENSG00000021645, ENSG00000136535, ENSG00000185532, ENSG00000145147, ENSG00000162631, ENSG00000127603, ENSG00000058866, ENSG00000182580, ENSG0000…	665	339	13528	1.92027	0.840745	0.307502	1.14223
GOTERM_BP_FAT	GO:0007169~transmembrane receptor protein tyrosine kinase signaling pathway	24	2.75229	0.000661329	ENSG00000185483, ENSG00000075388, ENSG00000119729, ENSG00000186895, ENSG00000169047, ENSG00000170873, ENSG00000150630, ENSG00000146648, ENSG00000156427, ENSG00000100151, ENSG00000149177, ENSG00000182580, ENSG00000136754, ENSG00000145431, ENSG00000099250, ENSG00000171150, ENSG00000146247, ENSG00000166225, ENSG00000160867, ENSG00000170145, ENSG00000118523, ENSG00000047936, ENSG00000169398, ENSG0000…	665	224	13528	2.17959	0.849732	0.27086	1.17813
GOTERM_BP_FAT	GO:0045184~establishment of protein localization	57	6.5367	0.00191091	ENSG00000079950, ENSG00000188419, ENSG00000198586, ENSG00000119396, ENSG00000002919, ENSG00000138190, ENSG00000099246, ENSG00000131238, ENSG00000138750, ENSG00000104447, ENSG00000173273, ENSG00000111581, ENSG00000169228, ENSG00000149823, ENSG00000138823, ENSG00000119681, ENSG00000120251, ENSG00000108424, ENSG00000168818, ENSG00000075790, ENSG00000185009, ENSG00000145087, ENSG00000143878, ENSG0000…	665	769	13528	1.50786	0.995831	0.542901	3.36851
GOTERM_BP_FAT	GO:0001568~blood vessel development	24	2.75229	0.00219455	ENSG00000168214, ENSG00000169946, ENSG00000178878, ENSG00000122861, ENSG00000188419, ENSG00000150630, ENSG00000084674, ENSG00000145147, ENSG00000143878, ENSG00000108175, ENSG00000156427, ENSG00000149177, ENSG00000007952, ENSG00000172893, ENSG00000151617, ENSG00000099250, ENSG00000129170, ENSG00000121966, ENSG00000118523, ENSG00000169398, ENSG00000164690, ENSG00000179776, ENSG00000004399, ENSG0000…	665	245	13528	1.99277	0.998153	0.544695	3.85928
GOTERM_BP_FAT	GO:0008543~fibroblast growth factor receptor signaling pathway	7	0.802752	0.00246425	ENSG00000075388, ENSG00000166225, ENSG00000186895, ENSG00000160867, ENSG00000118523, ENSG00000078579, ENSG00000156427	665	29	13528	4.91034	0.999149	0.544073	4.32375
GOTERM_BP_FAT	GO:0015031~protein transport	56	6.42202	0.00250578	ENSG00000079950, ENSG00000188419, ENSG00000198586, ENSG00000119396, ENSG00000002919, ENSG00000138190, ENSG00000099246, ENSG00000131238, ENSG00000138750, ENSG00000104447, ENSG00000173273, ENSG00000111581, ENSG00000149823, ENSG00000169228, ENSG00000138823, ENSG00000119681, ENSG00000108424, ENSG00000168818, ENSG00000075790, ENSG00000185009, ENSG00000145087, ENSG00000143878, ENSG00000127603, ENSG0000…	665	762	13528	1.49501	0.999244	0.512667	4.39508
GOTERM_BP_FAT	GO:0008104~protein localization	63	7.22477	0.00257706	ENSG00000079950, ENSG00000152894, ENSG00000188419, ENSG00000198586, ENSG00000146648, ENSG00000119396, ENSG00000002919, ENSG00000138190, ENSG00000099246, ENSG00000131238, ENSG00000138750, ENSG00000104447, ENSG00000173273, ENSG00000111581, ENSG00000169228, ENSG00000149823, ENSG00000138823, ENSG00000119681, ENSG00000120251, ENSG00000108424, ENSG00000168818, ENSG00000075790, ENSG00000185009, ENSG0000…	665	882	13528	1.45306	0.999384	0.489351	4.51738
GOTERM_BP_FAT	GO:0001944~vasculature development	24	2.75229	0.00300577	ENSG00000168214, ENSG00000169946, ENSG00000178878, ENSG00000122861, ENSG00000188419, ENSG00000150630, ENSG00000084674, ENSG00000145147, ENSG00000143878, ENSG00000108175, ENSG00000156427, ENSG00000149177, ENSG00000007952, ENSG00000172893, ENSG00000151617, ENSG00000099250, ENSG00000129170, ENSG00000121966, ENSG00000118523, ENSG00000169398, ENSG00000164690, ENSG00000179776, ENSG00000004399, ENSG0000…	665	251	13528	1.94513	0.99982	0.512619	5.24994
GOTERM_BP_FAT	GO:0030182~neuron differentiation	36	4.12844	0.00313005	ENSG00000157017, ENSG00000128342, ENSG00000163064, ENSG00000168385, ENSG00000146648, ENSG00000100151, ENSG00000105928, ENSG00000106852, ENSG00000131238, ENSG00000171791, ENSG00000006607, ENSG00000164690, ENSG00000078579, ENSG00000174672, ENSG00000112367, ENSG00000171587, ENSG00000149557, ENSG00000101977, ENSG00000021645, ENSG00000136535, ENSG00000185532, ENSG00000145147, ENSG00000162631, ENSG0000…	665	438	13528	1.67202	0.999874	0.498874	5.4613
GOTERM_BP_FAT	GO:0051216~cartilage development	11	1.26147	0.00318094	ENSG00000124813, ENSG00000072840, ENSG00000075388, ENSG00000157017, ENSG00000163132, ENSG00000118523, ENSG00000111341, ENSG00000180318, ENSG00000112280, ENSG00000111049, ENSG00000156427	665	74	13528	3.02394	0.999891	0.478994	5.54772
GOTERM_BP_FAT	GO:0030030~cell projection organization	31	3.55505	0.00452303	ENSG00000157017, ENSG00000154783, ENSG00000168385, ENSG00000146648, ENSG00000171791, ENSG00000164690, ENSG00000198087, ENSG00000171587, ENSG00000149557, ENSG00000021645, ENSG00000101977, ENSG00000136535, ENSG00000170873, ENSG00000185532, ENSG00000145147, ENSG00000162631, ENSG00000131437, ENSG00000127603, ENSG00000182580, ENSG00000099250, ENSG00000121966, ENSG00000163394, ENSG00000112782, ENSG0000…	665	368	13528	1.71366	0.999998	0.57931	7.8001
GOTERM_BP_FAT	GO:0034613~cellular protein localization	33	3.7844	0.00671459	ENSG00000079950, ENSG00000152894, ENSG00000169760, ENSG00000188419, ENSG00000198586, ENSG00000114030, ENSG00000146648, ENSG00000108733, ENSG00000100151, ENSG00000181163, ENSG00000138750, ENSG00000104447, ENSG00000173273, ENSG00000119681, ENSG00000131558, ENSG00000108424, ENSG00000075790, ENSG00000168818, ENSG00000185009, ENSG00000132432, ENSG00000127603, ENSG00000006125, ENSG00000130340, ENSG0000…	665	411	13528	1.63337	1	0.700723	11.3694
GOTERM_BP_FAT	GO:0070727~cellular macromolecule localization	33	3.7844	0.00743441	ENSG00000079950, ENSG00000152894, ENSG00000169760, ENSG00000188419, ENSG00000198586, ENSG00000114030, ENSG00000146648, ENSG00000108733, ENSG00000100151, ENSG00000181163, ENSG00000138750, ENSG00000104447, ENSG00000173273, ENSG00000119681, ENSG00000131558, ENSG00000108424, ENSG00000075790, ENSG00000168818, ENSG00000185009, ENSG00000132432, ENSG00000127603, ENSG00000006125, ENSG00000130340, ENSG0000…	665	414	13528	1.62153	1	0.715664	12.5131
GOTERM_BP_FAT	GO:0031175~neuron projection development	23	2.63761	0.00768893	ENSG00000157017, ENSG00000171587, ENSG00000149557, ENSG00000101977, ENSG00000021645, ENSG00000136535, ENSG00000168385, ENSG00000185532, ENSG00000145147, ENSG00000162631, ENSG00000146648, ENSG00000127603, ENSG00000182580, ENSG00000099250, ENSG00000171791, ENSG00000121966, ENSG00000163394, ENSG00000165300, ENSG00000148498, ENSG00000169398, ENSG00000164690, ENSG00000163697, ENSG00000069869	665	256	13528	1.82768	1	0.707283	12.9141
GOTERM_BP_FAT	GO:0048514~blood vessel morphogenesis	20	2.29358	0.00792186	ENSG00000168214, ENSG00000169946, ENSG00000178878, ENSG00000122861, ENSG00000150630, ENSG00000084674, ENSG00000145147, ENSG00000143878, ENSG00000108175, ENSG00000156427, ENSG00000149177, ENSG00000007952, ENSG00000151617, ENSG00000099250, ENSG00000129170, ENSG00000121966, ENSG00000118523, ENSG00000169398, ENSG00000164690, ENSG00000004399	665	211	13528	1.92823	1	0.698592	13.2795
GOTERM_BP_FAT	GO:0051271~negative regulation of cell motion	9	1.03211	0.0115293	ENSG00000171791, ENSG00000152894, ENSG00000107937, ENSG00000148498, ENSG00000164690, ENSG00000140416, ENSG00000111276, ENSG00000035403, ENSG00000090539	665	63	13528	2.90612	1	0.810084	18.7583
GOTERM_BP_FAT	GO:0035295~tube development	20	2.29358	0.0120775	ENSG00000169946, ENSG00000077092, ENSG00000111341, ENSG00000145147, ENSG00000156427, ENSG00000172893, ENSG00000164930, ENSG00000147571, ENSG00000151617, ENSG00000099250, ENSG00000171791, ENSG00000160867, ENSG00000114739, ENSG00000121966, ENSG00000172845, ENSG00000118523, ENSG00000120868, ENSG00000164690, ENSG00000180318, ENSG00000004399	665	220	13528	1.84935	1	0.809433	19.5616
GOTERM_BP_FAT	GO:0001502~cartilage condensation	5	0.573394	0.0123622	ENSG00000075388, ENSG00000118523, ENSG00000111341, ENSG00000180318, ENSG00000111049	665	19	13528	5.35338	1	0.802087	19.9758
GOTERM_BP_FAT	GO:0043009~chordate embryonic development	27	3.09633	0.0124635	ENSG00000142731, ENSG00000169946, ENSG00000169762, ENSG00000163064, ENSG00000139618, ENSG00000084674, ENSG00000111046, ENSG00000090539, ENSG00000111049, ENSG00000129562, ENSG00000164930, ENSG00000164690, ENSG00000168214, ENSG00000150093, ENSG00000163132, ENSG00000151379, ENSG00000108175, ENSG00000092140, ENSG00000100146, ENSG00000151617, ENSG00000106804, ENSG00000172845, ENSG00000120868, ENSG0000…	665	331	13528	1.65939	1	0.79034	20.1227
GOTERM_BP_FAT	GO:0009792~embryonic development ending in birth or egg hatching	27	3.09633	0.0137197	ENSG00000142731, ENSG00000169946, ENSG00000169762, ENSG00000163064, ENSG00000139618, ENSG00000084674, ENSG00000111046, ENSG00000090539, ENSG00000111049, ENSG00000129562, ENSG00000164930, ENSG00000164690, ENSG00000168214, ENSG00000150093, ENSG00000163132, ENSG00000151379, ENSG00000108175, ENSG00000092140, ENSG00000100146, ENSG00000151617, ENSG00000106804, ENSG00000172845, ENSG00000120868, ENSG0000…	665	334	13528	1.64448	1	0.807784	21.9236
GOTERM_BP_FAT	GO:0030278~regulation of ossification	10	1.14679	0.0138985	ENSG00000124813, ENSG00000165973, ENSG00000196923, ENSG00000171791, ENSG00000114739, ENSG00000151090, ENSG00000111341, ENSG00000154122, ENSG00000145192, ENSG00000090539	665	78	13528	2.60806	1	0.798896	22.1767
GOTERM_BP_FAT	GO:0001525~angiogenesis	15	1.72018	0.0140649	ENSG00000168214, ENSG00000007952, ENSG00000151617, ENSG00000099250, ENSG00000178878, ENSG00000121966, ENSG00000122861, ENSG00000150630, ENSG00000118523, ENSG00000145147, ENSG00000164690, ENSG00000169398, ENSG00000143878, ENSG00000004399, ENSG00000156427	665	148	13528	2.06178	1	0.790041	22.4116
GOTERM_BP_FAT	GO:0006928~cell motion	35	4.01376	0.017628	ENSG00000187957, ENSG00000152894, ENSG00000122861, ENSG00000206075, ENSG00000084674, ENSG00000150630, ENSG00000122585, ENSG00000007952, ENSG00000131236, ENSG00000106852, ENSG00000164932, ENSG00000118523, ENSG00000164690, ENSG00000157193, ENSG00000198087, ENSG00000150093, ENSG00000149557, ENSG00000021645, ENSG00000136535, ENSG00000170873, ENSG00000185532, ENSG00000145147, ENSG00000112290, ENSG0000…	665	475	13528	1.49895	1	0.848506	27.2842
GOTERM_BP_FAT	GO:0001569~patterning of blood vessels	5	0.573394	0.017666	ENSG00000151617, ENSG00000099250, ENSG00000121966, ENSG00000164690, ENSG00000004399	665	21	13528	4.84354	1	0.838584	27.3346
GOTERM_BP_FAT	GO:0007507~heart development	19	2.1789	0.0190813	ENSG00000168214, ENSG00000150093, ENSG00000169946, ENSG00000114279, ENSG00000077092, ENSG00000163132, ENSG00000131437, ENSG00000154734, ENSG00000108175, ENSG00000149177, ENSG00000151617, ENSG00000099250, ENSG00000159307, ENSG00000114739, ENSG00000129170, ENSG00000117298, ENSG00000164690, ENSG00000140416, ENSG00000162344	665	215	13528	1.79774	1	0.850926	29.1874
GOTERM_BP_FAT	GO:0007267~cell-cell signaling	42	4.81651	0.0199356	ENSG00000102466, ENSG00000157017, ENSG00000135643, ENSG00000169760, ENSG00000109738, ENSG00000148660, ENSG00000119396, ENSG00000122585, ENSG00000156427, ENSG00000149177, ENSG00000128683, ENSG00000131238, ENSG00000114013, ENSG00000136750, ENSG00000164690, ENSG00000078579, ENSG00000165970, ENSG00000075388, ENSG00000198010, ENSG00000186895, ENSG00000114279, ENSG00000021645, ENSG00000120251, ENSG0000…	665	600	13528	1.424	1	0.853844	30.2841
GOTERM_BP_FAT	GO:0007569~cell aging	6	0.688073	0.0212958	ENSG00000171791, ENSG00000181163, ENSG00000139618, ENSG00000147601, ENSG00000159256, ENSG00000108175	665	33	13528	3.6987	1	0.863222	31.9972
GOTERM_BP_FAT	GO:0046907~intracellular transport	45	5.16055	0.0222469	ENSG00000079950, ENSG00000169760, ENSG00000188419, ENSG00000142197, ENSG00000198586, ENSG00000119396, ENSG00000114030, ENSG00000108733, ENSG00000100151, ENSG00000092108, ENSG00000164597, ENSG00000181163, ENSG00000171791, ENSG00000138750, ENSG00000104447, ENSG00000111581, ENSG00000177951, ENSG00000188529, ENSG00000167996, ENSG00000119681, ENSG00000131558, ENSG00000083097, ENSG00000108424, ENSG0000…	665	657	13528	1.39335	1	0.866584	33.1715
GOTERM_BP_FAT	GO:0007389~pattern specification process	22	2.52294	0.0225727	ENSG00000168214, ENSG00000095596, ENSG00000163064, ENSG00000198576, ENSG00000151379, ENSG00000164651, ENSG00000158055, ENSG00000111046, ENSG00000131437, ENSG00000090539, ENSG00000111049, ENSG00000120697, ENSG00000151617, ENSG00000099250, ENSG00000166225, ENSG00000176225, ENSG00000114739, ENSG00000121966, ENSG00000187553, ENSG00000164690, ENSG00000180318, ENSG00000004399	665	267	13528	1.67619	1	0.862231	33.5692
GOTERM_BP_FAT	GO:0003001~generation of a signal involved in cell-cell signaling	10	1.14679	0.0232499	ENSG00000157017, ENSG00000021645, ENSG00000111052, ENSG00000114739, ENSG00000169760, ENSG00000164756, ENSG00000079841, ENSG00000148660, ENSG00000119396, ENSG00000091428	665	85	13528	2.39328	1	0.862246	34.389
GOTERM_BP_FAT	GO:0006461~protein complex assembly	36	4.12844	0.0249687	ENSG00000180182, ENSG00000160131, ENSG00000163145, ENSG00000109738, ENSG00000163882, ENSG00000100151, ENSG00000145431, ENSG00000181163, ENSG00000159307, ENSG00000105926, ENSG00000148175, ENSG00000198087, ENSG00000056558, ENSG00000185437, ENSG00000164758, ENSG00000169047, ENSG00000135679, ENSG00000108424, ENSG00000147601, ENSG00000111341, ENSG00000112290, ENSG00000109107, ENSG00000148180, ENSG0000…	665	505	13528	1.45018	1	0.873791	36.4268
GOTERM_BP_FAT	GO:0070271~protein complex biogenesis	36	4.12844	0.0249687	ENSG00000180182, ENSG00000160131, ENSG00000163145, ENSG00000109738, ENSG00000163882, ENSG00000100151, ENSG00000145431, ENSG00000181163, ENSG00000159307, ENSG00000105926, ENSG00000148175, ENSG00000198087, ENSG00000056558, ENSG00000185437, ENSG00000164758, ENSG00000169047, ENSG00000135679, ENSG00000108424, ENSG00000147601, ENSG00000111341, ENSG00000112290, ENSG00000109107, ENSG00000148180, ENSG0000…	665	505	13528	1.45018	1	0.873791	36.4268
GOTERM_BP_FAT	GO:0009791~post-embryonic development	9	1.03211	0.0261961	ENSG00000172893, ENSG00000171587, ENSG00000171791, ENSG00000169762, ENSG00000159307, ENSG00000114739, ENSG00000084674, ENSG00000159256, ENSG00000146085	665	73	13528	2.50802	1	0.879073	37.8453
GOTERM_BP_FAT	GO:0001701~in utero embryonic development	16	1.83486	0.0266052	ENSG00000142731, ENSG00000150093, ENSG00000169946, ENSG00000169762, ENSG00000139618, ENSG00000084674, ENSG00000163132, ENSG00000108175, ENSG00000092140, ENSG00000129562, ENSG00000100146, ENSG00000151617, ENSG00000106804, ENSG00000172845, ENSG00000140416, ENSG00000177963	665	176	13528	1.84935	1	0.876066	38.3114
GOTERM_BP_FAT	GO:0048667~cell morphogenesis involved in neuron differentiation	18	2.06422	0.0284937	ENSG00000171587, ENSG00000149557, ENSG00000021645, ENSG00000136535, ENSG00000145147, ENSG00000162631, ENSG00000127603, ENSG00000182580, ENSG00000099250, ENSG00000171791, ENSG00000121966, ENSG00000112782, ENSG00000163394, ENSG00000165300, ENSG00000148498, ENSG00000169398, ENSG00000164690, ENSG00000163697	665	209	13528	1.75202	1	0.886899	40.4206
GOTERM_BP_FAT	GO:0048598~embryonic morphogenesis	24	2.75229	0.0290063	ENSG00000075388, ENSG00000077092, ENSG00000163064, ENSG00000150630, ENSG00000163132, ENSG00000145147, ENSG00000164651, ENSG00000127603, ENSG00000090539, ENSG00000111049, ENSG00000182197, ENSG00000164930, ENSG00000139304, ENSG00000166225, ENSG00000102710, ENSG00000114739, ENSG00000112782, ENSG00000172845, ENSG00000165671, ENSG00000120868, ENSG00000174343, ENSG00000117298, ENSG00000164690, ENSG0000…	665	307	13528	1.59032	1	0.884947	40.9812
GOTERM_BP_FAT	GO:0006886~intracellular protein transport	28	3.21101	0.0290585	ENSG00000079950, ENSG00000169760, ENSG00000188419, ENSG00000198586, ENSG00000114030, ENSG00000108733, ENSG00000100151, ENSG00000181163, ENSG00000138750, ENSG00000104447, ENSG00000131558, ENSG00000119681, ENSG00000108424, ENSG00000075790, ENSG00000168818, ENSG00000185009, ENSG00000132432, ENSG00000127603, ENSG00000006125, ENSG00000130340, ENSG00000138814, ENSG00000142676, ENSG00000174780, ENSG0000…	665	374	13528	1.52299	1	0.879023	41.0381
GOTERM_BP_FAT	GO:0040013~negative regulation of locomotion	8	0.917431	0.0291644	ENSG00000157017, ENSG00000171791, ENSG00000152894, ENSG00000107937, ENSG00000164690, ENSG00000140416, ENSG00000035403, ENSG00000090539	665	61	13528	2.66792	1	0.873595	41.1532
GOTERM_BP_FAT	GO:0016477~cell migration	22	2.52294	0.0309851	ENSG00000150093, ENSG00000187957, ENSG00000152894, ENSG00000122861, ENSG00000150630, ENSG00000185532, ENSG00000145147, ENSG00000007952, ENSG00000131236, ENSG00000106852, ENSG00000099250, ENSG00000121966, ENSG00000163394, ENSG00000164438, ENSG00000164932, ENSG00000118523, ENSG00000169398, ENSG00000164690, ENSG00000157193, ENSG00000163697, ENSG00000162344, ENSG00000198087	665	276	13528	1.62153	1	0.883174	43.0992
GOTERM_BP_FAT	GO:0001666~response to hypoxia	13	1.49083	0.0319826	ENSG00000178878, ENSG00000122861, ENSG00000197635, ENSG00000170893, ENSG00000109107, ENSG00000151617, ENSG00000171791, ENSG00000121966, ENSG00000181092, ENSG00000198626, ENSG00000164690, ENSG00000117298, ENSG00000120693	665	134	13528	1.97356	1	0.885337	44.1395
GOTERM_BP_FAT	GO:0048812~neuron projection morphogenesis	18	2.06422	0.0333294	ENSG00000171587, ENSG00000149557, ENSG00000021645, ENSG00000136535, ENSG00000145147, ENSG00000162631, ENSG00000146648, ENSG00000127603, ENSG00000182580, ENSG00000099250, ENSG00000171791, ENSG00000121966, ENSG00000163394, ENSG00000165300, ENSG00000148498, ENSG00000169398, ENSG00000164690, ENSG00000163697	665	213	13528	1.71911	1	0.88999	45.5154
GOTERM_BP_FAT	GO:0065003~macromolecular complex assembly	44	5.04587	0.0372803	ENSG00000160131, ENSG00000180182, ENSG00000163145, ENSG00000084674, ENSG00000109738, ENSG00000163882, ENSG00000100151, ENSG00000145431, ENSG00000181163, ENSG00000159307, ENSG00000105926, ENSG00000148175, ENSG00000184357, ENSG00000198087, ENSG00000188529, ENSG00000197837, ENSG00000056558, ENSG00000185437, ENSG00000164758, ENSG00000169047, ENSG00000135679, ENSG00000108424, ENSG00000147601, ENSG0000…	665	665	13528	1.34599	1	0.91098	49.3698
GOTERM_BP_FAT	GO:0048762~mesenchymal cell differentiation	7	0.802752	0.0377631	ENSG00000151617, ENSG00000095596, ENSG00000171791, ENSG00000187553, ENSG00000164690, ENSG00000180318, ENSG00000162344	665	51	13528	2.79216	1	0.909059	49.8227
GOTERM_BP_FAT	GO:0014031~mesenchymal cell development	7	0.802752	0.0377631	ENSG00000151617, ENSG00000095596, ENSG00000171791, ENSG00000187553, ENSG00000164690, ENSG00000180318, ENSG00000162344	665	51	13528	2.79216	1	0.909059	49.8227
GOTERM_BP_FAT	GO:0022610~biological adhesion	46	5.27523	0.0385273	ENSG00000152894, ENSG00000169760, ENSG00000155052, ENSG00000165478, ENSG00000146648, ENSG00000105855, ENSG00000112280, ENSG00000139220, ENSG00000111049, ENSG00000165973, ENSG00000162804, ENSG00000171791, ENSG00000102181, ENSG00000109072, ENSG00000146242, ENSG00000118523, ENSG00000051382, ENSG00000169031, ENSG00000198087, ENSG00000150093, ENSG00000075388, ENSG00000149557, ENSG00000171587, ENSG0000…	665	701	13528	1.33491	1	0.908824	50.5318
GOTERM_BP_FAT	GO:0016192~vesicle-mediated transport	39	4.47248	0.0388426	ENSG00000079950, ENSG00000196923, ENSG00000187957, ENSG00000169760, ENSG00000142197, ENSG00000109738, ENSG00000119396, ENSG00000138190, ENSG00000100151, ENSG00000092108, ENSG00000131236, ENSG00000099246, ENSG00000139190, ENSG00000164597, ENSG00000131238, ENSG00000157193, ENSG00000177951, ENSG00000145192, ENSG00000144674, ENSG00000167996, ENSG00000131558, ENSG00000120251, ENSG00000083097, ENSG0000…	665	576	13528	1.37738	1	0.906017	50.8216
GOTERM_BP_FAT	GO:0007155~cell adhesion	46	5.27523	0.0392464	ENSG00000152894, ENSG00000169760, ENSG00000155052, ENSG00000165478, ENSG00000146648, ENSG00000105855, ENSG00000112280, ENSG00000139220, ENSG00000111049, ENSG00000165973, ENSG00000162804, ENSG00000171791, ENSG00000102181, ENSG00000109072, ENSG00000146242, ENSG00000118523, ENSG00000051382, ENSG00000169031, ENSG00000198087, ENSG00000150093, ENSG00000075388, ENSG00000149557, ENSG00000171587, ENSG0000…	665	700	13528	1.33682	1	0.903765	51.1905
GOTERM_BP_FAT	GO:0060541~respiratory system development	11	1.26147	0.0392917	ENSG00000172893, ENSG00000147571, ENSG00000169946, ENSG00000160867, ENSG00000114739, ENSG00000172845, ENSG00000118523, ENSG00000164690, ENSG00000111341, ENSG00000131620, ENSG00000156427	665	108	13528	2.07196	1	0.899424	51.2317
GOTERM_BP_FAT	GO:0016311~dephosphorylation	14	1.6055	0.0397736	ENSG00000110786, ENSG00000156194, ENSG00000152894, ENSG00000078269, ENSG00000172840, ENSG00000149177, ENSG00000139304, ENSG00000138814, ENSG00000143507, ENSG00000171791, ENSG00000127329, ENSG00000063601, ENSG00000100330, ENSG00000120875	665	154	13528	1.84935	1	0.897715	51.668
GOTERM_BP_FAT	GO:0051781~positive regulation of cell division	6	0.688073	0.040696	ENSG00000105894, ENSG00000075388, ENSG00000145431, ENSG00000186895, ENSG00000150630, ENSG00000121691	665	39	13528	3.12967	1	0.898642	52.493
GOTERM_BP_FAT	GO:0030901~midbrain development	4	0.458716	0.0408871	ENSG00000163064, ENSG00000163132, ENSG00000164690, ENSG00000120693	665	16	13528	5.08571	1	0.895302	52.6623
GOTERM_BP_FAT	GO:0060485~mesenchyme development	7	0.802752	0.0409906	ENSG00000151617, ENSG00000095596, ENSG00000171791, ENSG00000187553, ENSG00000164690, ENSG00000180318, ENSG00000162344	665	52	13528	2.73846	1	0.891457	52.7537
GOTERM_BP_FAT	GO:0042157~lipoprotein metabolic process	9	1.03211	0.0420875	ENSG00000151665, ENSG00000131238, ENSG00000178878, ENSG00000188419, ENSG00000084674, ENSG00000087111, ENSG00000138823, ENSG00000197563, ENSG00000137872	665	80	13528	2.28857	1	0.893526	53.7125
GOTERM_BP_FAT	GO:0009952~anterior/posterior pattern formation	13	1.49083	0.042611	ENSG00000168214, ENSG00000095596, ENSG00000166225, ENSG00000114739, ENSG00000163064, ENSG00000187553, ENSG00000151379, ENSG00000164690, ENSG00000198576, ENSG00000180318, ENSG00000131437, ENSG00000111046, ENSG00000111049	665	140	13528	1.88898	1	0.892237	54.1636
GOTERM_BP_FAT	GO:0007185~transmembrane receptor protein tyrosine phosphatase signaling pathway	3	0.344037	0.0428594	ENSG00000105894, ENSG00000166225, ENSG00000038382	665	7	13528	8.71837	1	0.889393	54.3761
GOTERM_BP_FAT	GO:0043583~ear development	10	1.14679	0.043355	ENSG00000105928, ENSG00000164930, ENSG00000139304, ENSG00000171791, ENSG00000112782, ENSG00000074771, ENSG00000117298, ENSG00000174343, ENSG00000078579, ENSG00000111276	665	95	13528	2.14135	1	0.888016	54.7975
GOTERM_BP_FAT	GO:0007568~aging	11	1.26147	0.0436815	ENSG00000164136, ENSG00000148180, ENSG00000171791, ENSG00000181163, ENSG00000095303, ENSG00000167720, ENSG00000139618, ENSG00000147601, ENSG00000159256, ENSG00000108175, ENSG00000109107	665	110	13528	2.03429	1	0.885693	55.0731
GOTERM_BP_FAT	GO:0070482~response to oxygen levels	13	1.49083	0.0445957	ENSG00000178878, ENSG00000122861, ENSG00000197635, ENSG00000170893, ENSG00000109107, ENSG00000151617, ENSG00000171791, ENSG00000121966, ENSG00000181092, ENSG00000198626, ENSG00000164690, ENSG00000117298, ENSG00000120693	665	141	13528	1.87558	1	0.886776	55.8363
GOTERM_BP_FAT	GO:0045786~negative regulation of cell cycle	9	1.03211	0.044784	ENSG00000171791, ENSG00000152894, ENSG00000147601, ENSG00000196591, ENSG00000146648, ENSG00000163697, ENSG00000143878, ENSG00000110851, ENSG00000111276	665	81	13528	2.26032	1	0.883741	55.992
GOTERM_BP_FAT	GO:0010035~response to inorganic substance	17	1.94954	0.0452533	ENSG00000130508, ENSG00000120251, ENSG00000135643, ENSG00000152894, ENSG00000084674, ENSG00000111341, ENSG00000146648, ENSG00000148180, ENSG00000171791, ENSG00000198626, ENSG00000036828, ENSG00000071967, ENSG00000140416, ENSG00000115705, ENSG00000121691, ENSG00000100983, ENSG00000069869	665	205	13528	1.68697	1	0.882337	56.3777
GOTERM_BP_FAT	GO:0001505~regulation of neurotransmitter levels	8	0.917431	0.0453494	ENSG00000128683, ENSG00000021645, ENSG00000111052, ENSG00000136750, ENSG00000169760, ENSG00000079841, ENSG00000119396, ENSG00000115665	665	67	13528	2.429	1	0.878828	56.4563
GOTERM_BP_FAT	GO:0043933~macromolecular complex subunit organization	46	5.27523	0.0454452	ENSG00000160131, ENSG00000180182, ENSG00000157017, ENSG00000163145, ENSG00000084674, ENSG00000109738, ENSG00000163882, ENSG00000100151, ENSG00000145431, ENSG00000181163, ENSG00000159307, ENSG00000105926, ENSG00000148175, ENSG00000184357, ENSG00000198087, ENSG00000188529, ENSG00000197837, ENSG00000056558, ENSG00000185437, ENSG00000164758, ENSG00000169047, ENSG00000135679, ENSG00000108424, ENSG0000…	665	710	13528	1.31799	1	0.875327	56.5345
GOTERM_BP_FAT	GO:0048547~gut morphogenesis	4	0.458716	0.0478905	ENSG00000100146, ENSG00000171791, ENSG00000114739, ENSG00000164690	665	17	13528	4.78655	1	0.88503	58.4866
GOTERM_BP_FAT	GO:0006730~one-carbon metabolic process	11	1.26147	0.0483933	ENSG00000168748, ENSG00000074410, ENSG00000138382, ENSG00000115548, ENSG00000138738, ENSG00000165671, ENSG00000037474, ENSG00000116984, ENSG00000185238, ENSG00000163738, ENSG00000100151	665	112	13528	1.99796	1	0.883893	58.8775
GOTERM_BP_FAT	GO:0007605~sensory perception of sound	10	1.14679	0.0484508	ENSG00000105928, ENSG00000178602, ENSG00000095777, ENSG00000112782, ENSG00000149972, ENSG00000147684, ENSG00000174343, ENSG00000111276, ENSG00000169031, ENSG00000071127	665	97	13528	2.0972	1	0.88041	58.922
GOTERM_BP_FAT	GO:0051674~localization of cell	23	2.63761	0.048617	ENSG00000150093, ENSG00000187957, ENSG00000152894, ENSG00000122861, ENSG00000150630, ENSG00000084674, ENSG00000185532, ENSG00000145147, ENSG00000007952, ENSG00000131236, ENSG00000106852, ENSG00000099250, ENSG00000121966, ENSG00000163394, ENSG00000164438, ENSG00000164932, ENSG00000118523, ENSG00000169398, ENSG00000164690, ENSG00000157193, ENSG00000163697, ENSG00000162344, ENSG00000198087	665	307	13528	1.52406	1	0.877521	59.0504
GOTERM_BP_FAT	GO:0048870~cell motility	23	2.63761	0.048617	ENSG00000150093, ENSG00000187957, ENSG00000152894, ENSG00000122861, ENSG00000150630, ENSG00000084674, ENSG00000185532, ENSG00000145147, ENSG00000007952, ENSG00000131236, ENSG00000106852, ENSG00000099250, ENSG00000121966, ENSG00000163394, ENSG00000164438, ENSG00000164932, ENSG00000118523, ENSG00000169398, ENSG00000164690, ENSG00000157193, ENSG00000163697, ENSG00000162344, ENSG00000198087	665	307	13528	1.52406	1	0.877521	59.0504
GOTERM_BP_FAT	GO:0032940~secretion by cell	17	1.94954	0.0486703	ENSG00000157017, ENSG00000119681, ENSG00000021645, ENSG00000131558, ENSG00000169760, ENSG00000164756, ENSG00000109738, ENSG00000148660, ENSG00000145087, ENSG00000119396, ENSG00000138190, ENSG00000092108, ENSG00000111052, ENSG00000114739, ENSG00000079841, ENSG00000090989, ENSG00000091428	665	207	13528	1.67067	1	0.87403	59.0914
GOTERM_BP_FAT	GO:0006820~anion transport	13	1.49083	0.0487549	ENSG00000164707, ENSG00000167995, ENSG00000109738, ENSG00000141485, ENSG00000112280, ENSG00000144290, ENSG00000165637, ENSG00000127325, ENSG00000100156, ENSG00000112782, ENSG00000154122, ENSG00000131620, ENSG00000104044	665	143	13528	1.84935	1	0.870717	59.1566
GOTERM_BP_FAT	GO:0030258~lipid modification	8	0.917431	0.0518097	ENSG00000181092, ENSG00000105851, ENSG00000063601, ENSG00000078269, ENSG00000171503, ENSG00000087008, ENSG00000051382, ENSG00000172318	665	69	13528	2.35859	1	0.883135	61.4436
GOTERM_BP_FAT	GO:0010038~response to metal ion	12	1.37615	0.0523687	ENSG00000148180, ENSG00000171791, ENSG00000135643, ENSG00000120251, ENSG00000198626, ENSG00000036828, ENSG00000084674, ENSG00000111341, ENSG00000071967, ENSG00000146648, ENSG00000069869, ENSG00000100983	665	129	13528	1.89236	1	0.882391	61.8488
GOTERM_BP_FAT	GO:0007409~axonogenesis	16	1.83486	0.0529159	ENSG00000149557, ENSG00000021645, ENSG00000136535, ENSG00000145147, ENSG00000162631, ENSG00000127603, ENSG00000182580, ENSG00000099250, ENSG00000171791, ENSG00000121966, ENSG00000163394, ENSG00000165300, ENSG00000148498, ENSG00000169398, ENSG00000164690, ENSG00000163697	665	193	13528	1.68645	1	0.881605	62.2415
GOTERM_BP_FAT	GO:0007368~determination of left/right symmetry	6	0.688073	0.0534121	ENSG00000168214, ENSG00000120697, ENSG00000176225, ENSG00000114739, ENSG00000164690, ENSG00000131437	665	42	13528	2.90612	1	0.88059	62.5943
GOTERM_BP_FAT	GO:0030324~lung development	10	1.14679	0.0539278	ENSG00000172893, ENSG00000147571, ENSG00000169946, ENSG00000160867, ENSG00000114739, ENSG00000172845, ENSG00000118523, ENSG00000164690, ENSG00000111341, ENSG00000156427	665	99	13528	2.05483	1	0.879688	62.9577
GOTERM_BP_FAT	GO:0007369~gastrulation	8	0.917431	0.0552461	ENSG00000166225, ENSG00000102710, ENSG00000114739, ENSG00000165671, ENSG00000145147, ENSG00000127603, ENSG00000090539, ENSG00000182197	665	70	13528	2.3249	1	0.882624	63.8715
GOTERM_BP_FAT	GO:0033032~regulation of myeloid cell apoptosis	3	0.344037	0.0553206	ENSG00000171791, ENSG00000181092, ENSG00000090316	665	8	13528	7.62857	1	0.879666	63.9225
GOTERM_BP_FAT	GO:0042136~neurotransmitter biosynthetic process	3	0.344037	0.0553206	ENSG00000128683, ENSG00000136750, ENSG00000115665	665	8	13528	7.62857	1	0.879666	63.9225
GOTERM_BP_FAT	GO:0000082~G1/S transition of mitotic cell cycle	7	0.802752	0.0556052	ENSG00000138814, ENSG00000150093, ENSG00000171791, ENSG00000108094, ENSG00000148660, ENSG00000146648, ENSG00000111276	665	56	13528	2.54286	1	0.877715	64.1168
GOTERM_BP_FAT	GO:0048610~reproductive cellular process	14	1.6055	0.0556396	ENSG00000150093, ENSG00000177463, ENSG00000139618, ENSG00000109738, ENSG00000134874, ENSG00000108175, ENSG00000100151, ENSG00000164113, ENSG00000165209, ENSG00000171791, ENSG00000121966, ENSG00000164690, ENSG00000118689, ENSG00000104044	665	162	13528	1.75802	1	0.874584	64.1401
GOTERM_BP_FAT	GO:0007517~muscle organ development	17	1.94954	0.056041	ENSG00000072840, ENSG00000150093, ENSG00000169946, ENSG00000187957, ENSG00000128342, ENSG00000077092, ENSG00000082293, ENSG00000163132, ENSG00000150051, ENSG00000111046, ENSG00000141161, ENSG00000111049, ENSG00000138814, ENSG00000129170, ENSG00000140416, ENSG00000184357, ENSG00000144834	665	211	13528	1.639	1	0.873232	64.4123
GOTERM_BP_FAT	GO:0034614~cellular response to reactive oxygen species	5	0.573394	0.057307	ENSG00000130508, ENSG00000152894, ENSG00000140416, ENSG00000115705, ENSG00000121691	665	30	13528	3.39048	1	0.875987	65.2576
GOTERM_BP_FAT	GO:0048858~cell projection morphogenesis	19	2.1789	0.0573975	ENSG00000171587, ENSG00000149557, ENSG00000021645, ENSG00000136535, ENSG00000145147, ENSG00000162631, ENSG00000146648, ENSG00000131437, ENSG00000127603, ENSG00000182580, ENSG00000099250, ENSG00000171791, ENSG00000121966, ENSG00000163394, ENSG00000165300, ENSG00000148498, ENSG00000169398, ENSG00000164690, ENSG00000163697	665	245	13528	1.57761	1	0.873216	65.3174
GOTERM_BP_FAT	GO:0009799~determination of symmetry	6	0.688073	0.0581082	ENSG00000168214, ENSG00000120697, ENSG00000176225, ENSG00000114739, ENSG00000164690, ENSG00000131437	665	43	13528	2.83854	1	0.873362	65.7829
GOTERM_BP_FAT	GO:0009855~determination of bilateral symmetry	6	0.688073	0.0581082	ENSG00000168214, ENSG00000120697, ENSG00000176225, ENSG00000114739, ENSG00000164690, ENSG00000131437	665	43	13528	2.83854	1	0.873362	65.7829
GOTERM_BP_FAT	GO:0030336~negative regulation of cell migration	7	0.802752	0.0596911	ENSG00000171791, ENSG00000152894, ENSG00000107937, ENSG00000164690, ENSG00000140416, ENSG00000035403, ENSG00000090539	665	57	13528	2.49825	1	0.877444	66.7985
GOTERM_BP_FAT	GO:0007268~synaptic transmission	22	2.52294	0.0609893	ENSG00000157017, ENSG00000198010, ENSG00000120251, ENSG00000021645, ENSG00000135643, ENSG00000169760, ENSG00000128310, ENSG00000109738, ENSG00000101188, ENSG00000119396, ENSG00000115665, ENSG00000122585, ENSG00000128683, ENSG00000138814, ENSG00000147571, ENSG00000131238, ENSG00000111052, ENSG00000136750, ENSG00000079841, ENSG00000169398, ENSG00000136928, ENSG00000165970	665	298	13528	1.50182	1	0.880095	67.6101
GOTERM_BP_FAT	GO:0006470~protein amino acid dephosphorylation	12	1.37615	0.0625485	ENSG00000110786, ENSG00000149177, ENSG00000138814, ENSG00000139304, ENSG00000143507, ENSG00000171791, ENSG00000156194, ENSG00000152894, ENSG00000127329, ENSG00000100330, ENSG00000172840, ENSG00000120875	665	133	13528	1.83545	1	0.88372	68.5602
GOTERM_BP_FAT	GO:0033674~positive regulation of kinase activity	18	2.06422	0.0626547	ENSG00000157017, ENSG00000169047, ENSG00000197442, ENSG00000146648, ENSG00000100151, ENSG00000157680, ENSG00000058866, ENSG00000145431, ENSG00000151617, ENSG00000181163, ENSG00000166225, ENSG00000114739, ENSG00000121966, ENSG00000148498, ENSG00000106804, ENSG00000051382, ENSG00000157193, ENSG00000005249	665	231	13528	1.58516	1	0.881252	68.624
GOTERM_BP_FAT	GO:0030323~respiratory tube development	10	1.14679	0.0628733	ENSG00000172893, ENSG00000147571, ENSG00000169946, ENSG00000160867, ENSG00000114739, ENSG00000172845, ENSG00000118523, ENSG00000164690, ENSG00000111341, ENSG00000156427	665	102	13528	1.9944	1	0.879263	68.7548
GOTERM_BP_FAT	GO:0048589~developmental growth	9	1.03211	0.0633332	ENSG00000100146, ENSG00000148180, ENSG00000171791, ENSG00000122861, ENSG00000139618, ENSG00000164690, ENSG00000118689, ENSG00000111046, ENSG00000108175	665	87	13528	2.10443	1	0.878298	69.0283
GOTERM_BP_FAT	GO:0046626~regulation of insulin receptor signaling pathway	4	0.458716	0.0635164	ENSG00000169047, ENSG00000170145, ENSG00000115290, ENSG00000145192	665	19	13528	4.28271	1	0.87619	69.1366
GOTERM_BP_FAT	GO:0042158~lipoprotein biosynthetic process	7	0.802752	0.0639511	ENSG00000151665, ENSG00000188419, ENSG00000084674, ENSG00000087111, ENSG00000138823, ENSG00000197563, ENSG00000137872	665	58	13528	2.45517	1	0.875153	69.3923
GOTERM_BP_FAT	GO:0016197~endosome transport	7	0.802752	0.0639511	ENSG00000083097, ENSG00000142197, ENSG00000131381, ENSG00000143878, ENSG00000119396, ENSG00000177951, ENSG00000119541	665	58	13528	2.45517	1	0.875153	69.3923
GOTERM_BP_FAT	GO:0006605~protein targeting	17	1.94954	0.0641497	ENSG00000131558, ENSG00000119681, ENSG00000169760, ENSG00000108424, ENSG00000185009, ENSG00000114030, ENSG00000132432, ENSG00000127603, ENSG00000108733, ENSG00000100151, ENSG00000138814, ENSG00000174780, ENSG00000142676, ENSG00000138750, ENSG00000104447, ENSG00000109519, ENSG00000069869	665	215	13528	1.6085	1	0.873139	69.5084
GOTERM_BP_FAT	GO:0050954~sensory perception of mechanical stimulus	10	1.14679	0.0660526	ENSG00000105928, ENSG00000178602, ENSG00000095777, ENSG00000112782, ENSG00000149972, ENSG00000147684, ENSG00000174343, ENSG00000111276, ENSG00000169031, ENSG00000071127	665	103	13528	1.97503	1	0.878174	70.6002
GOTERM_BP_FAT	GO:0030384~phosphoinositide metabolic process	8	0.917431	0.0663896	ENSG00000151665, ENSG00000112367, ENSG00000087111, ENSG00000105851, ENSG00000078269, ENSG00000051382, ENSG00000197563, ENSG00000137872	665	73	13528	2.22935	1	0.876778	70.7897
GOTERM_BP_FAT	GO:0040007~growth	15	1.72018	0.0665997	ENSG00000172893, ENSG00000100146, ENSG00000148180, ENSG00000171150, ENSG00000171791, ENSG00000181163, ENSG00000114739, ENSG00000139618, ENSG00000122861, ENSG00000198964, ENSG00000164690, ENSG00000118689, ENSG00000078579, ENSG00000111046, ENSG00000108175	665	183	13528	1.66745	1	0.874884	70.9072
GOTERM_BP_FAT	GO:0042127~regulation of cell proliferation	49	5.61927	0.0676643	ENSG00000105894, ENSG00000157017, ENSG00000128342, ENSG00000152894, ENSG00000111816, ENSG00000122861, ENSG00000095303, ENSG00000139618, ENSG00000150630, ENSG00000146648, ENSG00000154734, ENSG00000156427, ENSG00000080546, ENSG00000007952, ENSG00000172893, ENSG00000136754, ENSG00000137673, ENSG00000145431, ENSG00000181163, ENSG00000171791, ENSG00000114013, ENSG00000077721, ENSG00000108094, ENSG0000…	665	787	13528	1.26658	1	0.876427	71.496
GOTERM_BP_FAT	GO:0010817~regulation of hormone levels	13	1.49083	0.0680216	ENSG00000147571, ENSG00000095596, ENSG00000157017, ENSG00000114739, ENSG00000164756, ENSG00000187553, ENSG00000101187, ENSG00000164690, ENSG00000148660, ENSG00000117298, ENSG00000115705, ENSG00000109472, ENSG00000091428	665	151	13528	1.75137	1	0.875156	71.691
GOTERM_BP_FAT	GO:0009749~response to glucose stimulus	6	0.688073	0.0681854	ENSG00000114739, ENSG00000164756, ENSG00000004139, ENSG00000181092, ENSG00000170893, ENSG00000169031	665	45	13528	2.71238	1	0.873131	71.78
GOTERM_BP_FAT	GO:0042440~pigment metabolic process	6	0.688073	0.0681854	ENSG00000106605, ENSG00000082641, ENSG00000171791, ENSG00000128050, ENSG00000104044, ENSG00000128059	665	45	13528	2.71238	1	0.873131	71.78
GOTERM_BP_FAT	GO:0009411~response to UV	7	0.802752	0.0683852	ENSG00000171791, ENSG00000077721, ENSG00000152894, ENSG00000139618, ENSG00000146648, ENSG00000121691, ENSG00000069869	665	59	13528	2.41356	1	0.871258	71.8882
GOTERM_BP_FAT	GO:0005513~detection of calcium ion	3	0.344037	0.0688646	ENSG00000135643, ENSG00000198626, ENSG00000036828	665	9	13528	6.78095	1	0.870516	72.1463
GOTERM_BP_FAT	GO:0006895~Golgi to endosome transport	3	0.344037	0.0688646	ENSG00000083097, ENSG00000142197, ENSG00000119396	665	9	13528	6.78095	1	0.870516	72.1463
GOTERM_BP_FAT	GO:0045047~protein targeting to ER	3	0.344037	0.0688646	ENSG00000174780, ENSG00000132432, ENSG00000127603	665	9	13528	6.78095	1	0.870516	72.1463
GOTERM_BP_FAT	GO:0007160~cell-matrix adhesion	9	1.03211	0.0704392	ENSG00000150093, ENSG00000162804, ENSG00000171791, ENSG00000152894, ENSG00000109072, ENSG00000140092, ENSG00000118523, ENSG00000105855, ENSG00000139220	665	89	13528	2.05714	1	0.874062	72.9781
GOTERM_BP_FAT	GO:0051181~cofactor transport	4	0.458716	0.0721019	ENSG00000131238, ENSG00000164933, ENSG00000197375, ENSG00000076351	665	20	13528	4.06857	1	0.87778	73.831
GOTERM_BP_FAT	GO:0009743~response to carbohydrate stimulus	7	0.802752	0.0729932	ENSG00000114739, ENSG00000164756, ENSG00000004139, ENSG00000084674, ENSG00000181092, ENSG00000170893, ENSG00000169031	665	60	13528	2.37333	1	0.878551	74.2776
GOTERM_BP_FAT	GO:0048469~cell maturation	8	0.917431	0.0745183	ENSG00000124813, ENSG00000106852, ENSG00000100146, ENSG00000006607, ENSG00000139618, ENSG00000090316, ENSG00000118689, ENSG00000100151	665	75	13528	2.1699	1	0.88156	75.0253
GOTERM_BP_FAT	GO:0014033~neural crest cell differentiation	5	0.573394	0.0763918	ENSG00000151617, ENSG00000095596, ENSG00000187553, ENSG00000164690, ENSG00000162344	665	33	13528	3.08225	1	0.885631	75.9157
GOTERM_BP_FAT	GO:0014032~neural crest cell development	5	0.573394	0.0763918	ENSG00000151617, ENSG00000095596, ENSG00000187553, ENSG00000164690, ENSG00000162344	665	33	13528	3.08225	1	0.885631	75.9157
GOTERM_BP_FAT	GO:0034284~response to monosaccharide stimulus	6	0.688073	0.0791672	ENSG00000114739, ENSG00000164756, ENSG00000004139, ENSG00000181092, ENSG00000170893, ENSG00000169031	665	47	13528	2.59696	1	0.892386	77.1798
GOTERM_BP_FAT	GO:0009746~response to hexose stimulus	6	0.688073	0.0791672	ENSG00000114739, ENSG00000164756, ENSG00000004139, ENSG00000181092, ENSG00000170893, ENSG00000169031	665	47	13528	2.59696	1	0.892386	77.1798
GOTERM_BP_FAT	GO:0051302~regulation of cell division	6	0.688073	0.0791672	ENSG00000105894, ENSG00000075388, ENSG00000145431, ENSG00000186895, ENSG00000150630, ENSG00000121691	665	47	13528	2.59696	1	0.892386	77.1798
GOTERM_BP_FAT	GO:0032990~cell part morphogenesis	19	2.1789	0.0798285	ENSG00000171587, ENSG00000149557, ENSG00000021645, ENSG00000136535, ENSG00000145147, ENSG00000162631, ENSG00000146648, ENSG00000131437, ENSG00000127603, ENSG00000182580, ENSG00000099250, ENSG00000171791, ENSG00000121966, ENSG00000163394, ENSG00000165300, ENSG00000148498, ENSG00000169398, ENSG00000164690, ENSG00000163697	665	256	13528	1.50982	1	0.892214	77.4716
GOTERM_BP_FAT	GO:0001702~gastrulation with mouth forming second	4	0.458716	0.0811745	ENSG00000166225, ENSG00000114739, ENSG00000165671, ENSG00000090539	665	21	13528	3.87483	1	0.894159	78.0547
GOTERM_BP_FAT	GO:0048546~digestive tract morphogenesis	4	0.458716	0.0811745	ENSG00000100146, ENSG00000171791, ENSG00000114739, ENSG00000164690	665	21	13528	3.87483	1	0.894159	78.0547
GOTERM_BP_FAT	GO:0055123~digestive system development	4	0.458716	0.0811745	ENSG00000100146, ENSG00000171791, ENSG00000114739, ENSG00000164690	665	21	13528	3.87483	1	0.894159	78.0547
GOTERM_BP_FAT	GO:0051347~positive regulation of transferase activity	18	2.06422	0.0824632	ENSG00000157017, ENSG00000169047, ENSG00000197442, ENSG00000146648, ENSG00000100151, ENSG00000157680, ENSG00000058866, ENSG00000145431, ENSG00000151617, ENSG00000181163, ENSG00000166225, ENSG00000114739, ENSG00000121966, ENSG00000148498, ENSG00000106804, ENSG00000051382, ENSG00000157193, ENSG00000005249	665	240	13528	1.52571	1	0.895869	78.5996
GOTERM_BP_FAT	GO:0045860~positive regulation of protein kinase activity	17	1.94954	0.0826669	ENSG00000157017, ENSG00000197442, ENSG00000146648, ENSG00000100151, ENSG00000157680, ENSG00000058866, ENSG00000145431, ENSG00000151617, ENSG00000181163, ENSG00000166225, ENSG00000114739, ENSG00000121966, ENSG00000106804, ENSG00000148498, ENSG00000051382, ENSG00000157193, ENSG00000005249	665	223	13528	1.5508	1	0.894318	78.6845
GOTERM_BP_FAT	GO:0007269~neurotransmitter secretion	5	0.573394	0.0833786	ENSG00000021645, ENSG00000111052, ENSG00000169760, ENSG00000079841, ENSG00000119396	665	34	13528	2.9916	1	0.894296	78.9789
GOTERM_BP_FAT	GO:0015698~inorganic anion transport	9	1.03211	0.0860547	ENSG00000164707, ENSG00000167995, ENSG00000127325, ENSG00000112782, ENSG00000109738, ENSG00000154122, ENSG00000112280, ENSG00000131620, ENSG00000144290	665	93	13528	1.96866	1	0.899925	80.0516
GOTERM_BP_FAT	GO:0016358~dendrite development	5	0.573394	0.0906668	ENSG00000157017, ENSG00000171587, ENSG00000099250, ENSG00000101977, ENSG00000185532	665	35	13528	2.90612	1	0.910161	81.78
GOTERM_BP_FAT	GO:0010828~positive regulation of glucose transport	4	0.458716	0.0907114	ENSG00000119729, ENSG00000169047, ENSG00000181092, ENSG00000162344	665	22	13528	3.6987	1	0.908355	81.796
GOTERM_BP_FAT	GO:0006476~protein amino acid deacetylation	4	0.458716	0.0907114	ENSG00000138738, ENSG00000196591, ENSG00000068024, ENSG00000142082	665	22	13528	3.6987	1	0.908355	81.796
GOTERM_BP_FAT	GO:0046326~positive regulation of glucose import	4	0.458716	0.0907114	ENSG00000119729, ENSG00000169047, ENSG00000181092, ENSG00000162344	665	22	13528	3.6987	1	0.908355	81.796
GOTERM_BP_FAT	GO:0048839~inner ear development	8	0.917431	0.0924523	ENSG00000105928, ENSG00000164930, ENSG00000139304, ENSG00000112782, ENSG00000074771, ENSG00000174343, ENSG00000078579, ENSG00000111276	665	79	13528	2.06004	1	0.910793	82.4104
GOTERM_BP_FAT	GO:0000904~cell morphogenesis involved in differentiation	18	2.06422	0.0925227	ENSG00000171587, ENSG00000149557, ENSG00000021645, ENSG00000136535, ENSG00000145147, ENSG00000162631, ENSG00000127603, ENSG00000182580, ENSG00000099250, ENSG00000171791, ENSG00000121966, ENSG00000112782, ENSG00000163394, ENSG00000165300, ENSG00000148498, ENSG00000169398, ENSG00000164690, ENSG00000163697	665	244	13528	1.5007	1	0.909089	82.4348
GOTERM_BP_FAT	GO:0001764~neuron migration	7	0.802752	0.093148	ENSG00000187957, ENSG00000121966, ENSG00000163394, ENSG00000164438, ENSG00000185532, ENSG00000169398, ENSG00000163697	665	64	13528	2.225	1	0.90876	82.6504
GOTERM_BP_FAT	GO:0051270~regulation of cell motion	15	1.72018	0.0932467	ENSG00000152894, ENSG00000169047, ENSG00000100852, ENSG00000107937, ENSG00000150630, ENSG00000146648, ENSG00000090539, ENSG00000099250, ENSG00000171791, ENSG00000121966, ENSG00000148498, ENSG00000164690, ENSG00000140416, ENSG00000111276, ENSG00000035403	665	193	13528	1.58105	1	0.907135	82.6841
GOTERM_BP_FAT	GO:0051464~positive regulation of cortisol secretion	2	0.229358	0.095761	ENSG00000147571, ENSG00000157017	665	2	13528	20.3429	1	0.911388	83.5244
GOTERM_BP_FAT	GO:0046292~formaldehyde metabolic process	2	0.229358	0.095761	ENSG00000115548, ENSG00000197894	665	2	13528	20.3429	1	0.911388	83.5244
GOTERM_BP_FAT	GO:0006540~glutamate decarboxylation to succinate	2	0.229358	0.095761	ENSG00000128683, ENSG00000136750	665	2	13528	20.3429	1	0.911388	83.5244
GOTERM_BP_FAT	GO:0042322~negative regulation of circadian sleep/wake cycle, REM sleep	2	0.229358	0.095761	ENSG00000147571, ENSG00000157017	665	2	13528	20.3429	1	0.911388	83.5244
GOTERM_BP_FAT	GO:0007205~activation of protein kinase C activity by G-protein coupled receptor protein signaling pathway	5	0.573394	0.0982484	ENSG00000157680, ENSG00000058866, ENSG00000151617, ENSG00000148498, ENSG00000100151	665	36	13528	2.8254	1	0.915336	84.3177
GOTERM_BP_FAT	GO:0048754~branching morphogenesis of a tube	7	0.802752	0.0986108	ENSG00000151617, ENSG00000099250, ENSG00000171791, ENSG00000121966, ENSG00000164690, ENSG00000111341, ENSG00000004399	665	65	13528	2.19077	1	0.914409	84.4302
GOTERM_BP_FAT	GO:0007423~sensory organ development	17	1.94954	0.0986238	ENSG00000171587, ENSG00000077092, ENSG00000074771, ENSG00000146648, ENSG00000105928, ENSG00000164930, ENSG00000139304, ENSG00000171791, ENSG00000166225, ENSG00000112782, ENSG00000172845, ENSG00000117298, ENSG00000164690, ENSG00000174343, ENSG00000078579, ENSG00000134138, ENSG00000111276	665	229	13528	1.51017	1	0.912696	84.4343
Pathway:
Category	Term	Count	%	PValue	Genes	List Total	Pop Hits	Pop Total	Fold Enrichment	Bonferroni	Benjamini	FDR
KEGG_PATHWAY	hsa05218:Melanoma	13	1.49083	0.000183471	ENSG00000102466, ENSG00000075388, ENSG00000186895, ENSG00000114279, ENSG00000135679, ENSG00000105851, ENSG00000146648, ENSG00000129682, ENSG00000156427, ENSG00000145431, ENSG00000051382, ENSG00000078579, ENSG00000162344	257	71	5085	3.62279	0.0294656	0.0294656	0.222015
KEGG_PATHWAY	hsa04810:Regulation of actin cytoskeleton	21	2.40826	0.00540718	ENSG00000102466, ENSG00000150093, ENSG00000075388, ENSG00000186895, ENSG00000114279, ENSG00000105851, ENSG00000146648, ENSG00000112290, ENSG00000129682, ENSG00000105855, ENSG00000156427, ENSG00000148180, ENSG00000145431, ENSG00000160867, ENSG00000144668, ENSG00000058272, ENSG00000169398, ENSG00000051382, ENSG00000078579, ENSG00000162344, ENSG00000035403	257	215	5085	1.93259	0.586774	0.357174	6.35656
KEGG_PATHWAY	hsa05200:Pathways in cancer	28	3.21101	0.00708494	ENSG00000102466, ENSG00000139618, ENSG00000150630, ENSG00000105851, ENSG00000146648, ENSG00000175305, ENSG00000156427, ENSG00000164930, ENSG00000171791, ENSG00000108094, ENSG00000164690, ENSG00000051382, ENSG00000078579, ENSG00000133101, ENSG00000075388, ENSG00000150093, ENSG00000186895, ENSG00000056558, ENSG00000114279, ENSG00000077092, ENSG00000135679, ENSG00000196591, ENSG00000129682, ENSG0000…	257	328	5085	1.68905	0.686186	0.320446	8.25219
KEGG_PATHWAY	hsa05222:Small cell lung cancer	11	1.26147	0.00899497	ENSG00000150093, ENSG00000171791, ENSG00000056558, ENSG00000077092, ENSG00000105851, ENSG00000120868, ENSG00000169398, ENSG00000109320, ENSG00000051382, ENSG00000111276, ENSG00000175305	257	84	5085	2.59102	0.770721	0.308024	10.3674
KEGG_PATHWAY	hsa05215:Prostate cancer	10	1.14679	0.0339517	ENSG00000146592, ENSG00000145431, ENSG00000171791, ENSG00000135679, ENSG00000105851, ENSG00000109320, ENSG00000146648, ENSG00000051382, ENSG00000111276, ENSG00000175305	257	89	5085	2.22315	0.996412	0.675689	34.1906
KEGG_PATHWAY	hsa04670:Leukocyte transendothelial migration	12	1.37615	0.0343533	ENSG00000007952, ENSG00000150093, ENSG00000121966, ENSG00000100852, ENSG00000074771, ENSG00000105851, ENSG00000179776, ENSG00000169398, ENSG00000051382, ENSG00000091428, ENSG00000035403, ENSG00000134873	257	118	5085	2.01213	0.996647	0.613132	34.5212
KEGG_PATHWAY	hsa04150:mTOR signaling pathway	7	0.802752	0.0449068	ENSG00000135932, ENSG00000151247, ENSG00000150630, ENSG00000072133, ENSG00000105851, ENSG00000175766, ENSG00000051382	257	52	5085	2.6635	0.999441	0.656955	42.682
KEGG_PATHWAY	hsa05014:Amyotrophic lateral sclerosis (ALS)	7	0.802752	0.0485969	ENSG00000138814, ENSG00000171791, ENSG00000120251, ENSG00000197442, ENSG00000120868, ENSG00000067182, ENSG00000121691	257	53	5085	2.61324	0.999703	0.637608	45.3077
KEGG_PATHWAY	hsa04210:Apoptosis	9	1.03211	0.0701148	ENSG00000138814, ENSG00000157036, ENSG00000171791, ENSG00000105851, ENSG00000120868, ENSG00000109320, ENSG00000051382, ENSG00000067182, ENSG00000005249	257	87	5085	2.04683	0.999993	0.731947	58.5448
KEGG_PATHWAY	hsa04722:Neurotrophin signaling pathway	11	1.26147	0.0935017	ENSG00000166225, ENSG00000171791, ENSG00000169047, ENSG00000197442, ENSG00000072133, ENSG00000105851, ENSG00000148660, ENSG00000118689, ENSG00000109320, ENSG00000051382, ENSG00000110851	257	124	5085	1.75521	1	0.798125	69.5506

## Sheet: JH_JF
BP:
Category	Term	Count	%	PValue	Genes	List Total	Pop Hits	Pop Total	Fold Enrichment	Bonferroni	Benjamini	FDR
GOTERM_BP_FAT	GO:0019935~cyclic-nucleotide-mediated signaling	21	1.65485	0.000527972	ENSG00000112038, ENSG00000182687, ENSG00000087494, ENSG00000155897, ENSG00000198873, ENSG00000082556, ENSG00000171509, ENSG00000180616, ENSG00000171517, ENSG00000109756, ENSG00000185231, ENSG00000188778, ENSG00000158195, ENSG00000142875, ENSG00000128266, ENSG00000165409, ENSG00000164128, ENSG00000179097, ENSG00000168412, ENSG00000112164, ENSG00000176136	928	130	13528	2.35484	0.821417	0.821417	0.955231
GOTERM_BP_FAT	GO:0007187~G-protein signaling, coupled to cyclic nucleotide second messenger	19	1.49724	0.000799856	ENSG00000112038, ENSG00000182687, ENSG00000087494, ENSG00000155897, ENSG00000198873, ENSG00000082556, ENSG00000171509, ENSG00000180616, ENSG00000171517, ENSG00000185231, ENSG00000188778, ENSG00000158195, ENSG00000142875, ENSG00000128266, ENSG00000165409, ENSG00000164128, ENSG00000179097, ENSG00000168412, ENSG00000176136	928	115	13528	2.40847	0.926478	0.728851	1.44377
GOTERM_BP_FAT	GO:0007242~intracellular signaling cascade	115	9.06225	0.000938893	ENSG00000182687, ENSG00000109458, ENSG00000188906, ENSG00000171517, ENSG00000148484, ENSG00000168615, ENSG00000076641, ENSG00000117862, ENSG00000168412, ENSG00000176136, ENSG00000166148, ENSG00000198915, ENSG00000164342, ENSG00000115290, ENSG00000069702, ENSG00000128266, ENSG00000115825, ENSG00000009950, ENSG00000165650, ENSG00000008853, ENSG00000165731, ENSG00000169213, ENSG00000140945, ENSG0000…	928	1256	13528	1.33473	0.953305	0.639899	1.69271
GOTERM_BP_FAT	GO:0040017~positive regulation of locomotion	17	1.33964	0.000964491	ENSG00000105879, ENSG00000140945, ENSG00000107562, ENSG00000100739, ENSG00000166949, ENSG00000115353, ENSG00000172349, ENSG00000185950, ENSG00000048052, ENSG00000171791, ENSG00000186654, ENSG00000140443, ENSG00000168615, ENSG00000151694, ENSG00000102755, ENSG00000091136, ENSG00000176170	928	98	13528	2.52876	0.957049	0.544756	1.73848
GOTERM_BP_FAT	GO:0030335~positive regulation of cell migration	16	1.26084	0.000982965	ENSG00000105879, ENSG00000140945, ENSG00000107562, ENSG00000100739, ENSG00000166949, ENSG00000115353, ENSG00000185950, ENSG00000048052, ENSG00000171791, ENSG00000186654, ENSG00000168615, ENSG00000140443, ENSG00000151694, ENSG00000102755, ENSG00000091136, ENSG00000176170	928	89	13528	2.62069	0.959563	0.473552	1.7715
GOTERM_BP_FAT	GO:0030183~B cell differentiation	11	0.866824	0.00130291	ENSG00000067082, ENSG00000071564, ENSG00000171791, ENSG00000165409, ENSG00000169508, ENSG00000076554, ENSG00000151694, ENSG00000119866, ENSG00000048052, ENSG00000111732, ENSG00000153879	928	48	13528	3.3407	0.985777	0.507771	2.34168
GOTERM_BP_FAT	GO:0051270~regulation of cell motion	26	2.04886	0.00155646	ENSG00000105879, ENSG00000140945, ENSG00000107562, ENSG00000166949, ENSG00000182168, ENSG00000185950, ENSG00000109458, ENSG00000140526, ENSG00000163217, ENSG00000171791, ENSG00000184916, ENSG00000168615, ENSG00000140443, ENSG00000151694, ENSG00000091136, ENSG00000176170, ENSG00000100739, ENSG00000115353, ENSG00000170927, ENSG00000048052, ENSG00000069702, ENSG00000075213, ENSG00000142208, ENSG0000…	928	193	13528	1.96382	0.993787	0.516098	2.79131
GOTERM_BP_FAT	GO:0019933~cAMP-mediated signaling	16	1.26084	0.00193796	ENSG00000112038, ENSG00000182687, ENSG00000087494, ENSG00000155897, ENSG00000198873, ENSG00000082556, ENSG00000171509, ENSG00000180616, ENSG00000109756, ENSG00000188778, ENSG00000158195, ENSG00000142875, ENSG00000128266, ENSG00000165409, ENSG00000164128, ENSG00000112164	928	95	13528	2.45517	0.998214	0.546596	3.46417
GOTERM_BP_FAT	GO:0007155~cell adhesion	69	5.43735	0.00208016	ENSG00000138795, ENSG00000105879, ENSG00000091128, ENSG00000138696, ENSG00000134115, ENSG00000106927, ENSG00000156642, ENSG00000144810, ENSG00000077522, ENSG00000142871, ENSG00000069188, ENSG00000168615, ENSG00000165376, ENSG00000151276, ENSG00000131669, ENSG00000091136, ENSG00000148600, ENSG00000138964, ENSG00000153721, ENSG00000110799, ENSG00000077943, ENSG00000128536, ENSG00000140511, ENSG0000…	928	700	13528	1.43693	0.998878	0.529862	3.71384
GOTERM_BP_FAT	GO:0075136~response to host	5	0.394011	0.00208838	ENSG00000166949, ENSG00000164342, ENSG00000185507, ENSG00000196664, ENSG00000164116	928	9	13528	8.09866	0.998908	0.494365	3.72824
GOTERM_BP_FAT	GO:0052173~response to defenses of other organism during symbiotic interaction	5	0.394011	0.00208838	ENSG00000166949, ENSG00000164342, ENSG00000185507, ENSG00000196664, ENSG00000164116	928	9	13528	8.09866	0.998908	0.494365	3.72824
GOTERM_BP_FAT	GO:0052200~response to host defenses	5	0.394011	0.00208838	ENSG00000166949, ENSG00000164342, ENSG00000185507, ENSG00000196664, ENSG00000164116	928	9	13528	8.09866	0.998908	0.494365	3.72824
GOTERM_BP_FAT	GO:0022610~biological adhesion	69	5.43735	0.00214246	ENSG00000138795, ENSG00000105879, ENSG00000091128, ENSG00000138696, ENSG00000134115, ENSG00000106927, ENSG00000156642, ENSG00000144810, ENSG00000077522, ENSG00000142871, ENSG00000069188, ENSG00000168615, ENSG00000165376, ENSG00000151276, ENSG00000131669, ENSG00000091136, ENSG00000148600, ENSG00000138964, ENSG00000153721, ENSG00000110799, ENSG00000077943, ENSG00000128536, ENSG00000140511, ENSG0000…	928	701	13528	1.43488	0.999085	0.470605	3.82303
GOTERM_BP_FAT	GO:0044057~regulation of system process	36	2.83688	0.00230203	ENSG00000104368, ENSG00000147465, ENSG00000183023, ENSG00000180616, ENSG00000163217, ENSG00000156642, ENSG00000204217, ENSG00000136854, ENSG00000151090, ENSG00000169862, ENSG00000183454, ENSG00000164129, ENSG00000164128, ENSG00000112164, ENSG00000174775, ENSG00000176170, ENSG00000166148, ENSG00000168398, ENSG00000120251, ENSG00000179295, ENSG00000151067, ENSG00000115353, ENSG00000133703, ENSG0000…	928	309	13528	1.69836	0.999457	0.465535	4.10216
GOTERM_BP_FAT	GO:0051146~striated muscle cell differentiation	15	1.18203	0.00251535	ENSG00000166148, ENSG00000163217, ENSG00000138814, ENSG00000187957, ENSG00000107404, ENSG00000077092, ENSG00000133703, ENSG00000067141, ENSG00000070748, ENSG00000078618, ENSG00000148848, ENSG00000133392, ENSG00000174775, ENSG00000143632, ENSG00000141385	928	88	13528	2.48482	0.99973	0.468448	4.47413
GOTERM_BP_FAT	GO:0051272~positive regulation of cell motion	16	1.26084	0.00264968	ENSG00000105879, ENSG00000140945, ENSG00000107562, ENSG00000100739, ENSG00000166949, ENSG00000115353, ENSG00000185950, ENSG00000048052, ENSG00000171791, ENSG00000186654, ENSG00000168615, ENSG00000140443, ENSG00000151694, ENSG00000102755, ENSG00000091136, ENSG00000176170	928	98	13528	2.38001	0.999826	0.461083	4.70766
GOTERM_BP_FAT	GO:0030334~regulation of cell migration	23	1.81245	0.00271765	ENSG00000105879, ENSG00000140945, ENSG00000107562, ENSG00000100739, ENSG00000166949, ENSG00000115353, ENSG00000182168, ENSG00000185950, ENSG00000109458, ENSG00000048052, ENSG00000140526, ENSG00000163217, ENSG00000069702, ENSG00000171791, ENSG00000142208, ENSG00000186654, ENSG00000184916, ENSG00000140443, ENSG00000168615, ENSG00000151694, ENSG00000102755, ENSG00000091136, ENSG00000176170	928	169	13528	1.98393	0.99986	0.446671	4.82563
GOTERM_BP_FAT	GO:0019932~second-messenger-mediated signaling	29	2.28526	0.00295941	ENSG00000182687, ENSG00000155897, ENSG00000105851, ENSG00000198873, ENSG00000180616, ENSG00000171517, ENSG00000185231, ENSG00000142875, ENSG00000132646, ENSG00000140443, ENSG00000164128, ENSG00000168412, ENSG00000112164, ENSG00000176136, ENSG00000176170, ENSG00000166148, ENSG00000112038, ENSG00000087494, ENSG00000115353, ENSG00000082556, ENSG00000171509, ENSG00000109756, ENSG00000139144, ENSG0000…	928	235	13528	1.79894	0.999937	0.453513	5.24409
GOTERM_BP_FAT	GO:0040012~regulation of locomotion	25	1.97006	0.00307396	ENSG00000105879, ENSG00000140945, ENSG00000107562, ENSG00000166949, ENSG00000182168, ENSG00000185950, ENSG00000109458, ENSG00000140526, ENSG00000163217, ENSG00000171791, ENSG00000184916, ENSG00000168615, ENSG00000140443, ENSG00000151694, ENSG00000176170, ENSG00000091136, ENSG00000100739, ENSG00000115353, ENSG00000172349, ENSG00000048052, ENSG00000069702, ENSG00000142208, ENSG00000186654, ENSG0000…	928	192	13528	1.89812	0.999956	0.446086	5.44174
GOTERM_BP_FAT	GO:0007249~I-kappaB kinase/NF-kappaB cascade	12	0.945626	0.00338368	ENSG00000185104, ENSG00000197885, ENSG00000104365, ENSG00000181634, ENSG00000164342, ENSG00000146243, ENSG00000198001, ENSG00000142867, ENSG00000186197, ENSG00000196664, ENSG00000123131, ENSG00000127191	928	63	13528	2.77668	0.999984	0.458947	5.97423
GOTERM_BP_FAT	GO:0042692~muscle cell differentiation	18	1.41844	0.00360825	ENSG00000166148, ENSG00000187957, ENSG00000077092, ENSG00000111241, ENSG00000133703, ENSG00000067141, ENSG00000078618, ENSG00000185652, ENSG00000163217, ENSG00000136717, ENSG00000138814, ENSG00000107404, ENSG00000070748, ENSG00000148848, ENSG00000133392, ENSG00000174775, ENSG00000141385, ENSG00000143632	928	121	13528	2.16857	0.999992	0.462378	6.35856
GOTERM_BP_FAT	GO:0043062~extracellular structure organization	22	1.73365	0.00379488	ENSG00000179403, ENSG00000151150, ENSG00000187957, ENSG00000077943, ENSG00000122884, ENSG00000157766, ENSG00000182985, ENSG00000078618, ENSG00000171509, ENSG00000188064, ENSG00000173157, ENSG00000147408, ENSG00000143196, ENSG00000107404, ENSG00000131981, ENSG00000070748, ENSG00000142871, ENSG00000164692, ENSG00000077150, ENSG00000133392, ENSG00000152192, ENSG00000141385	928	163	13528	1.96753	0.999996	0.462121	6.67683
GOTERM_BP_FAT	GO:0043067~regulation of programmed cell death	76	5.98897	0.00460421	ENSG00000151923, ENSG00000026103, ENSG00000156735, ENSG00000153879, ENSG00000151929, ENSG00000188906, ENSG00000101152, ENSG00000163947, ENSG00000077522, ENSG00000183454, ENSG00000168615, ENSG00000131653, ENSG00000060138, ENSG00000117862, ENSG00000172379, ENSG00000152192, ENSG00000118503, ENSG00000176170, ENSG00000127863, ENSG00000168398, ENSG00000104332, ENSG00000169372, ENSG00000182985, ENSG0000…	928	812	13528	1.3644	1	0.511707	8.0452
GOTERM_BP_FAT	GO:0032147~activation of protein kinase activity	17	1.33964	0.00471603	ENSG00000100739, ENSG00000155897, ENSG00000164342, ENSG00000170927, ENSG00000151617, ENSG00000145431, ENSG00000181634, ENSG00000142875, ENSG00000115825, ENSG00000109270, ENSG00000168615, ENSG00000131653, ENSG00000005249, ENSG00000102755, ENSG00000100422, ENSG00000176170, ENSG00000127191	928	114	13528	2.17385	1	0.503868	8.23276
GOTERM_BP_FAT	GO:0016192~vesicle-mediated transport	57	4.49173	0.00487502	ENSG00000079950, ENSG00000119787, ENSG00000134569, ENSG00000109686, ENSG00000107862, ENSG00000109738, ENSG00000157077, ENSG00000171365, ENSG00000070718, ENSG00000103365, ENSG00000106105, ENSG00000087502, ENSG00000118308, ENSG00000120251, ENSG00000151067, ENSG00000168818, ENSG00000075790, ENSG00000019505, ENSG00000119541, ENSG00000188778, ENSG00000086065, ENSG00000158195, ENSG00000092929, ENSG0000…	928	576	13528	1.44257	1	0.499974	8.49882
GOTERM_BP_FAT	GO:0007188~G-protein signaling, coupled to cAMP nucleotide second messenger	14	1.10323	0.00499478	ENSG00000112038, ENSG00000182687, ENSG00000087494, ENSG00000155897, ENSG00000198873, ENSG00000171509, ENSG00000180616, ENSG00000082556, ENSG00000188778, ENSG00000158195, ENSG00000142875, ENSG00000128266, ENSG00000165409, ENSG00000164128	928	85	13528	2.40101	1	0.493675	8.69876
GOTERM_BP_FAT	GO:0010941~regulation of cell death	76	5.98897	0.00502727	ENSG00000151923, ENSG00000026103, ENSG00000156735, ENSG00000153879, ENSG00000151929, ENSG00000188906, ENSG00000101152, ENSG00000163947, ENSG00000077522, ENSG00000183454, ENSG00000168615, ENSG00000131653, ENSG00000060138, ENSG00000117862, ENSG00000172379, ENSG00000152192, ENSG00000118503, ENSG00000176170, ENSG00000127863, ENSG00000168398, ENSG00000104332, ENSG00000169372, ENSG00000182985, ENSG0000…	928	815	13528	1.35938	1	0.481913	8.75292
GOTERM_BP_FAT	GO:0050804~regulation of synaptic transmission	19	1.49724	0.00532016	ENSG00000104368, ENSG00000147465, ENSG00000120251, ENSG00000115353, ENSG00000133703, ENSG00000106089, ENSG00000185652, ENSG00000164418, ENSG00000138814, ENSG00000156642, ENSG00000134259, ENSG00000136854, ENSG00000169862, ENSG00000128245, ENSG00000070748, ENSG00000183454, ENSG00000198822, ENSG00000164129, ENSG00000174775	928	136	13528	2.03657	1	0.487911	9.23987
GOTERM_BP_FAT	GO:0051969~regulation of transmission of nerve impulse	20	1.57604	0.00552733	ENSG00000104368, ENSG00000166148, ENSG00000147465, ENSG00000120251, ENSG00000115353, ENSG00000133703, ENSG00000106089, ENSG00000185652, ENSG00000164418, ENSG00000138814, ENSG00000156642, ENSG00000134259, ENSG00000136854, ENSG00000169862, ENSG00000128245, ENSG00000070748, ENSG00000198822, ENSG00000183454, ENSG00000164129, ENSG00000174775	928	147	13528	1.98335	1	0.488105	9.58281
GOTERM_BP_FAT	GO:0046700~heterocycle catabolic process	13	1.02443	0.00588426	ENSG00000147647, ENSG00000079931, ENSG00000151790, ENSG00000138185, ENSG00000138735, ENSG00000163161, ENSG00000119711, ENSG00000119541, ENSG00000106927, ENSG00000091262, ENSG00000023697, ENSG00000131979, ENSG00000197217	928	77	13528	2.46115	1	0.497189	10.1708
GOTERM_BP_FAT	GO:0007167~enzyme linked receptor protein signaling pathway	37	2.91568	0.00667588	ENSG00000104368, ENSG00000165731, ENSG00000118972, ENSG00000138696, ENSG00000166949, ENSG00000115306, ENSG00000077782, ENSG00000157077, ENSG00000107779, ENSG00000185950, ENSG00000109458, ENSG00000170365, ENSG00000187840, ENSG00000163217, ENSG00000145431, ENSG00000177606, ENSG00000146247, ENSG00000204217, ENSG00000118523, ENSG00000140443, ENSG00000168615, ENSG00000164692, ENSG00000151694, ENSG0000…	928	342	13528	1.57711	1	0.529255	11.462
GOTERM_BP_FAT	GO:0030030~cell projection organization	39	3.07329	0.00735837	ENSG00000182687, ENSG00000151150, ENSG00000138696, ENSG00000140945, ENSG00000171595, ENSG00000107562, ENSG00000077782, ENSG00000182168, ENSG00000171517, ENSG00000171791, ENSG00000159674, ENSG00000144451, ENSG00000136854, ENSG00000077522, ENSG00000140443, ENSG00000129654, ENSG00000152192, ENSG00000091136, ENSG00000179295, ENSG00000077943, ENSG00000185532, ENSG00000185008, ENSG00000170927, ENSG0000…	928	368	13528	1.54491	1	0.552043	12.5611
GOTERM_BP_FAT	GO:0001502~cartilage condensation	6	0.472813	0.00774213	ENSG00000138696, ENSG00000111241, ENSG00000118523, ENSG00000157766, ENSG00000008710, ENSG00000125398	928	19	13528	4.60345	1	0.558617	13.1735
GOTERM_BP_FAT	GO:0042981~regulation of apoptosis	74	5.83136	0.00776717	ENSG00000151923, ENSG00000026103, ENSG00000156735, ENSG00000153879, ENSG00000151929, ENSG00000101152, ENSG00000163947, ENSG00000077522, ENSG00000183454, ENSG00000168615, ENSG00000131653, ENSG00000060138, ENSG00000117862, ENSG00000172379, ENSG00000152192, ENSG00000118503, ENSG00000176170, ENSG00000127863, ENSG00000168398, ENSG00000104332, ENSG00000169372, ENSG00000182985, ENSG00000134398, ENSG0000…	928	804	13528	1.34172	1	0.548354	13.2133
GOTERM_BP_FAT	GO:0040014~regulation of multicellular organism growth	11	0.866824	0.00803502	ENSG00000088812, ENSG00000158669, ENSG00000171791, ENSG00000188778, ENSG00000179295, ENSG00000142208, ENSG00000204842, ENSG00000165409, ENSG00000164128, ENSG00000107854, ENSG00000141385	928	61	13528	2.62875	1	0.549527	13.6381
GOTERM_BP_FAT	GO:0008217~regulation of blood pressure	15	1.18203	0.00808853	ENSG00000166148, ENSG00000186951, ENSG00000168398, ENSG00000051523, ENSG00000188778, ENSG00000151067, ENSG00000100739, ENSG00000204217, ENSG00000115353, ENSG00000169836, ENSG00000164692, ENSG00000164128, ENSG00000131979, ENSG00000164116, ENSG00000197894	928	100	13528	2.18664	1	0.541217	13.7227
GOTERM_BP_FAT	GO:0007243~protein kinase cascade	39	3.07329	0.0081416	ENSG00000165731, ENSG00000180210, ENSG00000104365, ENSG00000077782, ENSG00000109458, ENSG00000198001, ENSG00000170365, ENSG00000008710, ENSG00000196664, ENSG00000123131, ENSG00000171517, ENSG00000188906, ENSG00000181634, ENSG00000119185, ENSG00000143674, ENSG00000142875, ENSG00000146243, ENSG00000165238, ENSG00000109270, ENSG00000140443, ENSG00000168615, ENSG00000131653, ENSG00000127191, ENSG0000…	928	370	13528	1.53656	1	0.533223	13.8066
GOTERM_BP_FAT	GO:0031644~regulation of neurological system process	20	1.57604	0.00845273	ENSG00000104368, ENSG00000166148, ENSG00000147465, ENSG00000120251, ENSG00000115353, ENSG00000133703, ENSG00000106089, ENSG00000185652, ENSG00000164418, ENSG00000138814, ENSG00000156642, ENSG00000134259, ENSG00000136854, ENSG00000169862, ENSG00000128245, ENSG00000070748, ENSG00000198822, ENSG00000183454, ENSG00000164129, ENSG00000174775	928	153	13528	1.90557	1	0.536601	14.2966
GOTERM_BP_FAT	GO:0048747~muscle fiber development	8	0.630418	0.0085862	ENSG00000138814, ENSG00000187957, ENSG00000107404, ENSG00000070748, ENSG00000078618, ENSG00000133392, ENSG00000143632, ENSG00000141385	928	35	13528	3.33202	1	0.532449	14.5061
GOTERM_BP_FAT	GO:0031175~neuron projection development	29	2.28526	0.00952536	ENSG00000182687, ENSG00000151150, ENSG00000138696, ENSG00000107562, ENSG00000077782, ENSG00000182168, ENSG00000171791, ENSG00000159674, ENSG00000136854, ENSG00000140443, ENSG00000152192, ENSG00000091136, ENSG00000179295, ENSG00000185532, ENSG00000185008, ENSG00000170927, ENSG00000185652, ENSG00000116957, ENSG00000151615, ENSG00000075213, ENSG00000107404, ENSG00000134259, ENSG00000165300, ENSG0000…	928	256	13528	1.65137	1	0.560271	15.9661
GOTERM_BP_FAT	GO:0051607~defense response to virus	6	0.472813	0.00975111	ENSG00000069431, ENSG00000171791, ENSG00000092929, ENSG00000121361, ENSG00000143669, ENSG00000196664	928	20	13528	4.37328	1	0.55939	16.3135
GOTERM_BP_FAT	GO:0031331~positive regulation of cellular catabolic process	8	0.630418	0.0100438	ENSG00000186951, ENSG00000142208, ENSG00000109686, ENSG00000177666, ENSG00000185950, ENSG00000168615, ENSG00000009950, ENSG00000078618	928	36	13528	3.23946	1	0.56098	16.7619
GOTERM_BP_FAT	GO:0006351~transcription, DNA-dependent	32	2.52167	0.0101312	ENSG00000185024, ENSG00000182521, ENSG00000153147, ENSG00000163161, ENSG00000110768, ENSG00000122882, ENSG00000115750, ENSG00000172059, ENSG00000129691, ENSG00000131196, ENSG00000070047, ENSG00000115816, ENSG00000204217, ENSG00000151090, ENSG00000088930, ENSG00000116044, ENSG00000177700, ENSG00000104221, ENSG00000116830, ENSG00000165417, ENSG00000213079, ENSG00000134532, ENSG00000188342, ENSG0000…	928	292	13528	1.59754	1	0.555211	16.8953
GOTERM_BP_FAT	GO:0048741~skeletal muscle fiber development	7	0.551615	0.0104256	ENSG00000138814, ENSG00000187957, ENSG00000107404, ENSG00000070748, ENSG00000078618, ENSG00000143632, ENSG00000141385	928	28	13528	3.6444	1	0.556906	17.3435
GOTERM_BP_FAT	GO:0008104~protein localization	79	6.22537	0.0108592	ENSG00000079950, ENSG00000115306, ENSG00000135338, ENSG00000103227, ENSG00000157077, ENSG00000125844, ENSG00000178974, ENSG00000070718, ENSG00000103365, ENSG00000118507, ENSG00000183454, ENSG00000074319, ENSG00000138823, ENSG00000164144, ENSG00000139370, ENSG00000120251, ENSG00000075790, ENSG00000168818, ENSG00000213064, ENSG00000085832, ENSG00000119541, ENSG00000164418, ENSG00000138814, ENSG0000…	928	882	13528	1.3057	1	0.563204	17.9992
GOTERM_BP_FAT	GO:0010604~positive regulation of macromolecule metabolic process	77	6.06777	0.0113184	ENSG00000169946, ENSG00000138795, ENSG00000185024, ENSG00000109686, ENSG00000110768, ENSG00000107779, ENSG00000083635, ENSG00000175756, ENSG00000153879, ENSG00000196664, ENSG00000188906, ENSG00000124788, ENSG00000204217, ENSG00000168615, ENSG00000172379, ENSG00000198791, ENSG00000135373, ENSG00000116044, ENSG00000164342, ENSG00000197905, ENSG00000112742, ENSG00000125398, ENSG00000185652, ENSG0000…	928	857	13528	1.30977	1	0.569965	18.6883
GOTERM_BP_FAT	GO:0032774~RNA biosynthetic process	32	2.52167	0.0119195	ENSG00000185024, ENSG00000182521, ENSG00000153147, ENSG00000163161, ENSG00000110768, ENSG00000122882, ENSG00000115750, ENSG00000172059, ENSG00000129691, ENSG00000131196, ENSG00000070047, ENSG00000115816, ENSG00000204217, ENSG00000151090, ENSG00000088930, ENSG00000116044, ENSG00000177700, ENSG00000104221, ENSG00000116830, ENSG00000165417, ENSG00000213079, ENSG00000134532, ENSG00000188342, ENSG0000…	928	296	13528	1.57596	1	0.580721	19.5821
GOTERM_BP_FAT	GO:0045184~establishment of protein localization	70	5.51615	0.0122674	ENSG00000079950, ENSG00000115306, ENSG00000135338, ENSG00000157077, ENSG00000103227, ENSG00000125844, ENSG00000178974, ENSG00000070718, ENSG00000103365, ENSG00000074319, ENSG00000138823, ENSG00000164144, ENSG00000139370, ENSG00000120251, ENSG00000168818, ENSG00000075790, ENSG00000213064, ENSG00000085832, ENSG00000119541, ENSG00000164418, ENSG00000138814, ENSG00000142208, ENSG00000100300, ENSG0000…	928	769	13528	1.32696	1	0.583262	20.0952
GOTERM_BP_FAT	GO:0010629~negative regulation of gene expression	49	3.86131	0.0125458	ENSG00000198081, ENSG00000142655, ENSG00000169946, ENSG00000138795, ENSG00000182521, ENSG00000083168, ENSG00000166949, ENSG00000172059, ENSG00000170365, ENSG00000134744, ENSG00000159692, ENSG00000124788, ENSG00000151090, ENSG00000159263, ENSG00000074319, ENSG00000060138, ENSG00000074266, ENSG00000129654, ENSG00000124571, ENSG00000122691, ENSG00000142784, ENSG00000112033, ENSG00000077092, ENSG0000…	928	504	13528	1.41727	1	0.583655	20.5036
GOTERM_BP_FAT	GO:0000082~G1/S transition of mitotic cell cycle	10	0.788022	0.0131986	ENSG00000131196, ENSG00000138814, ENSG00000118971, ENSG00000171791, ENSG00000142208, ENSG00000060982, ENSG00000151694, ENSG00000111276, ENSG00000123080, ENSG00000183484	928	56	13528	2.60314	1	0.594617	21.4532
GOTERM_BP_FAT	GO:0009894~regulation of catabolic process	14	1.10323	0.0136868	ENSG00000119401, ENSG00000109686, ENSG00000185950, ENSG00000119938, ENSG00000122882, ENSG00000078618, ENSG00000176194, ENSG00000185104, ENSG00000186951, ENSG00000142208, ENSG00000177666, ENSG00000183454, ENSG00000168615, ENSG00000009950	928	96	13528	2.1259	1	0.60046	22.1565
GOTERM_BP_FAT	GO:0001822~kidney development	14	1.10323	0.0136868	ENSG00000165731, ENSG00000138795, ENSG00000100373, ENSG00000077092, ENSG00000077943, ENSG00000121361, ENSG00000170927, ENSG00000185008, ENSG00000170365, ENSG00000171791, ENSG00000104267, ENSG00000075891, ENSG00000170577, ENSG00000164056	928	96	13528	2.1259	1	0.60046	22.1565
GOTERM_BP_FAT	GO:0043069~negative regulation of programmed cell death	37	2.91568	0.0137936	ENSG00000104365, ENSG00000140945, ENSG00000166949, ENSG00000105851, ENSG00000026103, ENSG00000156735, ENSG00000151929, ENSG00000101152, ENSG00000176194, ENSG00000170312, ENSG00000089685, ENSG00000173157, ENSG00000171791, ENSG00000140443, ENSG00000151694, ENSG00000060138, ENSG00000172379, ENSG00000118503, ENSG00000174775, ENSG00000176170, ENSG00000168398, ENSG00000160049, ENSG00000104332, ENSG0000…	928	359	13528	1.50243	1	0.595927	22.3096
GOTERM_BP_FAT	GO:0042113~B cell activation	12	0.945626	0.0140454	ENSG00000067082, ENSG00000071564, ENSG00000171791, ENSG00000165409, ENSG00000169508, ENSG00000076554, ENSG00000151694, ENSG00000119866, ENSG00000048052, ENSG00000111732, ENSG00000153064, ENSG00000153879	928	76	13528	2.30172	1	0.595346	22.6693
GOTERM_BP_FAT	GO:0060548~negative regulation of cell death	37	2.91568	0.0143502	ENSG00000104365, ENSG00000140945, ENSG00000166949, ENSG00000105851, ENSG00000026103, ENSG00000156735, ENSG00000151929, ENSG00000101152, ENSG00000176194, ENSG00000170312, ENSG00000089685, ENSG00000173157, ENSG00000171791, ENSG00000140443, ENSG00000151694, ENSG00000060138, ENSG00000172379, ENSG00000118503, ENSG00000174775, ENSG00000176170, ENSG00000168398, ENSG00000160049, ENSG00000104332, ENSG0000…	928	360	13528	1.49825	1	0.596153	23.1026
GOTERM_BP_FAT	GO:0044265~cellular macromolecule catabolic process	66	5.20095	0.0150792	ENSG00000105879, ENSG00000145416, ENSG00000110768, ENSG00000103264, ENSG00000178974, ENSG00000167671, ENSG00000074319, ENSG00000168615, ENSG00000131653, ENSG00000117862, ENSG00000164109, ENSG00000088930, ENSG00000141543, ENSG00000159069, ENSG00000118503, ENSG00000147475, ENSG00000145390, ENSG00000107872, ENSG00000123124, ENSG00000134758, ENSG00000174010, ENSG00000078304, ENSG00000134398, ENSG0000…	928	725	13528	1.32706	1	0.607472	24.1297
GOTERM_BP_FAT	GO:0044270~nitrogen compound catabolic process	11	0.866824	0.0152887	ENSG00000147647, ENSG00000091262, ENSG00000138185, ENSG00000138735, ENSG00000163161, ENSG00000023697, ENSG00000119711, ENSG00000119541, ENSG00000106927, ENSG00000131979, ENSG00000197217	928	67	13528	2.39334	1	0.605715	24.4225
GOTERM_BP_FAT	GO:0032582~negative regulation of gene-specific transcription	9	0.70922	0.01539	ENSG00000186951, ENSG00000142655, ENSG00000142784, ENSG00000166949, ENSG00000109320, ENSG00000111276, ENSG00000048052, ENSG00000129654, ENSG00000177565	928	48	13528	2.7333	1	0.601428	24.5638
GOTERM_BP_FAT	GO:0035295~tube development	25	1.97006	0.0160212	ENSG00000165731, ENSG00000169946, ENSG00000107562, ENSG00000149196, ENSG00000107779, ENSG00000171791, ENSG00000204217, ENSG00000118523, ENSG00000159263, ENSG00000142871, ENSG00000137203, ENSG00000164161, ENSG00000122691, ENSG00000077092, ENSG00000087494, ENSG00000185008, ENSG00000143013, ENSG00000151617, ENSG00000075891, ENSG00000125850, ENSG00000102755, ENSG00000164056, ENSG00000142867, ENSG0000…	928	220	13528	1.65654	1	0.609682	25.4379
GOTERM_BP_FAT	GO:0008015~blood circulation	22	1.73365	0.0163998	ENSG00000166148, ENSG00000168398, ENSG00000151067, ENSG00000107562, ENSG00000100739, ENSG00000115353, ENSG00000138735, ENSG00000169836, ENSG00000121361, ENSG00000197894, ENSG00000186951, ENSG00000151617, ENSG00000188778, ENSG00000051523, ENSG00000061918, ENSG00000204217, ENSG00000138622, ENSG00000164692, ENSG00000164128, ENSG00000131979, ENSG00000164532, ENSG00000164116	928	186	13528	1.72423	1	0.611829	25.9575
GOTERM_BP_FAT	GO:0003013~circulatory system process	22	1.73365	0.0163998	ENSG00000166148, ENSG00000168398, ENSG00000151067, ENSG00000107562, ENSG00000100739, ENSG00000115353, ENSG00000138735, ENSG00000169836, ENSG00000121361, ENSG00000197894, ENSG00000186951, ENSG00000151617, ENSG00000188778, ENSG00000051523, ENSG00000061918, ENSG00000204217, ENSG00000138622, ENSG00000164692, ENSG00000164128, ENSG00000131979, ENSG00000164532, ENSG00000164116	928	186	13528	1.72423	1	0.611829	25.9575
GOTERM_BP_FAT	GO:0034655~nucleobase, nucleoside, nucleotide and nucleic acid catabolic process	10	0.788022	0.0164318	ENSG00000147647, ENSG00000091262, ENSG00000138185, ENSG00000138735, ENSG00000163161, ENSG00000023697, ENSG00000119711, ENSG00000119541, ENSG00000131979, ENSG00000197217	928	58	13528	2.51338	1	0.606166	26.0014
GOTERM_BP_FAT	GO:0034656~nucleobase, nucleoside and nucleotide catabolic process	10	0.788022	0.0164318	ENSG00000147647, ENSG00000091262, ENSG00000138185, ENSG00000138735, ENSG00000163161, ENSG00000023697, ENSG00000119711, ENSG00000119541, ENSG00000131979, ENSG00000197217	928	58	13528	2.51338	1	0.606166	26.0014
GOTERM_BP_FAT	GO:0009896~positive regulation of catabolic process	9	0.70922	0.0173229	ENSG00000186951, ENSG00000142208, ENSG00000119401, ENSG00000109686, ENSG00000177666, ENSG00000185950, ENSG00000168615, ENSG00000009950, ENSG00000078618	928	49	13528	2.67752	1	0.619452	27.2103
GOTERM_BP_FAT	GO:0040008~regulation of growth	35	2.75808	0.0176639	ENSG00000158669, ENSG00000168243, ENSG00000140945, ENSG00000166949, ENSG00000167967, ENSG00000147650, ENSG00000088812, ENSG00000163217, ENSG00000171791, ENSG00000204842, ENSG00000118523, ENSG00000074319, ENSG00000142871, ENSG00000151694, ENSG00000060138, ENSG00000164128, ENSG00000176170, ENSG00000166148, ENSG00000184613, ENSG00000179295, ENSG00000100739, ENSG00000151067, ENSG00000123080, ENSG0000…	928	341	13528	1.49623	1	0.620504	27.668
GOTERM_BP_FAT	GO:0045776~negative regulation of blood pressure	6	0.472813	0.0178508	ENSG00000186951, ENSG00000168398, ENSG00000188778, ENSG00000100739, ENSG00000204217, ENSG00000131979	928	23	13528	3.80285	1	0.618331	27.9178
GOTERM_BP_FAT	GO:0001655~urogenital system development	15	1.18203	0.0179345	ENSG00000165731, ENSG00000138795, ENSG00000100373, ENSG00000104332, ENSG00000077092, ENSG00000077943, ENSG00000121361, ENSG00000185008, ENSG00000170927, ENSG00000170365, ENSG00000171791, ENSG00000104267, ENSG00000075891, ENSG00000170577, ENSG00000164056	928	110	13528	1.98785	1	0.614089	28.0292
GOTERM_BP_FAT	GO:0043066~negative regulation of apoptosis	36	2.83688	0.0182533	ENSG00000104365, ENSG00000140945, ENSG00000166949, ENSG00000105851, ENSG00000026103, ENSG00000156735, ENSG00000151929, ENSG00000101152, ENSG00000176194, ENSG00000170312, ENSG00000089685, ENSG00000173157, ENSG00000171791, ENSG00000140443, ENSG00000151694, ENSG00000060138, ENSG00000172379, ENSG00000118503, ENSG00000174775, ENSG00000176170, ENSG00000168398, ENSG00000160049, ENSG00000104332, ENSG0000…	928	354	13528	1.48247	1	0.614745	28.4528
GOTERM_BP_FAT	GO:0045860~positive regulation of protein kinase activity	25	1.97006	0.0186084	ENSG00000118971, ENSG00000155897, ENSG00000109458, ENSG00000171517, ENSG00000145431, ENSG00000181634, ENSG00000142875, ENSG00000143674, ENSG00000109270, ENSG00000168615, ENSG00000131653, ENSG00000151694, ENSG00000005249, ENSG00000127191, ENSG00000176170, ENSG00000179295, ENSG00000100739, ENSG00000133703, ENSG00000164342, ENSG00000170927, ENSG00000151617, ENSG00000142208, ENSG00000115825, ENSG0000…	928	223	13528	1.63426	1	0.616103	28.9216
GOTERM_BP_FAT	GO:0007611~learning or memory	15	1.18203	0.0192765	ENSG00000182687, ENSG00000169306, ENSG00000151067, ENSG00000077943, ENSG00000115353, ENSG00000155897, ENSG00000133703, ENSG00000177606, ENSG00000134259, ENSG00000124788, ENSG00000169862, ENSG00000183454, ENSG00000005249, ENSG00000174775, ENSG00000112164	928	111	13528	1.96994	1	0.623497	29.7959
GOTERM_BP_FAT	GO:0032535~regulation of cellular component size	29	2.28526	0.0193739	ENSG00000168243, ENSG00000107562, ENSG00000166949, ENSG00000115306, ENSG00000077782, ENSG00000167965, ENSG00000115091, ENSG00000163217, ENSG00000171791, ENSG00000125868, ENSG00000151694, ENSG00000078579, ENSG00000088930, ENSG00000176170, ENSG00000166148, ENSG00000100739, ENSG00000142784, ENSG00000177938, ENSG00000123080, ENSG00000151615, ENSG00000069702, ENSG00000075213, ENSG00000142208, ENSG0000…	928	271	13528	1.55996	1	0.619754	29.9225
GOTERM_BP_FAT	GO:0070271~protein complex biogenesis	48	3.78251	0.0196268	ENSG00000119787, ENSG00000080824, ENSG00000142655, ENSG00000182521, ENSG00000185024, ENSG00000166949, ENSG00000176014, ENSG00000072080, ENSG00000153147, ENSG00000163161, ENSG00000109738, ENSG00000157077, ENSG00000026103, ENSG00000110768, ENSG00000170365, ENSG00000138758, ENSG00000145431, ENSG00000051523, ENSG00000159307, ENSG00000082516, ENSG00000167670, ENSG00000077522, ENSG00000140443, ENSG0000…	928	505	13528	1.38559	1	0.61904	30.2502
GOTERM_BP_FAT	GO:0006461~protein complex assembly	48	3.78251	0.0196268	ENSG00000119787, ENSG00000080824, ENSG00000142655, ENSG00000182521, ENSG00000185024, ENSG00000166949, ENSG00000176014, ENSG00000072080, ENSG00000153147, ENSG00000163161, ENSG00000109738, ENSG00000157077, ENSG00000026103, ENSG00000110768, ENSG00000170365, ENSG00000138758, ENSG00000145431, ENSG00000051523, ENSG00000159307, ENSG00000082516, ENSG00000167670, ENSG00000077522, ENSG00000140443, ENSG0000…	928	505	13528	1.38559	1	0.61904	30.2502
GOTERM_BP_FAT	GO:0045892~negative regulation of transcription, DNA-dependent	36	2.83688	0.0197234	ENSG00000198081, ENSG00000142655, ENSG00000169946, ENSG00000138795, ENSG00000182521, ENSG00000166949, ENSG00000172059, ENSG00000159692, ENSG00000159263, ENSG00000074319, ENSG00000060138, ENSG00000129654, ENSG00000122691, ENSG00000112033, ENSG00000142784, ENSG00000077092, ENSG00000177425, ENSG00000138083, ENSG00000125398, ENSG00000048052, ENSG00000177565, ENSG00000111249, ENSG00000151615, ENSG0000…	928	356	13528	1.47414	1	0.615418	30.3751
GOTERM_BP_FAT	GO:0009719~response to endogenous stimulus	40	3.15209	0.0199696	ENSG00000147465, ENSG00000168243, ENSG00000118971, ENSG00000140945, ENSG00000155897, ENSG00000185950, ENSG00000026103, ENSG00000109458, ENSG00000174021, ENSG00000170365, ENSG00000129673, ENSG00000187840, ENSG00000171791, ENSG00000146247, ENSG00000140545, ENSG00000142875, ENSG00000140443, ENSG00000168615, ENSG00000183454, ENSG00000151694, ENSG00000164128, ENSG00000005249, ENSG00000172379, ENSG0000…	928	405	13528	1.43976	1	0.614658	30.6922
GOTERM_BP_FAT	GO:0015031~protein transport	68	5.35855	0.0200975	ENSG00000079950, ENSG00000115306, ENSG00000135338, ENSG00000157077, ENSG00000103227, ENSG00000125844, ENSG00000178974, ENSG00000070718, ENSG00000103365, ENSG00000074319, ENSG00000138823, ENSG00000164144, ENSG00000139370, ENSG00000168818, ENSG00000075790, ENSG00000213064, ENSG00000085832, ENSG00000119541, ENSG00000164418, ENSG00000138814, ENSG00000142208, ENSG00000100300, ENSG00000086065, ENSG0000…	928	762	13528	1.30089	1	0.61174	30.8564
GOTERM_BP_FAT	GO:0000910~cytokinesis	8	0.630418	0.0201219	ENSG00000021574, ENSG00000089685, ENSG00000125868, ENSG00000153207, ENSG00000147202, ENSG00000122545, ENSG00000166851, ENSG00000122359	928	41	13528	2.84441	1	0.606982	30.8877
GOTERM_BP_FAT	GO:0012501~programmed cell death	56	4.41292	0.0219806	ENSG00000182168, ENSG00000151923, ENSG00000026103, ENSG00000165806, ENSG00000176907, ENSG00000156687, ENSG00000156735, ENSG00000177595, ENSG00000151929, ENSG00000148481, ENSG00000163947, ENSG00000131653, ENSG00000117862, ENSG00000118503, ENSG00000127863, ENSG00000075790, ENSG00000169372, ENSG00000182985, ENSG00000134398, ENSG00000164418, ENSG00000185104, ENSG00000142208, ENSG00000134259, ENSG0000…	928	611	13528	1.33608	1	0.634669	33.232
GOTERM_BP_FAT	GO:0031329~regulation of cellular catabolic process	10	0.788022	0.0223167	ENSG00000186951, ENSG00000142208, ENSG00000109686, ENSG00000177666, ENSG00000185950, ENSG00000168615, ENSG00000119938, ENSG00000122882, ENSG00000009950, ENSG00000078618	928	61	13528	2.38977	1	0.63524	33.6477
GOTERM_BP_FAT	GO:0006888~ER to Golgi vesicle-mediated transport	8	0.630418	0.0227647	ENSG00000021574, ENSG00000119787, ENSG00000087502, ENSG00000168818, ENSG00000101310, ENSG00000138674, ENSG00000124333, ENSG00000100934	928	42	13528	2.77668	1	0.637631	34.1981
GOTERM_BP_FAT	GO:0016481~negative regulation of transcription	44	3.4673	0.0227845	ENSG00000198081, ENSG00000142655, ENSG00000169946, ENSG00000138795, ENSG00000182521, ENSG00000083168, ENSG00000166949, ENSG00000172059, ENSG00000159692, ENSG00000124788, ENSG00000151090, ENSG00000074319, ENSG00000159263, ENSG00000060138, ENSG00000074266, ENSG00000129654, ENSG00000122691, ENSG00000142784, ENSG00000112033, ENSG00000077092, ENSG00000177425, ENSG00000123124, ENSG00000138083, ENSG0000…	928	459	13528	1.39742	1	0.633017	34.2224
GOTERM_BP_FAT	GO:0009057~macromolecule catabolic process	69	5.43735	0.0233264	ENSG00000105879, ENSG00000145416, ENSG00000110768, ENSG00000103264, ENSG00000178974, ENSG00000167671, ENSG00000074319, ENSG00000168615, ENSG00000131653, ENSG00000117862, ENSG00000164109, ENSG00000088930, ENSG00000141543, ENSG00000159069, ENSG00000118503, ENSG00000147475, ENSG00000145390, ENSG00000107872, ENSG00000123124, ENSG00000174010, ENSG00000134758, ENSG00000078304, ENSG00000134398, ENSG0000…	928	781	13528	1.2879	1	0.636892	34.8821
GOTERM_BP_FAT	GO:0046942~carboxylic acid transport	18	1.41844	0.0234234	ENSG00000168398, ENSG00000177542, ENSG00000134294, ENSG00000112033, ENSG00000164893, ENSG00000174827, ENSG00000144741, ENSG00000103257, ENSG00000186951, ENSG00000111371, ENSG00000089057, ENSG00000141526, ENSG00000139209, ENSG00000162383, ENSG00000119899, ENSG00000145384, ENSG00000139514, ENSG00000157184	928	147	13528	1.78501	1	0.633629	34.9996
GOTERM_BP_FAT	GO:0051329~interphase of mitotic cell cycle	14	1.10323	0.0234578	ENSG00000118971, ENSG00000060982, ENSG00000183484, ENSG00000123080, ENSG00000101868, ENSG00000131196, ENSG00000138814, ENSG00000089685, ENSG00000071564, ENSG00000171791, ENSG00000142208, ENSG00000151694, ENSG00000111276, ENSG00000164162	928	103	13528	1.98142	1	0.629427	35.0412
GOTERM_BP_FAT	GO:0055002~striated muscle cell development	9	0.70922	0.0241599	ENSG00000163217, ENSG00000138814, ENSG00000187957, ENSG00000107404, ENSG00000070748, ENSG00000078618, ENSG00000133392, ENSG00000143632, ENSG00000141385	928	52	13528	2.52304	1	0.635721	35.8847
GOTERM_BP_FAT	GO:0051253~negative regulation of RNA metabolic process	36	2.83688	0.0246209	ENSG00000198081, ENSG00000142655, ENSG00000169946, ENSG00000138795, ENSG00000182521, ENSG00000166949, ENSG00000172059, ENSG00000159692, ENSG00000159263, ENSG00000074319, ENSG00000060138, ENSG00000129654, ENSG00000122691, ENSG00000112033, ENSG00000142784, ENSG00000077092, ENSG00000177425, ENSG00000138083, ENSG00000125398, ENSG00000048052, ENSG00000177565, ENSG00000111249, ENSG00000151615, ENSG0000…	928	362	13528	1.4497	1	0.638135	36.4331
GOTERM_BP_FAT	GO:0015849~organic acid transport	18	1.41844	0.0248409	ENSG00000168398, ENSG00000177542, ENSG00000134294, ENSG00000112033, ENSG00000164893, ENSG00000174827, ENSG00000144741, ENSG00000103257, ENSG00000186951, ENSG00000111371, ENSG00000089057, ENSG00000141526, ENSG00000139209, ENSG00000162383, ENSG00000119899, ENSG00000145384, ENSG00000139514, ENSG00000157184	928	148	13528	1.77295	1	0.636879	36.6931
GOTERM_BP_FAT	GO:0006915~apoptosis	55	4.33412	0.0249442	ENSG00000182168, ENSG00000151923, ENSG00000026103, ENSG00000165806, ENSG00000176907, ENSG00000156687, ENSG00000156735, ENSG00000177595, ENSG00000151929, ENSG00000148481, ENSG00000163947, ENSG00000131653, ENSG00000117862, ENSG00000118503, ENSG00000127863, ENSG00000075790, ENSG00000169372, ENSG00000182985, ENSG00000134398, ENSG00000164418, ENSG00000185104, ENSG00000142208, ENSG00000134259, ENSG0000…	928	602	13528	1.33184	1	0.633911	36.8149
GOTERM_BP_FAT	GO:0009261~ribonucleotide catabolic process	6	0.472813	0.0251773	ENSG00000091262, ENSG00000138185, ENSG00000163161, ENSG00000119541, ENSG00000131979, ENSG00000197217	928	25	13528	3.49862	1	0.632917	37.0888
GOTERM_BP_FAT	GO:0008361~regulation of cell size	23	1.81245	0.0254148	ENSG00000166148, ENSG00000168243, ENSG00000100739, ENSG00000142784, ENSG00000166949, ENSG00000077782, ENSG00000123080, ENSG00000151615, ENSG00000163217, ENSG00000069702, ENSG00000075213, ENSG00000171791, ENSG00000142208, ENSG00000134259, ENSG00000198964, ENSG00000151694, ENSG00000147548, ENSG00000078579, ENSG00000137764, ENSG00000111276, ENSG00000088930, ENSG00000176170, ENSG00000143632	928	206	13528	1.62759	1	0.63201	37.3668
GOTERM_BP_FAT	GO:0032228~regulation of synaptic transmission, GABAergic	5	0.394011	0.0254186	ENSG00000115353, ENSG00000136854, ENSG00000133703, ENSG00000164129, ENSG00000174775	928	17	13528	4.28753	1	0.627712	37.3712
GOTERM_BP_FAT	GO:0002467~germinal center formation	3	0.236407	0.0256448	ENSG00000092929, ENSG00000151694, ENSG00000077150	928	4	13528	10.9332	1	0.626711	37.6349
GOTERM_BP_FAT	GO:0051094~positive regulation of developmental process	29	2.28526	0.0261003	ENSG00000147465, ENSG00000138696, ENSG00000166949, ENSG00000107779, ENSG00000170365, ENSG00000115091, ENSG00000188064, ENSG00000163217, ENSG00000173157, ENSG00000177606, ENSG00000171791, ENSG00000156642, ENSG00000204217, ENSG00000125820, ENSG00000151090, ENSG00000168615, ENSG00000153904, ENSG00000112305, ENSG00000176170, ENSG00000112033, ENSG00000185008, ENSG00000048052, ENSG00000185652, ENSG0000…	928	278	13528	1.52068	1	0.62902	38.1627
GOTERM_BP_FAT	GO:0010033~response to organic substance	64	5.04334	0.0264111	ENSG00000147465, ENSG00000168243, ENSG00000138795, ENSG00000183023, ENSG00000026103, ENSG00000109458, ENSG00000174021, ENSG00000129673, ENSG00000197894, ENSG00000146247, ENSG00000142875, ENSG00000183454, ENSG00000168615, ENSG00000142871, ENSG00000005249, ENSG00000172379, ENSG00000116044, ENSG00000166148, ENSG00000179295, ENSG00000142784, ENSG00000115353, ENSG00000164342, ENSG00000182670, ENSG0000…	928	721	13528	1.29399	1	0.629229	38.5203
GOTERM_BP_FAT	GO:0001909~leukocyte mediated cytotoxicity	4	0.315209	0.0267478	ENSG00000092929, ENSG00000182985, ENSG00000143669, ENSG00000153879	928	10	13528	5.83103	1	0.629796	38.9056
GOTERM_BP_FAT	GO:0033674~positive regulation of kinase activity	25	1.97006	0.0271234	ENSG00000118971, ENSG00000155897, ENSG00000109458, ENSG00000171517, ENSG00000145431, ENSG00000181634, ENSG00000142875, ENSG00000143674, ENSG00000109270, ENSG00000168615, ENSG00000131653, ENSG00000151694, ENSG00000005249, ENSG00000127191, ENSG00000176170, ENSG00000179295, ENSG00000100739, ENSG00000133703, ENSG00000164342, ENSG00000170927, ENSG00000151617, ENSG00000142208, ENSG00000115825, ENSG0000…	928	231	13528	1.57766	1	0.630886	39.3328
GOTERM_BP_FAT	GO:0009891~positive regulation of biosynthetic process	62	4.88574	0.0272609	ENSG00000169946, ENSG00000138795, ENSG00000185024, ENSG00000110768, ENSG00000083635, ENSG00000196664, ENSG00000153879, ENSG00000124788, ENSG00000172379, ENSG00000198791, ENSG00000135373, ENSG00000116044, ENSG00000166148, ENSG00000087494, ENSG00000164342, ENSG00000197905, ENSG00000125398, ENSG00000185652, ENSG00000187735, ENSG00000151615, ENSG00000067082, ENSG00000065970, ENSG00000142208, ENSG0000…	928	695	13528	1.30045	1	0.628707	39.4884
GOTERM_BP_FAT	GO:0010324~membrane invagination	24	1.89125	0.0282191	ENSG00000134569, ENSG00000187957, ENSG00000120251, ENSG00000089818, ENSG00000155849, ENSG00000133703, ENSG00000157077, ENSG00000147650, ENSG00000070018, ENSG00000140022, ENSG00000124333, ENSG00000171365, ENSG00000136717, ENSG00000140545, ENSG00000188778, ENSG00000158195, ENSG00000003056, ENSG00000092929, ENSG00000047249, ENSG00000141985, ENSG00000136854, ENSG00000112335, ENSG00000130147, ENSG0000…	928	220	13528	1.59028	1	0.637576	40.5626
GOTERM_BP_FAT	GO:0006897~endocytosis	24	1.89125	0.0282191	ENSG00000134569, ENSG00000187957, ENSG00000120251, ENSG00000089818, ENSG00000155849, ENSG00000133703, ENSG00000157077, ENSG00000147650, ENSG00000070018, ENSG00000140022, ENSG00000124333, ENSG00000171365, ENSG00000136717, ENSG00000140545, ENSG00000188778, ENSG00000158195, ENSG00000003056, ENSG00000092929, ENSG00000047249, ENSG00000141985, ENSG00000136854, ENSG00000112335, ENSG00000130147, ENSG0000…	928	220	13528	1.59028	1	0.637576	40.5626
GOTERM_BP_FAT	GO:0000904~cell morphogenesis involved in differentiation	26	2.04886	0.0284373	ENSG00000151150, ENSG00000138795, ENSG00000138696, ENSG00000107562, ENSG00000182168, ENSG00000131196, ENSG00000171791, ENSG00000159674, ENSG00000136854, ENSG00000140443, ENSG00000152192, ENSG00000091136, ENSG00000179295, ENSG00000185008, ENSG00000170927, ENSG00000125398, ENSG00000185652, ENSG00000116957, ENSG00000151615, ENSG00000069702, ENSG00000075213, ENSG00000107404, ENSG00000075891, ENSG0000…	928	244	13528	1.55335	1	0.636474	40.8047
GOTERM_BP_FAT	GO:0051260~protein homooligomerization	13	1.02443	0.0285971	ENSG00000147647, ENSG00000021574, ENSG00000146197, ENSG00000119787, ENSG00000142655, ENSG00000171867, ENSG00000159307, ENSG00000110799, ENSG00000026103, ENSG00000077522, ENSG00000144481, ENSG00000131979, ENSG00000142867	928	95	13528	1.99483	1	0.63463	40.9814
GOTERM_BP_FAT	GO:0031328~positive regulation of cellular biosynthetic process	61	4.80693	0.0286312	ENSG00000169946, ENSG00000138795, ENSG00000185024, ENSG00000083635, ENSG00000110768, ENSG00000196664, ENSG00000153879, ENSG00000124788, ENSG00000172379, ENSG00000198791, ENSG00000135373, ENSG00000116044, ENSG00000166148, ENSG00000087494, ENSG00000164342, ENSG00000197905, ENSG00000125398, ENSG00000185652, ENSG00000187735, ENSG00000151615, ENSG00000067082, ENSG00000065970, ENSG00000142208, ENSG0000…	928	685	13528	1.29815	1	0.631182	41.019
GOTERM_BP_FAT	GO:0001656~metanephros development	8	0.630418	0.0287487	ENSG00000165731, ENSG00000171791, ENSG00000077092, ENSG00000077943, ENSG00000075891, ENSG00000170577, ENSG00000185008, ENSG00000164056	928	44	13528	2.65047	1	0.628859	41.1486
GOTERM_BP_FAT	GO:0051325~interphase	14	1.10323	0.028943	ENSG00000118971, ENSG00000060982, ENSG00000183484, ENSG00000123080, ENSG00000101868, ENSG00000131196, ENSG00000138814, ENSG00000089685, ENSG00000071564, ENSG00000171791, ENSG00000142208, ENSG00000151694, ENSG00000111276, ENSG00000164162	928	106	13528	1.92534	1	0.627562	41.3622
GOTERM_BP_FAT	GO:0045761~regulation of adenylate cyclase activity	13	1.02443	0.0307271	ENSG00000112038, ENSG00000182687, ENSG00000087494, ENSG00000155897, ENSG00000180616, ENSG00000082556, ENSG00000151617, ENSG00000188778, ENSG00000165409, ENSG00000128266, ENSG00000198822, ENSG00000164128, ENSG00000112164	928	96	13528	1.97405	1	0.646127	43.2897
GOTERM_BP_FAT	GO:0016567~protein ubiquitination	15	1.18203	0.0328935	ENSG00000105879, ENSG00000009335, ENSG00000119401, ENSG00000109670, ENSG00000123124, ENSG00000123091, ENSG00000122257, ENSG00000137393, ENSG00000007944, ENSG00000142208, ENSG00000170142, ENSG00000197530, ENSG00000130939, ENSG00000074319, ENSG00000131653	928	119	13528	1.83751	1	0.66781	45.5496
GOTERM_BP_FAT	GO:0051098~regulation of binding	18	1.41844	0.0329159	ENSG00000142655, ENSG00000104365, ENSG00000166949, ENSG00000087494, ENSG00000164342, ENSG00000111218, ENSG00000133703, ENSG00000107223, ENSG00000153879, ENSG00000184990, ENSG00000069702, ENSG00000137504, ENSG00000171791, ENSG00000188778, ENSG00000121691, ENSG00000129654, ENSG00000142867, ENSG00000165672	928	153	13528	1.71501	1	0.664384	45.5726
GOTERM_BP_FAT	GO:0010648~negative regulation of cell communication	26	2.04886	0.0337177	ENSG00000070018, ENSG00000106927, ENSG00000176194, ENSG00000078246, ENSG00000124788, ENSG00000165233, ENSG00000164619, ENSG00000136854, ENSG00000089234, ENSG00000164129, ENSG00000155011, ENSG00000118503, ENSG00000164161, ENSG00000148908, ENSG00000091844, ENSG00000166148, ENSG00000177425, ENSG00000138083, ENSG00000115290, ENSG00000164418, ENSG00000147509, ENSG00000188778, ENSG00000142208, ENSG0000…	928	248	13528	1.5283	1	0.669703	46.3868
GOTERM_BP_FAT	GO:0007169~transmembrane receptor protein tyrosine kinase signaling pathway	24	1.89125	0.0337837	ENSG00000104368, ENSG00000165731, ENSG00000118972, ENSG00000168398, ENSG00000179295, ENSG00000168546, ENSG00000111241, ENSG00000077782, ENSG00000185950, ENSG00000109458, ENSG00000085832, ENSG00000187840, ENSG00000164418, ENSG00000145431, ENSG00000146247, ENSG00000142208, ENSG00000107404, ENSG00000134259, ENSG00000204217, ENSG00000118523, ENSG00000140443, ENSG00000151694, ENSG00000078579, ENSG0000…	928	224	13528	1.56188	1	0.666825	46.4533
GOTERM_BP_FAT	GO:0002521~leukocyte differentiation	16	1.26084	0.0344473	ENSG00000026103, ENSG00000076554, ENSG00000048052, ENSG00000153879, ENSG00000067082, ENSG00000071564, ENSG00000171791, ENSG00000164935, ENSG00000184916, ENSG00000165409, ENSG00000169508, ENSG00000124391, ENSG00000081087, ENSG00000151694, ENSG00000119866, ENSG00000111732	928	131	13528	1.78047	1	0.670499	47.1178
GOTERM_BP_FAT	GO:0031589~cell-substrate adhesion	13	1.02443	0.0353253	ENSG00000132470, ENSG00000138964, ENSG00000171791, ENSG00000110799, ENSG00000112033, ENSG00000119185, ENSG00000127990, ENSG00000077943, ENSG00000118523, ENSG00000077522, ENSG00000168615, ENSG00000008710, ENSG00000091136	928	98	13528	1.93376	1	0.676331	47.985
GOTERM_BP_FAT	GO:0055001~muscle cell development	9	0.70922	0.0359424	ENSG00000163217, ENSG00000138814, ENSG00000187957, ENSG00000107404, ENSG00000070748, ENSG00000078618, ENSG00000133392, ENSG00000143632, ENSG00000141385	928	56	13528	2.34283	1	0.679276	48.5865
GOTERM_BP_FAT	GO:0009207~purine ribonucleoside triphosphate catabolic process	5	0.394011	0.0371455	ENSG00000091262, ENSG00000138185, ENSG00000163161, ENSG00000119541, ENSG00000131979	928	19	13528	3.83621	1	0.688037	49.7401
GOTERM_BP_FAT	GO:0048536~spleen development	5	0.394011	0.0371455	ENSG00000008083, ENSG00000171791, ENSG00000026103, ENSG00000151694, ENSG00000077150	928	19	13528	3.83621	1	0.688037	49.7401
GOTERM_BP_FAT	GO:0009203~ribonucleoside triphosphate catabolic process	5	0.394011	0.0371455	ENSG00000091262, ENSG00000138185, ENSG00000163161, ENSG00000119541, ENSG00000131979	928	19	13528	3.83621	1	0.688037	49.7401
GOTERM_BP_FAT	GO:0030802~regulation of cyclic nucleotide biosynthetic process	14	1.10323	0.0376367	ENSG00000112038, ENSG00000182687, ENSG00000087494, ENSG00000155897, ENSG00000180616, ENSG00000082556, ENSG00000151617, ENSG00000188778, ENSG00000128266, ENSG00000165409, ENSG00000198822, ENSG00000164128, ENSG00000112164, ENSG00000164116	928	110	13528	1.85533	1	0.68949	50.2041
GOTERM_BP_FAT	GO:0030808~regulation of nucleotide biosynthetic process	14	1.10323	0.0376367	ENSG00000112038, ENSG00000182687, ENSG00000087494, ENSG00000155897, ENSG00000180616, ENSG00000082556, ENSG00000151617, ENSG00000188778, ENSG00000128266, ENSG00000165409, ENSG00000198822, ENSG00000164128, ENSG00000112164, ENSG00000164116	928	110	13528	1.85533	1	0.68949	50.2041
GOTERM_BP_FAT	GO:0031279~regulation of cyclase activity	13	1.02443	0.0377987	ENSG00000112038, ENSG00000182687, ENSG00000087494, ENSG00000155897, ENSG00000180616, ENSG00000082556, ENSG00000151617, ENSG00000188778, ENSG00000165409, ENSG00000128266, ENSG00000198822, ENSG00000164128, ENSG00000112164	928	99	13528	1.91423	1	0.687701	50.3562
GOTERM_BP_FAT	GO:0032870~cellular response to hormone stimulus	16	1.26084	0.0386555	ENSG00000147465, ENSG00000168243, ENSG00000118971, ENSG00000179295, ENSG00000142784, ENSG00000155897, ENSG00000185950, ENSG00000109458, ENSG00000174021, ENSG00000048052, ENSG00000187840, ENSG00000146247, ENSG00000142208, ENSG00000142875, ENSG00000140443, ENSG00000005249	928	133	13528	1.75369	1	0.692653	51.1535
GOTERM_BP_FAT	GO:0016265~death	63	4.96454	0.0389873	ENSG00000182168, ENSG00000151923, ENSG00000026103, ENSG00000165806, ENSG00000176907, ENSG00000156687, ENSG00000156735, ENSG00000177595, ENSG00000151929, ENSG00000148481, ENSG00000163947, ENSG00000124788, ENSG00000131653, ENSG00000106105, ENSG00000117862, ENSG00000118503, ENSG00000127863, ENSG00000075790, ENSG00000169372, ENSG00000182985, ENSG00000134398, ENSG00000176919, ENSG00000164418, ENSG0000…	928	724	13528	1.26849	1	0.692503	51.459
GOTERM_BP_FAT	GO:0030278~regulation of ossification	11	0.866824	0.0397021	ENSG00000188064, ENSG00000118972, ENSG00000171791, ENSG00000138696, ENSG00000104332, ENSG00000166949, ENSG00000204217, ENSG00000151090, ENSG00000107779, ENSG00000170365, ENSG00000125398	928	78	13528	2.05581	1	0.695941	52.1111
GOTERM_BP_FAT	GO:0051347~positive regulation of transferase activity	25	1.97006	0.0399584	ENSG00000118971, ENSG00000155897, ENSG00000109458, ENSG00000171517, ENSG00000145431, ENSG00000181634, ENSG00000142875, ENSG00000143674, ENSG00000109270, ENSG00000168615, ENSG00000131653, ENSG00000151694, ENSG00000005249, ENSG00000127191, ENSG00000176170, ENSG00000179295, ENSG00000100739, ENSG00000133703, ENSG00000164342, ENSG00000170927, ENSG00000151617, ENSG00000142208, ENSG00000115825, ENSG0000…	928	240	13528	1.5185	1	0.695071	52.3428
GOTERM_BP_FAT	GO:0006924~activation-induced cell death of T cells	3	0.236407	0.0408158	ENSG00000184990, ENSG00000142208, ENSG00000026103	928	5	13528	8.74655	1	0.699696	53.1104
GOTERM_BP_FAT	GO:0032847~regulation of cellular pH reduction	3	0.236407	0.0408158	ENSG00000166148, ENSG00000171791, ENSG00000104267	928	5	13528	8.74655	1	0.699696	53.1104
GOTERM_BP_FAT	GO:0070231~T cell apoptosis	3	0.236407	0.0408158	ENSG00000184990, ENSG00000142208, ENSG00000026103	928	5	13528	8.74655	1	0.699696	53.1104
GOTERM_BP_FAT	GO:0042325~regulation of phosphorylation	43	3.38849	0.0410657	ENSG00000180210, ENSG00000118971, ENSG00000155897, ENSG00000110768, ENSG00000107779, ENSG00000109458, ENSG00000167965, ENSG00000171517, ENSG00000163217, ENSG00000145431, ENSG00000177606, ENSG00000171791, ENSG00000181634, ENSG00000124788, ENSG00000143674, ENSG00000142875, ENSG00000204217, ENSG00000109270, ENSG00000168615, ENSG00000151694, ENSG00000131653, ENSG00000005249, ENSG00000176170, ENSG0000…	928	466	13528	1.34514	1	0.698765	53.332
GOTERM_BP_FAT	GO:0032869~cellular response to insulin stimulus	10	0.788022	0.0416163	ENSG00000147465, ENSG00000146247, ENSG00000118971, ENSG00000142208, ENSG00000142784, ENSG00000185950, ENSG00000140443, ENSG00000109458, ENSG00000048052, ENSG00000187840	928	68	13528	2.14376	1	0.700525	53.8166
GOTERM_BP_FAT	GO:0045597~positive regulation of cell differentiation	24	1.89125	0.0418499	ENSG00000147465, ENSG00000138696, ENSG00000112033, ENSG00000166949, ENSG00000107779, ENSG00000185008, ENSG00000170365, ENSG00000115091, ENSG00000185652, ENSG00000151615, ENSG00000188064, ENSG00000173157, ENSG00000177606, ENSG00000171791, ENSG00000104267, ENSG00000142208, ENSG00000156642, ENSG00000134259, ENSG00000125820, ENSG00000204217, ENSG00000159216, ENSG00000151090, ENSG00000109320, ENSG0000…	928	229	13528	1.52778	1	0.699463	54.0208
GOTERM_BP_FAT	GO:0030163~protein catabolic process	55	4.33412	0.0421846	ENSG00000105879, ENSG00000145416, ENSG00000103264, ENSG00000178974, ENSG00000167671, ENSG00000074319, ENSG00000168615, ENSG00000131653, ENSG00000164109, ENSG00000159069, ENSG00000118503, ENSG00000147475, ENSG00000145390, ENSG00000107872, ENSG00000123124, ENSG00000134758, ENSG00000174010, ENSG00000078304, ENSG00000185104, ENSG00000007944, ENSG00000142208, ENSG00000138134, ENSG00000170142, ENSG0000…	928	622	13528	1.28901	1	0.699302	54.3118
GOTERM_BP_FAT	GO:0007588~excretion	9	0.70922	0.0430777	ENSG00000171365, ENSG00000091138, ENSG00000166126, ENSG00000151067, ENSG00000115353, ENSG00000164626, ENSG00000168447, ENSG00000151623, ENSG00000166828	928	58	13528	2.26204	1	0.703958	55.0799
GOTERM_BP_FAT	GO:0030817~regulation of cAMP biosynthetic process	13	1.02443	0.0431065	ENSG00000112038, ENSG00000182687, ENSG00000087494, ENSG00000155897, ENSG00000180616, ENSG00000082556, ENSG00000151617, ENSG00000188778, ENSG00000165409, ENSG00000128266, ENSG00000198822, ENSG00000164128, ENSG00000112164	928	101	13528	1.87632	1	0.701161	55.1045
GOTERM_BP_FAT	GO:0051339~regulation of lyase activity	13	1.02443	0.0431065	ENSG00000112038, ENSG00000182687, ENSG00000087494, ENSG00000155897, ENSG00000180616, ENSG00000082556, ENSG00000151617, ENSG00000188778, ENSG00000165409, ENSG00000128266, ENSG00000198822, ENSG00000164128, ENSG00000112164	928	101	13528	1.87632	1	0.701161	55.1045
GOTERM_BP_FAT	GO:0046688~response to copper ion	4	0.315209	0.0442729	ENSG00000171791, ENSG00000171867, ENSG00000109610, ENSG00000129673	928	12	13528	4.8592	1	0.707982	56.0887
GOTERM_BP_FAT	GO:0009725~response to hormone stimulus	35	2.75808	0.0447357	ENSG00000147465, ENSG00000168243, ENSG00000118971, ENSG00000155897, ENSG00000185950, ENSG00000026103, ENSG00000109458, ENSG00000174021, ENSG00000129673, ENSG00000187840, ENSG00000146247, ENSG00000171791, ENSG00000140545, ENSG00000142875, ENSG00000140443, ENSG00000168615, ENSG00000164128, ENSG00000005249, ENSG00000172379, ENSG00000166148, ENSG00000134200, ENSG00000179295, ENSG00000142784, ENSG0000…	928	367	13528	1.39023	1	0.708823	56.4736
GOTERM_BP_FAT	GO:0055082~cellular chemical homeostasis	36	2.83688	0.0452406	ENSG00000118972, ENSG00000182687, ENSG00000180210, ENSG00000107562, ENSG00000183023, ENSG00000109738, ENSG00000221978, ENSG00000171517, ENSG00000177606, ENSG00000171791, ENSG00000154118, ENSG00000124788, ENSG00000047249, ENSG00000166501, ENSG00000183454, ENSG00000164128, ENSG00000010278, ENSG00000112164, ENSG00000166148, ENSG00000168398, ENSG00000142784, ENSG00000151067, ENSG00000112033, ENSG0000…	928	380	13528	1.38103	1	0.709992	56.8898
GOTERM_BP_FAT	GO:0030799~regulation of cyclic nucleotide metabolic process	14	1.10323	0.0452728	ENSG00000112038, ENSG00000182687, ENSG00000087494, ENSG00000155897, ENSG00000180616, ENSG00000082556, ENSG00000151617, ENSG00000188778, ENSG00000128266, ENSG00000165409, ENSG00000198822, ENSG00000164128, ENSG00000112164, ENSG00000164116	928	113	13528	1.80607	1	0.707321	56.9162
GOTERM_BP_FAT	GO:0044093~positive regulation of molecular function	52	4.09771	0.0455315	ENSG00000182687, ENSG00000109458, ENSG00000153879, ENSG00000171517, ENSG00000142875, ENSG00000168615, ENSG00000131653, ENSG00000005249, ENSG00000112164, ENSG00000176170, ENSG00000166148, ENSG00000179295, ENSG00000115353, ENSG00000087494, ENSG00000164342, ENSG00000107223, ENSG00000069702, ENSG00000151617, ENSG00000142208, ENSG00000188778, ENSG00000170142, ENSG00000165409, ENSG00000115825, ENSG0000…	928	586	13528	1.29357	1	0.706506	57.1279
GOTERM_BP_FAT	GO:0051603~proteolysis involved in cellular protein catabolic process	53	4.17652	0.0462946	ENSG00000105879, ENSG00000145416, ENSG00000103264, ENSG00000178974, ENSG00000167671, ENSG00000074319, ENSG00000168615, ENSG00000131653, ENSG00000164109, ENSG00000159069, ENSG00000118503, ENSG00000147475, ENSG00000145390, ENSG00000107872, ENSG00000123124, ENSG00000134758, ENSG00000174010, ENSG00000078304, ENSG00000185104, ENSG00000007944, ENSG00000138134, ENSG00000170142, ENSG00000197530, ENSG0000…	928	600	13528	1.28769	1	0.709735	57.7466
GOTERM_BP_FAT	GO:0008219~cell death	62	4.88574	0.0472731	ENSG00000182168, ENSG00000151923, ENSG00000026103, ENSG00000165806, ENSG00000176907, ENSG00000156687, ENSG00000156735, ENSG00000177595, ENSG00000151929, ENSG00000148481, ENSG00000163947, ENSG00000124788, ENSG00000131653, ENSG00000106105, ENSG00000117862, ENSG00000118503, ENSG00000127863, ENSG00000075790, ENSG00000169372, ENSG00000182985, ENSG00000134398, ENSG00000176919, ENSG00000164418, ENSG0000…	928	719	13528	1.25704	1	0.714559	58.5276
GOTERM_BP_FAT	GO:0030098~lymphocyte differentiation	13	1.02443	0.0489111	ENSG00000026103, ENSG00000076554, ENSG00000048052, ENSG00000153879, ENSG00000067082, ENSG00000071564, ENSG00000171791, ENSG00000184916, ENSG00000165409, ENSG00000169508, ENSG00000151694, ENSG00000119866, ENSG00000111732	928	103	13528	1.83989	1	0.724191	59.8045
GOTERM_BP_FAT	GO:0030814~regulation of cAMP metabolic process	13	1.02443	0.0489111	ENSG00000112038, ENSG00000182687, ENSG00000087494, ENSG00000155897, ENSG00000180616, ENSG00000082556, ENSG00000151617, ENSG00000188778, ENSG00000165409, ENSG00000128266, ENSG00000198822, ENSG00000164128, ENSG00000112164	928	103	13528	1.83989	1	0.724191	59.8045
GOTERM_BP_FAT	GO:0051090~regulation of transcription factor activity	13	1.02443	0.0489111	ENSG00000142655, ENSG00000104365, ENSG00000087494, ENSG00000164342, ENSG00000133703, ENSG00000153879, ENSG00000184990, ENSG00000069702, ENSG00000137504, ENSG00000121691, ENSG00000129654, ENSG00000142867, ENSG00000165672	928	103	13528	1.83989	1	0.724191	59.8045
GOTERM_BP_FAT	GO:0007178~transmembrane receptor protein serine/threonine kinase signaling pathway	13	1.02443	0.0489111	ENSG00000138696, ENSG00000115306, ENSG00000166949, ENSG00000107779, ENSG00000157077, ENSG00000170365, ENSG00000163217, ENSG00000069702, ENSG00000177606, ENSG00000095739, ENSG00000204217, ENSG00000168615, ENSG00000164692	928	103	13528	1.83989	1	0.724191	59.8045
GOTERM_BP_FAT	GO:0051174~regulation of phosphorus metabolic process	44	3.4673	0.049249	ENSG00000180210, ENSG00000118971, ENSG00000166949, ENSG00000155897, ENSG00000110768, ENSG00000107779, ENSG00000109458, ENSG00000167965, ENSG00000171517, ENSG00000163217, ENSG00000145431, ENSG00000177606, ENSG00000171791, ENSG00000181634, ENSG00000124788, ENSG00000143674, ENSG00000142875, ENSG00000204217, ENSG00000109270, ENSG00000168615, ENSG00000151694, ENSG00000131653, ENSG00000005249, ENSG0000…	928	485	13528	1.3225	1	0.723913	60.0633
GOTERM_BP_FAT	GO:0019220~regulation of phosphate metabolic process	44	3.4673	0.049249	ENSG00000180210, ENSG00000118971, ENSG00000166949, ENSG00000155897, ENSG00000110768, ENSG00000107779, ENSG00000109458, ENSG00000167965, ENSG00000171517, ENSG00000163217, ENSG00000145431, ENSG00000177606, ENSG00000171791, ENSG00000181634, ENSG00000124788, ENSG00000143674, ENSG00000142875, ENSG00000204217, ENSG00000109270, ENSG00000168615, ENSG00000151694, ENSG00000131653, ENSG00000005249, ENSG0000…	928	485	13528	1.3225	1	0.723913	60.0633
GOTERM_BP_FAT	GO:0010557~positive regulation of macromolecule biosynthetic process	57	4.49173	0.0492599	ENSG00000169946, ENSG00000138795, ENSG00000185024, ENSG00000083635, ENSG00000110768, ENSG00000196664, ENSG00000153879, ENSG00000124788, ENSG00000172379, ENSG00000198791, ENSG00000135373, ENSG00000116044, ENSG00000164342, ENSG00000197905, ENSG00000125398, ENSG00000185652, ENSG00000187735, ENSG00000151615, ENSG00000067082, ENSG00000065970, ENSG00000142208, ENSG00000075891, ENSG00000125850, ENSG0000…	928	654	13528	1.27052	1	0.721226	60.0716
GOTERM_BP_FAT	GO:0044257~cellular protein catabolic process	53	4.17652	0.0501596	ENSG00000105879, ENSG00000145416, ENSG00000103264, ENSG00000178974, ENSG00000167671, ENSG00000074319, ENSG00000168615, ENSG00000131653, ENSG00000164109, ENSG00000159069, ENSG00000118503, ENSG00000147475, ENSG00000145390, ENSG00000107872, ENSG00000123124, ENSG00000134758, ENSG00000174010, ENSG00000078304, ENSG00000185104, ENSG00000007944, ENSG00000138134, ENSG00000170142, ENSG00000197530, ENSG0000…	928	603	13528	1.28128	1	0.725082	60.7527
GOTERM_BP_FAT	GO:0045934~negative regulation of nucleobase, nucleoside, nucleotide and nucleic acid metabolic process	46	3.6249	0.0506042	ENSG00000198081, ENSG00000142655, ENSG00000169946, ENSG00000138795, ENSG00000182521, ENSG00000083168, ENSG00000166949, ENSG00000172059, ENSG00000159692, ENSG00000167513, ENSG00000124788, ENSG00000151090, ENSG00000074319, ENSG00000159263, ENSG00000060138, ENSG00000074266, ENSG00000129654, ENSG00000122691, ENSG00000142784, ENSG00000112033, ENSG00000077092, ENSG00000177425, ENSG00000123124, ENSG0000…	928	512	13528	1.30971	1	0.725577	61.0853
GOTERM_BP_FAT	GO:0030500~regulation of bone mineralization	6	0.472813	0.0510416	ENSG00000118972, ENSG00000138696, ENSG00000166949, ENSG00000204217, ENSG00000107779, ENSG00000125398	928	30	13528	2.91552	1	0.726013	61.4099
GOTERM_BP_FAT	GO:0007612~learning	9	0.70922	0.0510896	ENSG00000177606, ENSG00000151067, ENSG00000124788, ENSG00000115353, ENSG00000133703, ENSG00000169862, ENSG00000183454, ENSG00000005249, ENSG00000174775	928	60	13528	2.18664	1	0.723677	61.4454
GOTERM_BP_FAT	GO:0007179~transforming growth factor beta receptor signaling pathway	9	0.70922	0.0510896	ENSG00000069702, ENSG00000177606, ENSG00000095739, ENSG00000166949, ENSG00000157077, ENSG00000107779, ENSG00000168615, ENSG00000164692, ENSG00000170365	928	60	13528	2.18664	1	0.723677	61.4454
GOTERM_BP_FAT	GO:0006366~transcription from RNA polymerase II promoter	24	1.89125	0.0512491	ENSG00000177700, ENSG00000116044, ENSG00000182521, ENSG00000165417, ENSG00000213079, ENSG00000134532, ENSG00000163161, ENSG00000188342, ENSG00000110768, ENSG00000122882, ENSG00000172059, ENSG00000129691, ENSG00000090061, ENSG00000187735, ENSG00000131196, ENSG00000186951, ENSG00000143013, ENSG00000070047, ENSG00000115816, ENSG00000204217, ENSG00000075891, ENSG00000185507, ENSG00000109320, ENSG0000…	928	234	13528	1.49514	1	0.722151	61.563
GOTERM_BP_FAT	GO:0009146~purine nucleoside triphosphate catabolic process	5	0.394011	0.0515007	ENSG00000091262, ENSG00000138185, ENSG00000163161, ENSG00000119541, ENSG00000131979	928	21	13528	3.47085	1	0.721294	61.7478
GOTERM_BP_FAT	GO:0048169~regulation of long-term neuronal synaptic plasticity	5	0.394011	0.0515007	ENSG00000164418, ENSG00000156642, ENSG00000133703, ENSG00000183454, ENSG00000174775	928	21	13528	3.47085	1	0.721294	61.7478
GOTERM_BP_FAT	GO:0001569~patterning of blood vessels	5	0.394011	0.0515007	ENSG00000151617, ENSG00000107562, ENSG00000142871, ENSG00000102755, ENSG00000164532	928	21	13528	3.47085	1	0.721294	61.7478
GOTERM_BP_FAT	GO:0007030~Golgi organization	5	0.394011	0.0515007	ENSG00000119787, ENSG00000166685, ENSG00000149196, ENSG00000107651, ENSG00000159692	928	21	13528	3.47085	1	0.721294	61.7478
GOTERM_BP_FAT	GO:0030198~extracellular matrix organization	13	1.02443	0.0520048	ENSG00000179403, ENSG00000077943, ENSG00000122884, ENSG00000157766, ENSG00000171509, ENSG00000173157, ENSG00000143196, ENSG00000147408, ENSG00000131981, ENSG00000142871, ENSG00000164692, ENSG00000077150, ENSG00000133392	928	104	13528	1.8222	1	0.722228	62.1156
GOTERM_BP_FAT	GO:0051259~protein oligomerization	19	1.49724	0.0523333	ENSG00000147647, ENSG00000119787, ENSG00000142655, ENSG00000110799, ENSG00000109738, ENSG00000026103, ENSG00000144481, ENSG00000138758, ENSG00000146197, ENSG00000021574, ENSG00000171867, ENSG00000159307, ENSG00000077522, ENSG00000122545, ENSG00000140443, ENSG00000121691, ENSG00000174775, ENSG00000131979, ENSG00000142867	928	174	13528	1.59181	1	0.721923	62.3535
GOTERM_BP_FAT	GO:0050678~regulation of epithelial cell proliferation	10	0.788022	0.05256	ENSG00000069702, ENSG00000151617, ENSG00000118971, ENSG00000112033, ENSG00000166949, ENSG00000115353, ENSG00000107779, ENSG00000137764, ENSG00000111276, ENSG00000091136	928	71	13528	2.05318	1	0.720915	62.5168
GOTERM_BP_FAT	GO:0032846~positive regulation of homeostatic process	7	0.551615	0.0531595	ENSG00000166148, ENSG00000180210, ENSG00000151617, ENSG00000104267, ENSG00000100739, ENSG00000115353, ENSG00000107854	928	40	13528	2.55108	1	0.722493	62.9455
GOTERM_BP_FAT	GO:0045165~cell fate commitment	16	1.26084	0.0534723	ENSG00000119614, ENSG00000134532, ENSG00000138083, ENSG00000197905, ENSG00000170365, ENSG00000005513, ENSG00000125398, ENSG00000185652, ENSG00000071564, ENSG00000143178, ENSG00000171791, ENSG00000125820, ENSG00000075891, ENSG00000184916, ENSG00000112333, ENSG00000164056	928	139	13528	1.678	1	0.722089	63.1674
GOTERM_BP_FAT	GO:0006140~regulation of nucleotide metabolic process	14	1.10323	0.0539262	ENSG00000112038, ENSG00000182687, ENSG00000087494, ENSG00000155897, ENSG00000180616, ENSG00000082556, ENSG00000151617, ENSG00000188778, ENSG00000128266, ENSG00000165409, ENSG00000198822, ENSG00000164128, ENSG00000112164, ENSG00000164116	928	116	13528	1.75936	1	0.722648	63.4871
GOTERM_BP_FAT	GO:0048534~hemopoietic or lymphoid organ development	26	2.04886	0.0539936	ENSG00000111252, ENSG00000083168, ENSG00000076554, ENSG00000026103, ENSG00000129691, ENSG00000153879, ENSG00000171791, ENSG00000071564, ENSG00000164935, ENSG00000184916, ENSG00000151694, ENSG00000048052, ENSG00000187735, ENSG00000008083, ENSG00000067082, ENSG00000069702, ENSG00000159216, ENSG00000141655, ENSG00000165409, ENSG00000169508, ENSG00000124391, ENSG00000081087, ENSG00000077150, ENSG0000…	928	260	13528	1.45776	1	0.72059	63.5344
GOTERM_BP_FAT	GO:0016049~cell growth	9	0.70922	0.0554327	ENSG00000151615, ENSG00000069702, ENSG00000171791, ENSG00000198964, ENSG00000077782, ENSG00000147548, ENSG00000078579, ENSG00000088930, ENSG00000143632	928	61	13528	2.15079	1	0.727709	64.5295
GOTERM_BP_FAT	GO:0050808~synapse organization	9	0.70922	0.0554327	ENSG00000188064, ENSG00000187957, ENSG00000151150, ENSG00000107404, ENSG00000070748, ENSG00000182985, ENSG00000078618, ENSG00000152192, ENSG00000141385	928	61	13528	2.15079	1	0.727709	64.5295
GOTERM_BP_FAT	GO:0006873~cellular ion homeostasis	35	2.75808	0.055727	ENSG00000118972, ENSG00000182687, ENSG00000180210, ENSG00000107562, ENSG00000183023, ENSG00000109738, ENSG00000221978, ENSG00000171517, ENSG00000177606, ENSG00000171791, ENSG00000154118, ENSG00000124788, ENSG00000047249, ENSG00000166501, ENSG00000183454, ENSG00000164128, ENSG00000010278, ENSG00000112164, ENSG00000166148, ENSG00000168398, ENSG00000151067, ENSG00000112033, ENSG00000100739, ENSG0000…	928	374	13528	1.36421	1	0.727171	64.7298
GOTERM_BP_FAT	GO:0030182~neuron differentiation	40	3.15209	0.0559616	ENSG00000165731, ENSG00000182687, ENSG00000151150, ENSG00000138696, ENSG00000107562, ENSG00000077782, ENSG00000182168, ENSG00000130675, ENSG00000171791, ENSG00000055732, ENSG00000159674, ENSG00000078246, ENSG00000184916, ENSG00000125820, ENSG00000136854, ENSG00000140443, ENSG00000078579, ENSG00000152192, ENSG00000091136, ENSG00000119614, ENSG00000179295, ENSG00000185532, ENSG00000134532, ENSG0000…	928	438	13528	1.33129	1	0.72625	64.8887
GOTERM_BP_FAT	GO:0014031~mesenchymal cell development	8	0.630418	0.0577223	ENSG00000131196, ENSG00000165731, ENSG00000069702, ENSG00000151617, ENSG00000138795, ENSG00000171791, ENSG00000125850, ENSG00000125398	928	51	13528	2.28668	1	0.735093	66.06
GOTERM_BP_FAT	GO:0048762~mesenchymal cell differentiation	8	0.630418	0.0577223	ENSG00000131196, ENSG00000165731, ENSG00000069702, ENSG00000151617, ENSG00000138795, ENSG00000171791, ENSG00000125850, ENSG00000125398	928	51	13528	2.28668	1	0.735093	66.06
GOTERM_BP_FAT	GO:0009166~nucleotide catabolic process	8	0.630418	0.0577223	ENSG00000091262, ENSG00000138185, ENSG00000138735, ENSG00000163161, ENSG00000023697, ENSG00000119541, ENSG00000131979, ENSG00000197217	928	51	13528	2.28668	1	0.735093	66.06
GOTERM_BP_FAT	GO:0006811~ion transport	65	5.12214	0.058158	ENSG00000006116, ENSG00000183605, ENSG00000183023, ENSG00000109738, ENSG00000047617, ENSG00000120519, ENSG00000164626, ENSG00000124780, ENSG00000170289, ENSG00000180332, ENSG00000166828, ENSG00000171365, ENSG00000141540, ENSG00000139155, ENSG00000111371, ENSG00000154118, ENSG00000139151, ENSG00000089057, ENSG00000182771, ENSG00000109158, ENSG00000183454, ENSG00000118507, ENSG00000111262, ENSG0000…	928	768	13528	1.23378	1	0.735418	66.3441
GOTERM_BP_FAT	GO:0001775~cell activation	28	2.20646	0.0583765	ENSG00000180210, ENSG00000107562, ENSG00000166949, ENSG00000026103, ENSG00000076554, ENSG00000153879, ENSG00000196664, ENSG00000171791, ENSG00000071564, ENSG00000139151, ENSG00000184916, ENSG00000136854, ENSG00000168615, ENSG00000151694, ENSG00000010278, ENSG00000153064, ENSG00000110799, ENSG00000138185, ENSG00000164342, ENSG00000048052, ENSG00000124333, ENSG00000067082, ENSG00000092929, ENSG0000…	928	287	13528	1.4222	1	0.734392	66.4857
GOTERM_BP_FAT	GO:0052572~response to host immune response	3	0.236407	0.0584824	ENSG00000164342, ENSG00000196664, ENSG00000164116	928	6	13528	7.28879	1	0.732677	66.5542
GOTERM_BP_FAT	GO:0052509~positive regulation by symbiont of host defense response	3	0.236407	0.0584824	ENSG00000164342, ENSG00000185507, ENSG00000196664	928	6	13528	7.28879	1	0.732677	66.5542
GOTERM_BP_FAT	GO:0052510~positive regulation by organism of defense response of other organism during symbiotic interaction	3	0.236407	0.0584824	ENSG00000164342, ENSG00000185507, ENSG00000196664	928	6	13528	7.28879	1	0.732677	66.5542
GOTERM_BP_FAT	GO:0052031~modulation by symbiont of host defense response	3	0.236407	0.0584824	ENSG00000164342, ENSG00000185507, ENSG00000196664	928	6	13528	7.28879	1	0.732677	66.5542
GOTERM_BP_FAT	GO:0052564~response to immune response of other organism during symbiotic interaction	3	0.236407	0.0584824	ENSG00000164342, ENSG00000196664, ENSG00000164116	928	6	13528	7.28879	1	0.732677	66.5542
GOTERM_BP_FAT	GO:0052255~modulation by organism of defense response of other organism during symbiotic interaction	3	0.236407	0.0584824	ENSG00000164342, ENSG00000185507, ENSG00000196664	928	6	13528	7.28879	1	0.732677	66.5542
GOTERM_BP_FAT	GO:0010553~negative regulation of specific transcription from RNA polymerase II promoter	7	0.551615	0.0588231	ENSG00000186951, ENSG00000142784, ENSG00000166949, ENSG00000109320, ENSG00000048052, ENSG00000129654, ENSG00000177565	928	41	13528	2.48886	1	0.73243	66.7734
GOTERM_BP_FAT	GO:0051092~positive regulation of NF-kappaB transcription factor activity	7	0.551615	0.0588231	ENSG00000069702, ENSG00000104365, ENSG00000164342, ENSG00000133703, ENSG00000121691, ENSG00000142867, ENSG00000165672	928	41	13528	2.48886	1	0.73243	66.7734
GOTERM_BP_FAT	GO:0048812~neuron projection morphogenesis	22	1.73365	0.0588433	ENSG00000151150, ENSG00000138696, ENSG00000179295, ENSG00000107562, ENSG00000182168, ENSG00000185008, ENSG00000170927, ENSG00000185652, ENSG00000116957, ENSG00000151615, ENSG00000075213, ENSG00000171791, ENSG00000159674, ENSG00000107404, ENSG00000165300, ENSG00000198947, ENSG00000075891, ENSG00000136854, ENSG00000140443, ENSG00000112333, ENSG00000152192, ENSG00000141385	928	213	13528	1.50567	1	0.730209	66.7864
GOTERM_BP_FAT	GO:0008284~positive regulation of cell proliferation	38	2.99448	0.0589726	ENSG00000118971, ENSG00000140945, ENSG00000077782, ENSG00000107779, ENSG00000185950, ENSG00000105835, ENSG00000163217, ENSG00000145431, ENSG00000177606, ENSG00000171791, ENSG00000140545, ENSG00000071564, ENSG00000111728, ENSG00000140443, ENSG00000151694, ENSG00000164129, ENSG00000172379, ENSG00000174775, ENSG00000091136, ENSG00000176170, ENSG00000166148, ENSG00000119614, ENSG00000112033, ENSG0000…	928	414	13528	1.33804	1	0.728674	66.8693
GOTERM_BP_FAT	GO:0008633~activation of pro-apoptotic gene products	5	0.394011	0.05966	ENSG00000171791, ENSG00000142208, ENSG00000166949, ENSG00000026103, ENSG00000127191	928	22	13528	3.31309	1	0.730582	67.3063
GOTERM_BP_FAT	GO:0006006~glucose metabolic process	17	1.33964	0.0596861	ENSG00000067992, ENSG00000142657, ENSG00000112033, ENSG00000142784, ENSG00000164022, ENSG00000197444, ENSG00000185950, ENSG00000119938, ENSG00000004799, ENSG00000142208, ENSG00000159322, ENSG00000151116, ENSG00000111713, ENSG00000105220, ENSG00000164128, ENSG00000186197, ENSG00000111716	928	153	13528	1.61973	1	0.728437	67.3228
GOTERM_BP_FAT	GO:0051480~cytosolic calcium ion homeostasis	14	1.10323	0.0602831	ENSG00000166148, ENSG00000180210, ENSG00000151617, ENSG00000182687, ENSG00000168398, ENSG00000154118, ENSG00000151067, ENSG00000100739, ENSG00000183023, ENSG00000115353, ENSG00000164128, ENSG00000221978, ENSG00000112164, ENSG00000171517	928	118	13528	1.72954	1	0.729779	67.6978
GOTERM_BP_FAT	GO:0051172~negative regulation of nitrogen compound metabolic process	46	3.6249	0.0603704	ENSG00000198081, ENSG00000142655, ENSG00000169946, ENSG00000138795, ENSG00000182521, ENSG00000083168, ENSG00000166949, ENSG00000172059, ENSG00000159692, ENSG00000167513, ENSG00000124788, ENSG00000151090, ENSG00000074319, ENSG00000159263, ENSG00000060138, ENSG00000074266, ENSG00000129654, ENSG00000122691, ENSG00000142784, ENSG00000112033, ENSG00000077092, ENSG00000177425, ENSG00000123124, ENSG0000…	928	519	13528	1.29204	1	0.728032	67.7523
GOTERM_BP_FAT	GO:0016337~cell-cell adhesion	27	2.12766	0.0614628	ENSG00000165731, ENSG00000105879, ENSG00000140945, ENSG00000138696, ENSG00000046604, ENSG00000157766, ENSG00000008710, ENSG00000171791, ENSG00000156642, ENSG00000136854, ENSG00000118523, ENSG00000169862, ENSG00000168615, ENSG00000165376, ENSG00000148600, ENSG00000111241, ENSG00000077943, ENSG00000128536, ENSG00000185008, ENSG00000081138, ENSG00000170927, ENSG00000182985, ENSG00000125398, ENSG0000…	928	276	13528	1.42607	1	0.732316	68.427
GOTERM_BP_FAT	GO:0002520~immune system development	27	2.12766	0.0614628	ENSG00000111252, ENSG00000083168, ENSG00000076554, ENSG00000026103, ENSG00000129691, ENSG00000153879, ENSG00000171791, ENSG00000071564, ENSG00000164935, ENSG00000184916, ENSG00000151694, ENSG00000129654, ENSG00000048052, ENSG00000187735, ENSG00000008083, ENSG00000067082, ENSG00000069702, ENSG00000159216, ENSG00000141655, ENSG00000165409, ENSG00000169508, ENSG00000124391, ENSG00000081087, ENSG0000…	928	276	13528	1.42607	1	0.732316	68.427
GOTERM_BP_FAT	GO:0060485~mesenchyme development	8	0.630418	0.0629431	ENSG00000131196, ENSG00000165731, ENSG00000069702, ENSG00000151617, ENSG00000138795, ENSG00000171791, ENSG00000125850, ENSG00000125398	928	52	13528	2.24271	1	0.738728	69.3199
GOTERM_BP_FAT	GO:0051291~protein heterooligomerization	8	0.630418	0.0629431	ENSG00000146197, ENSG00000109738, ENSG00000140443, ENSG00000122545, ENSG00000138758, ENSG00000174775, ENSG00000142867, ENSG00000131979	928	52	13528	2.24271	1	0.738728	69.3199
GOTERM_BP_FAT	GO:0007219~Notch signaling pathway	8	0.630418	0.0629431	ENSG00000163217, ENSG00000071537, ENSG00000187957, ENSG00000197530, ENSG00000184916, ENSG00000134115, ENSG00000138442, ENSG00000151694	928	52	13528	2.24271	1	0.738728	69.3199
GOTERM_BP_FAT	GO:0016050~vesicle organization	8	0.630418	0.0629431	ENSG00000118308, ENSG00000171791, ENSG00000107862, ENSG00000136854, ENSG00000047579, ENSG00000085832, ENSG00000143669, ENSG00000124333	928	52	13528	2.24271	1	0.738728	69.3199
GOTERM_BP_FAT	GO:0007610~behavior	42	3.30969	0.0636248	ENSG00000182687, ENSG00000107562, ENSG00000164022, ENSG00000155897, ENSG00000109738, ENSG00000221978, ENSG00000152977, ENSG00000198931, ENSG00000177606, ENSG00000171791, ENSG00000055732, ENSG00000124788, ENSG00000169862, ENSG00000183454, ENSG00000142871, ENSG00000164129, ENSG00000164128, ENSG00000140931, ENSG00000005249, ENSG00000168412, ENSG00000152192, ENSG00000112164, ENSG00000174775, ENSG0000…	928	469	13528	1.30546	1	0.740418	69.723
GOTERM_BP_FAT	GO:0014706~striated muscle tissue development	14	1.10323	0.0636422	ENSG00000187957, ENSG00000169946, ENSG00000077092, ENSG00000078618, ENSG00000197321, ENSG00000163217, ENSG00000138814, ENSG00000069702, ENSG00000107404, ENSG00000198947, ENSG00000070748, ENSG00000133392, ENSG00000141385, ENSG00000143632	928	119	13528	1.71501	1	0.73832	69.7332
GOTERM_BP_FAT	GO:0019941~modification-dependent protein catabolic process	50	3.94011	0.0638295	ENSG00000105879, ENSG00000145416, ENSG00000103264, ENSG00000178974, ENSG00000167671, ENSG00000074319, ENSG00000131653, ENSG00000164109, ENSG00000118503, ENSG00000159069, ENSG00000147475, ENSG00000145390, ENSG00000107872, ENSG00000123124, ENSG00000134758, ENSG00000174010, ENSG00000078304, ENSG00000185104, ENSG00000007944, ENSG00000138134, ENSG00000170142, ENSG00000197530, ENSG00000085982, ENSG0000…	928	574	13528	1.26982	1	0.7372	69.8431
GOTERM_BP_FAT	GO:0043632~modification-dependent macromolecule catabolic process	50	3.94011	0.0638295	ENSG00000105879, ENSG00000145416, ENSG00000103264, ENSG00000178974, ENSG00000167671, ENSG00000074319, ENSG00000131653, ENSG00000164109, ENSG00000118503, ENSG00000159069, ENSG00000147475, ENSG00000145390, ENSG00000107872, ENSG00000123124, ENSG00000134758, ENSG00000174010, ENSG00000078304, ENSG00000185104, ENSG00000007944, ENSG00000138134, ENSG00000170142, ENSG00000197530, ENSG00000085982, ENSG0000…	928	574	13528	1.26982	1	0.7372	69.8431
GOTERM_BP_FAT	GO:0010558~negative regulation of macromolecule biosynthetic process	48	3.78251	0.0641232	ENSG00000198081, ENSG00000142655, ENSG00000169946, ENSG00000138795, ENSG00000182521, ENSG00000083168, ENSG00000166949, ENSG00000172059, ENSG00000159692, ENSG00000187840, ENSG00000167513, ENSG00000124788, ENSG00000151090, ENSG00000074319, ENSG00000159263, ENSG00000060138, ENSG00000074266, ENSG00000141543, ENSG00000129654, ENSG00000122691, ENSG00000142784, ENSG00000112033, ENSG00000077092, ENSG0000…	928	547	13528	1.2792	1	0.736691	70.0146
GOTERM_BP_FAT	GO:0070167~regulation of biomineral formation	6	0.472813	0.0645457	ENSG00000118972, ENSG00000138696, ENSG00000166949, ENSG00000204217, ENSG00000107779, ENSG00000125398	928	32	13528	2.7333	1	0.736915	70.2596
GOTERM_BP_FAT	GO:0048193~Golgi vesicle transport	15	1.18203	0.0646796	ENSG00000119787, ENSG00000079950, ENSG00000087502, ENSG00000109686, ENSG00000107862, ENSG00000168818, ENSG00000047579, ENSG00000101310, ENSG00000124333, ENSG00000021574, ENSG00000164597, ENSG00000166685, ENSG00000168434, ENSG00000138674, ENSG00000100934	928	131	13528	1.66919	1	0.735519	70.3369
GOTERM_BP_FAT	GO:0031327~negative regulation of cellular biosynthetic process	49	3.86131	0.0647749	ENSG00000198081, ENSG00000142655, ENSG00000169946, ENSG00000138795, ENSG00000182521, ENSG00000083168, ENSG00000166949, ENSG00000172059, ENSG00000159692, ENSG00000187840, ENSG00000167513, ENSG00000124788, ENSG00000151090, ENSG00000159263, ENSG00000074319, ENSG00000060138, ENSG00000074266, ENSG00000141543, ENSG00000129654, ENSG00000122691, ENSG00000142784, ENSG00000112033, ENSG00000077092, ENSG0000…	928	561	13528	1.27327	1	0.733915	70.3918
GOTERM_BP_FAT	GO:0006586~indolalkylamine metabolic process	4	0.315209	0.0661895	ENSG00000151790, ENSG00000183454, ENSG00000129673, ENSG00000129167	928	14	13528	4.16502	1	0.739645	71.1953
GOTERM_BP_FAT	GO:0035265~organ growth	4	0.315209	0.0661895	ENSG00000163217, ENSG00000069702, ENSG00000171791, ENSG00000179295	928	14	13528	4.16502	1	0.739645	71.1953
GOTERM_BP_FAT	GO:0042430~indole and derivative metabolic process	4	0.315209	0.0661895	ENSG00000151790, ENSG00000183454, ENSG00000129673, ENSG00000129167	928	14	13528	4.16502	1	0.739645	71.1953
GOTERM_BP_FAT	GO:0042434~indole derivative metabolic process	4	0.315209	0.0661895	ENSG00000151790, ENSG00000183454, ENSG00000129673, ENSG00000129167	928	14	13528	4.16502	1	0.739645	71.1953
GOTERM_BP_FAT	GO:0009628~response to abiotic stimulus	34	2.67928	0.0678264	ENSG00000181026, ENSG00000163161, ENSG00000165806, ENSG00000008710, ENSG00000122375, ENSG00000177606, ENSG00000171791, ENSG00000124788, ENSG00000111728, ENSG00000078808, ENSG00000183454, ENSG00000060138, ENSG00000174775, ENSG00000166148, ENSG00000168398, ENSG00000103489, ENSG00000151067, ENSG00000115353, ENSG00000164342, ENSG00000133703, ENSG00000169836, ENSG00000121361, ENSG00000148604, ENSG0000…	928	368	13528	1.34684	1	0.74638	72.0993
GOTERM_BP_FAT	GO:0032446~protein modification by small protein conjugation	15	1.18203	0.0680221	ENSG00000105879, ENSG00000009335, ENSG00000119401, ENSG00000109670, ENSG00000123124, ENSG00000123091, ENSG00000122257, ENSG00000137393, ENSG00000007944, ENSG00000142208, ENSG00000170142, ENSG00000197530, ENSG00000130939, ENSG00000074319, ENSG00000131653	928	132	13528	1.65654	1	0.745341	72.2055
GOTERM_BP_FAT	GO:0048729~tissue morphogenesis	19	1.49724	0.0681782	ENSG00000165731, ENSG00000138795, ENSG00000122691, ENSG00000166949, ENSG00000184207, ENSG00000107779, ENSG00000170365, ENSG00000163217, ENSG00000143013, ENSG00000069702, ENSG00000171791, ENSG00000104267, ENSG00000204217, ENSG00000075891, ENSG00000184916, ENSG00000125850, ENSG00000164692, ENSG00000137203, ENSG00000142867	928	180	13528	1.53875	1	0.7441	72.29
GOTERM_BP_FAT	GO:0017156~calcium ion-dependent exocytosis	5	0.394011	0.0684619	ENSG00000151067, ENSG00000109738, ENSG00000078808, ENSG00000106089, ENSG00000124333	928	23	13528	3.16904	1	0.743543	72.4429
GOTERM_BP_FAT	GO:0009154~purine ribonucleotide catabolic process	5	0.394011	0.0684619	ENSG00000091262, ENSG00000138185, ENSG00000163161, ENSG00000119541, ENSG00000131979	928	23	13528	3.16904	1	0.743543	72.4429
GOTERM_BP_FAT	GO:0016044~membrane organization	35	2.75808	0.0689544	ENSG00000080824, ENSG00000079950, ENSG00000134569, ENSG00000187957, ENSG00000109686, ENSG00000107862, ENSG00000157077, ENSG00000070018, ENSG00000147650, ENSG00000140022, ENSG00000171365, ENSG00000136717, ENSG00000140545, ENSG00000171791, ENSG00000003056, ENSG00000047249, ENSG00000136854, ENSG00000138674, ENSG00000010278, ENSG00000174775, ENSG00000130270, ENSG00000118308, ENSG00000120251, ENSG0000…	928	381	13528	1.33915	1	0.744089	72.7065
GOTERM_BP_FAT	GO:0055065~metal ion homeostasis	21	1.65485	0.0697019	ENSG00000166148, ENSG00000180210, ENSG00000182687, ENSG00000168398, ENSG00000151067, ENSG00000100373, ENSG00000107562, ENSG00000100739, ENSG00000183023, ENSG00000115353, ENSG00000151623, ENSG00000221978, ENSG00000144481, ENSG00000171517, ENSG00000164418, ENSG00000151617, ENSG00000171791, ENSG00000154118, ENSG00000166501, ENSG00000164128, ENSG00000112164	928	205	13528	1.49331	1	0.745952	73.102
GOTERM_BP_FAT	GO:0048167~regulation of synaptic plasticity	9	0.70922	0.0698384	ENSG00000104368, ENSG00000164418, ENSG00000147465, ENSG00000156642, ENSG00000133703, ENSG00000169862, ENSG00000128245, ENSG00000183454, ENSG00000174775	928	64	13528	2.04997	1	0.74464	73.1737
GOTERM_BP_FAT	GO:0051173~positive regulation of nitrogen compound metabolic process	55	4.33412	0.0701649	ENSG00000169946, ENSG00000138795, ENSG00000185024, ENSG00000083635, ENSG00000110768, ENSG00000153879, ENSG00000124788, ENSG00000172379, ENSG00000198791, ENSG00000135373, ENSG00000116044, ENSG00000087494, ENSG00000197905, ENSG00000125398, ENSG00000185652, ENSG00000187735, ENSG00000151615, ENSG00000067082, ENSG00000065970, ENSG00000142208, ENSG00000075891, ENSG00000125850, ENSG00000170577, ENSG0000…	928	644	13528	1.24498	1	0.744317	73.3443
GOTERM_BP_FAT	GO:0046907~intracellular transport	56	4.41292	0.0702211	ENSG00000079950, ENSG00000119787, ENSG00000109686, ENSG00000107862, ENSG00000115306, ENSG00000157077, ENSG00000157538, ENSG00000124788, ENSG00000054523, ENSG00000070718, ENSG00000103365, ENSG00000158560, ENSG00000164144, ENSG00000087502, ENSG00000168818, ENSG00000075790, ENSG00000119541, ENSG00000164418, ENSG00000138814, ENSG00000142208, ENSG00000100300, ENSG00000086065, ENSG00000158195, ENSG0000…	928	657	13528	1.24253	1	0.742607	73.3736
GOTERM_BP_FAT	GO:0007409~axonogenesis	20	1.57604	0.0704708	ENSG00000151150, ENSG00000179295, ENSG00000138696, ENSG00000107562, ENSG00000182168, ENSG00000185008, ENSG00000170927, ENSG00000185652, ENSG00000116957, ENSG00000151615, ENSG00000075213, ENSG00000171791, ENSG00000159674, ENSG00000165300, ENSG00000075891, ENSG00000136854, ENSG00000140443, ENSG00000112333, ENSG00000152192, ENSG00000141385	928	193	13528	1.51063	1	0.741902	73.5033
GOTERM_BP_FAT	GO:0051101~regulation of DNA binding	14	1.10323	0.0707276	ENSG00000142655, ENSG00000104365, ENSG00000087494, ENSG00000164342, ENSG00000133703, ENSG00000107223, ENSG00000153879, ENSG00000184990, ENSG00000069702, ENSG00000137504, ENSG00000121691, ENSG00000129654, ENSG00000142867, ENSG00000165672	928	121	13528	1.68666	1	0.741241	73.636
GOTERM_BP_FAT	GO:0045667~regulation of osteoblast differentiation	7	0.551615	0.0711888	ENSG00000188064, ENSG00000118972, ENSG00000138696, ENSG00000166949, ENSG00000204217, ENSG00000107779, ENSG00000170365	928	43	13528	2.3731	1	0.741629	73.8727
GOTERM_BP_FAT	GO:0051247~positive regulation of protein metabolic process	24	1.89125	0.0718222	ENSG00000180210, ENSG00000118971, ENSG00000119401, ENSG00000109686, ENSG00000107779, ENSG00000020577, ENSG00000112742, ENSG00000167965, ENSG00000175756, ENSG00000078618, ENSG00000188906, ENSG00000163217, ENSG00000170312, ENSG00000151617, ENSG00000171791, ENSG00000142208, ENSG00000170142, ENSG00000102471, ENSG00000204217, ENSG00000168615, ENSG00000151694, ENSG00000166851, ENSG00000142867, ENSG0000…	928	243	13528	1.43976	1	0.742885	74.1947
GOTERM_BP_FAT	GO:0006195~purine nucleotide catabolic process	6	0.472813	0.0719773	ENSG00000091262, ENSG00000138185, ENSG00000138735, ENSG00000163161, ENSG00000119541, ENSG00000131979	928	33	13528	2.65047	1	0.741721	74.273
GOTERM_BP_FAT	GO:0006939~smooth muscle contraction	6	0.472813	0.0719773	ENSG00000151617, ENSG00000168398, ENSG00000151067, ENSG00000115353, ENSG00000180616, ENSG00000133392	928	33	13528	2.65047	1	0.741721	74.273
GOTERM_BP_FAT	GO:0050801~ion homeostasis	37	2.91568	0.0725312	ENSG00000118972, ENSG00000182687, ENSG00000180210, ENSG00000107562, ENSG00000183023, ENSG00000109738, ENSG00000221978, ENSG00000171517, ENSG00000177606, ENSG00000171791, ENSG00000154118, ENSG00000124788, ENSG00000047249, ENSG00000166501, ENSG00000183454, ENSG00000164128, ENSG00000010278, ENSG00000112164, ENSG00000166148, ENSG00000168398, ENSG00000091137, ENSG00000100373, ENSG00000151067, ENSG0000…	928	409	13528	1.31875	1	0.742567	74.5506
GOTERM_BP_FAT	GO:0007204~elevation of cytosolic calcium ion concentration	13	1.02443	0.0733524	ENSG00000166148, ENSG00000180210, ENSG00000151617, ENSG00000182687, ENSG00000168398, ENSG00000154118, ENSG00000151067, ENSG00000100739, ENSG00000183023, ENSG00000115353, ENSG00000221978, ENSG00000112164, ENSG00000171517	928	110	13528	1.72281	1	0.744725	74.9571
GOTERM_BP_FAT	GO:0006357~regulation of transcription from RNA polymerase II promoter	61	4.80693	0.0737852	ENSG00000169946, ENSG00000138795, ENSG00000151923, ENSG00000083635, ENSG00000110768, ENSG00000130675, ENSG00000159692, ENSG00000153879, ENSG00000124788, ENSG00000159263, ENSG00000060138, ENSG00000172379, ENSG00000152192, ENSG00000198791, ENSG00000142784, ENSG00000205922, ENSG00000197905, ENSG00000125398, ENSG00000185652, ENSG00000187735, ENSG00000151615, ENSG00000067082, ENSG00000075891, ENSG0000…	928	727	13528	1.22315	1	0.744946	75.1688
GOTERM_BP_FAT	GO:0042476~odontogenesis	8	0.630418	0.0742195	ENSG00000138795, ENSG00000104267, ENSG00000184916, ENSG00000184207, ENSG00000107779, ENSG00000164692, ENSG00000186197, ENSG00000091136	928	54	13528	2.15964	1	0.745173	75.3795
GOTERM_BP_FAT	GO:0032989~cellular component morphogenesis	36	2.83688	0.0743301	ENSG00000138795, ENSG00000151150, ENSG00000138696, ENSG00000171595, ENSG00000107562, ENSG00000182168, ENSG00000131196, ENSG00000163217, ENSG00000029534, ENSG00000198752, ENSG00000171791, ENSG00000159674, ENSG00000136854, ENSG00000140443, ENSG00000129654, ENSG00000133392, ENSG00000010278, ENSG00000152192, ENSG00000091136, ENSG00000179295, ENSG00000100373, ENSG00000185008, ENSG00000170927, ENSG0000…	928	397	13528	1.3219	1	0.743823	75.4329
GOTERM_BP_FAT	GO:0051240~positive regulation of multicellular organismal process	24	1.89125	0.0744137	ENSG00000166148, ENSG00000180210, ENSG00000138696, ENSG00000120251, ENSG00000166949, ENSG00000115353, ENSG00000164342, ENSG00000169836, ENSG00000107779, ENSG00000196664, ENSG00000163217, ENSG00000164418, ENSG00000132664, ENSG00000171791, ENSG00000104267, ENSG00000142208, ENSG00000188778, ENSG00000204217, ENSG00000165409, ENSG00000151694, ENSG00000164128, ENSG00000142867, ENSG00000176170, ENSG0000…	928	244	13528	1.43386	1	0.742349	75.4732
GOTERM_BP_FAT	GO:0045944~positive regulation of transcription from RNA polymerase II promoter	34	2.67928	0.0744526	ENSG00000169946, ENSG00000138795, ENSG00000166949, ENSG00000163161, ENSG00000110768, ENSG00000083635, ENSG00000170365, ENSG00000177606, ENSG00000071564, ENSG00000124788, ENSG00000125820, ENSG00000151090, ENSG00000172379, ENSG00000198791, ENSG00000119614, ENSG00000077092, ENSG00000134532, ENSG00000188342, ENSG00000138083, ENSG00000197905, ENSG00000005513, ENSG00000125398, ENSG00000177565, ENSG0000…	928	371	13528	1.33595	1	0.740664	75.492
GOTERM_BP_FAT	GO:0042391~regulation of membrane potential	15	1.18203	0.0750452	ENSG00000112033, ENSG00000115353, ENSG00000109738, ENSG00000185652, ENSG00000164418, ENSG00000138814, ENSG00000177606, ENSG00000171791, ENSG00000124788, ENSG00000128242, ENSG00000183454, ENSG00000091140, ENSG00000010278, ENSG00000141385, ENSG00000165672	928	134	13528	1.63182	1	0.741682	75.7756
GOTERM_BP_FAT	GO:0001666~response to hypoxia	15	1.18203	0.0750452	ENSG00000104368, ENSG00000166949, ENSG00000183023, ENSG00000138735, ENSG00000163161, ENSG00000166828, ENSG00000151617, ENSG00000186951, ENSG00000171791, ENSG00000184916, ENSG00000168447, ENSG00000109610, ENSG00000151694, ENSG00000102755, ENSG00000172379	928	134	13528	1.63182	1	0.741682	75.7756
GOTERM_BP_FAT	GO:0048858~cell projection morphogenesis	24	1.89125	0.0770681	ENSG00000151150, ENSG00000138696, ENSG00000171595, ENSG00000179295, ENSG00000107562, ENSG00000182168, ENSG00000185008, ENSG00000170927, ENSG00000185652, ENSG00000116957, ENSG00000151615, ENSG00000075213, ENSG00000171791, ENSG00000159674, ENSG00000107404, ENSG00000165300, ENSG00000198947, ENSG00000075891, ENSG00000136854, ENSG00000140443, ENSG00000112333, ENSG00000129654, ENSG00000152192, ENSG0000…	928	245	13528	1.42801	1	0.749473	76.7206
GOTERM_BP_FAT	GO:0040007~growth	19	1.49724	0.0772064	ENSG00000138696, ENSG00000179295, ENSG00000112033, ENSG00000142784, ENSG00000077782, ENSG00000116957, ENSG00000151615, ENSG00000163217, ENSG00000101003, ENSG00000069702, ENSG00000171791, ENSG00000142208, ENSG00000198964, ENSG00000147548, ENSG00000078579, ENSG00000088930, ENSG00000198783, ENSG00000131669, ENSG00000143632	928	183	13528	1.51352	1	0.74829	76.7839
GOTERM_BP_FAT	GO:0006874~cellular calcium ion homeostasis	19	1.49724	0.0772064	ENSG00000166148, ENSG00000180210, ENSG00000182687, ENSG00000168398, ENSG00000151067, ENSG00000107562, ENSG00000100739, ENSG00000115353, ENSG00000183023, ENSG00000221978, ENSG00000144481, ENSG00000171517, ENSG00000164418, ENSG00000151617, ENSG00000171791, ENSG00000154118, ENSG00000166501, ENSG00000164128, ENSG00000112164	928	183	13528	1.51352	1	0.74829	76.7839
GOTERM_BP_FAT	GO:0046395~carboxylic acid catabolic process	13	1.02443	0.0773864	ENSG00000079931, ENSG00000151790, ENSG00000112033, ENSG00000060982, ENSG00000171503, ENSG00000100577, ENSG00000119711, ENSG00000103876, ENSG00000164039, ENSG00000161533, ENSG00000125821, ENSG00000153904, ENSG00000157184	928	111	13528	1.70728	1	0.747309	76.8661
GOTERM_BP_FAT	GO:0016054~organic acid catabolic process	13	1.02443	0.0773864	ENSG00000079931, ENSG00000151790, ENSG00000112033, ENSG00000060982, ENSG00000171503, ENSG00000100577, ENSG00000119711, ENSG00000103876, ENSG00000164039, ENSG00000161533, ENSG00000125821, ENSG00000153904, ENSG00000157184	928	111	13528	1.70728	1	0.747309	76.8661
GOTERM_BP_FAT	GO:0032012~regulation of ARF protein signal transduction	7	0.551615	0.0778898	ENSG00000059915, ENSG00000107862, ENSG00000112379, ENSG00000131584, ENSG00000151693, ENSG00000112305, ENSG00000153317	928	44	13528	2.31916	1	0.747841	77.0944
GOTERM_BP_FAT	GO:0009143~nucleoside triphosphate catabolic process	5	0.394011	0.0778923	ENSG00000091262, ENSG00000138185, ENSG00000163161, ENSG00000119541, ENSG00000131979	928	24	13528	3.037	1	0.746046	77.0956
GOTERM_BP_FAT	GO:0045778~positive regulation of ossification	5	0.394011	0.0778923	ENSG00000138696, ENSG00000166949, ENSG00000204217, ENSG00000151090, ENSG00000107779	928	24	13528	3.037	1	0.746046	77.0956
GOTERM_BP_FAT	GO:0046653~tetrahydrofolate metabolic process	3	0.236407	0.0782322	ENSG00000065911, ENSG00000116984, ENSG00000131979	928	7	13528	6.24754	1	0.745826	77.2485
GOTERM_BP_FAT	GO:0010889~regulation of sequestering of triglyceride	3	0.236407	0.0782322	ENSG00000176194, ENSG00000186951, ENSG00000177666	928	7	13528	6.24754	1	0.745826	77.2485
GOTERM_BP_FAT	GO:0032270~positive regulation of cellular protein metabolic process	23	1.81245	0.0785105	ENSG00000180210, ENSG00000118971, ENSG00000109686, ENSG00000107779, ENSG00000020577, ENSG00000112742, ENSG00000167965, ENSG00000175756, ENSG00000078618, ENSG00000188906, ENSG00000163217, ENSG00000170312, ENSG00000151617, ENSG00000171791, ENSG00000142208, ENSG00000170142, ENSG00000102471, ENSG00000204217, ENSG00000168615, ENSG00000151694, ENSG00000166851, ENSG00000142867, ENSG00000164162	928	233	13528	1.43899	1	0.745324	77.373
GOTERM_BP_FAT	GO:0006875~cellular metal ion homeostasis	20	1.57604	0.0793722	ENSG00000166148, ENSG00000180210, ENSG00000182687, ENSG00000168398, ENSG00000151067, ENSG00000107562, ENSG00000100739, ENSG00000183023, ENSG00000115353, ENSG00000151623, ENSG00000221978, ENSG00000144481, ENSG00000171517, ENSG00000164418, ENSG00000151617, ENSG00000171791, ENSG00000154118, ENSG00000166501, ENSG00000164128, ENSG00000112164	928	196	13528	1.48751	1	0.747503	77.7545
GOTERM_BP_FAT	GO:0017157~regulation of exocytosis	6	0.472813	0.0798563	ENSG00000169213, ENSG00000092929, ENSG00000136854, ENSG00000131653, ENSG00000167964, ENSG00000106089	928	34	13528	2.57252	1	0.747937	77.9661
GOTERM_BP_FAT	GO:0019229~regulation of vasoconstriction	6	0.472813	0.0798563	ENSG00000166148, ENSG00000168398, ENSG00000151067, ENSG00000115353, ENSG00000204217, ENSG00000164128	928	34	13528	2.57252	1	0.747937	77.9661
GOTERM_BP_FAT	GO:0009968~negative regulation of signal transduction	22	1.73365	0.0799075	ENSG00000091844, ENSG00000177425, ENSG00000138083, ENSG00000070018, ENSG00000115290, ENSG00000106927, ENSG00000176194, ENSG00000147509, ENSG00000142208, ENSG00000188778, ENSG00000078246, ENSG00000180008, ENSG00000124788, ENSG00000165233, ENSG00000164619, ENSG00000125850, ENSG00000089234, ENSG00000155011, ENSG00000170677, ENSG00000118503, ENSG00000164161, ENSG00000148908	928	221	13528	1.45116	1	0.74641	77.9884
GOTERM_BP_FAT	GO:0032868~response to insulin stimulus	12	0.945626	0.0801908	ENSG00000147465, ENSG00000186951, ENSG00000146247, ENSG00000118971, ENSG00000142208, ENSG00000142784, ENSG00000185950, ENSG00000140443, ENSG00000109458, ENSG00000129673, ENSG00000048052, ENSG00000187840	928	100	13528	1.74931	1	0.745941	78.1113
GOTERM_BP_FAT	GO:0007190~activation of adenylate cyclase activity	8	0.630418	0.0802754	ENSG00000112038, ENSG00000151617, ENSG00000182687, ENSG00000188778, ENSG00000155897, ENSG00000087494, ENSG00000165409, ENSG00000112164	928	55	13528	2.12038	1	0.744578	78.1478
GOTERM_BP_FAT	GO:0060538~skeletal muscle organ development	9	0.70922	0.0806016	ENSG00000138814, ENSG00000187957, ENSG00000107404, ENSG00000198947, ENSG00000070748, ENSG00000078618, ENSG00000197321, ENSG00000143632, ENSG00000141385	928	66	13528	1.98785	1	0.744314	78.2883
GOTERM_BP_FAT	GO:0007519~skeletal muscle tissue development	9	0.70922	0.0806016	ENSG00000138814, ENSG00000187957, ENSG00000107404, ENSG00000198947, ENSG00000070748, ENSG00000078618, ENSG00000197321, ENSG00000143632, ENSG00000141385	928	66	13528	1.98785	1	0.744314	78.2883
GOTERM_BP_FAT	GO:0048667~cell morphogenesis involved in neuron differentiation	21	1.65485	0.0812432	ENSG00000151150, ENSG00000138696, ENSG00000179295, ENSG00000107562, ENSG00000182168, ENSG00000185008, ENSG00000170927, ENSG00000185652, ENSG00000116957, ENSG00000151615, ENSG00000075213, ENSG00000171791, ENSG00000159674, ENSG00000107404, ENSG00000165300, ENSG00000075891, ENSG00000136854, ENSG00000140443, ENSG00000112333, ENSG00000152192, ENSG00000141385	928	209	13528	1.46473	1	0.745467	78.562
GOTERM_BP_FAT	GO:0019216~regulation of lipid metabolic process	13	1.02443	0.0815587	ENSG00000166148, ENSG00000147465, ENSG00000142784, ENSG00000185950, ENSG00000107223, ENSG00000176194, ENSG00000186951, ENSG00000142208, ENSG00000177666, ENSG00000151090, ENSG00000009950, ENSG00000109320, ENSG00000157184	928	112	13528	1.69204	1	0.745156	78.6954
GOTERM_BP_FAT	GO:0019725~cellular homeostasis	41	3.23089	0.0821002	ENSG00000118972, ENSG00000182687, ENSG00000180210, ENSG00000107562, ENSG00000183023, ENSG00000109738, ENSG00000221978, ENSG00000123131, ENSG00000171517, ENSG00000166479, ENSG00000177606, ENSG00000171791, ENSG00000154118, ENSG00000124788, ENSG00000047249, ENSG00000166501, ENSG00000183454, ENSG00000164128, ENSG00000117862, ENSG00000010278, ENSG00000112164, ENSG00000166148, ENSG00000168398, ENSG0000…	928	466	13528	1.28258	1	0.745851	78.9226
GOTERM_BP_FAT	GO:0042127~regulation of cell proliferation	65	5.12214	0.0821228	ENSG00000107779, ENSG00000105835, ENSG00000155508, ENSG00000159692, ENSG00000204217, ENSG00000074319, ENSG00000172379, ENSG00000176170, ENSG00000091136, ENSG00000166148, ENSG00000168398, ENSG00000087494, ENSG00000115353, ENSG00000112742, ENSG00000125398, ENSG00000151617, ENSG00000069702, ENSG00000143196, ENSG00000134259, ENSG00000125850, ENSG00000165409, ENSG00000141655, ENSG00000137764, ENSG0000…	928	787	13528	1.20399	1	0.744247	78.932
GOTERM_BP_FAT	GO:0065003~macromolecular complex assembly	56	4.41292	0.0831954	ENSG00000119787, ENSG00000185024, ENSG00000182521, ENSG00000072080, ENSG00000109738, ENSG00000083635, ENSG00000026103, ENSG00000157077, ENSG00000110768, ENSG00000138758, ENSG00000082516, ENSG00000167670, ENSG00000077522, ENSG00000122545, ENSG00000151276, ENSG00000104221, ENSG00000153721, ENSG00000165417, ENSG00000110799, ENSG00000144481, ENSG00000164418, ENSG00000171867, ENSG00000153207, ENSG0000…	928	665	13528	1.22759	1	0.747271	79.375
GOTERM_BP_FAT	GO:0043085~positive regulation of catalytic activity	45	3.5461	0.0849827	ENSG00000118972, ENSG00000182687, ENSG00000180210, ENSG00000118971, ENSG00000166949, ENSG00000155897, ENSG00000109458, ENSG00000171517, ENSG00000170312, ENSG00000184990, ENSG00000145431, ENSG00000171791, ENSG00000181634, ENSG00000143674, ENSG00000142875, ENSG00000109270, ENSG00000168615, ENSG00000151694, ENSG00000131653, ENSG00000005249, ENSG00000129654, ENSG00000166851, ENSG00000112164, ENSG0000…	928	520	13528	1.26152	1	0.753291	80.0936
GOTERM_BP_FAT	GO:0009890~negative regulation of biosynthetic process	49	3.86131	0.0850111	ENSG00000198081, ENSG00000142655, ENSG00000169946, ENSG00000138795, ENSG00000182521, ENSG00000083168, ENSG00000166949, ENSG00000172059, ENSG00000159692, ENSG00000187840, ENSG00000167513, ENSG00000124788, ENSG00000151090, ENSG00000159263, ENSG00000074319, ENSG00000060138, ENSG00000074266, ENSG00000141543, ENSG00000129654, ENSG00000122691, ENSG00000142784, ENSG00000112033, ENSG00000077092, ENSG0000…	928	573	13528	1.2466	1	0.751746	80.1048
GOTERM_BP_FAT	GO:0060537~muscle tissue development	14	1.10323	0.0863922	ENSG00000187957, ENSG00000169946, ENSG00000077092, ENSG00000078618, ENSG00000197321, ENSG00000163217, ENSG00000138814, ENSG00000069702, ENSG00000107404, ENSG00000198947, ENSG00000070748, ENSG00000133392, ENSG00000141385, ENSG00000143632	928	125	13528	1.63269	1	0.755909	80.6436
GOTERM_BP_FAT	GO:0045762~positive regulation of adenylate cyclase activity	8	0.630418	0.0866086	ENSG00000112038, ENSG00000151617, ENSG00000182687, ENSG00000188778, ENSG00000155897, ENSG00000087494, ENSG00000165409, ENSG00000112164	928	56	13528	2.08251	1	0.755167	80.7268
GOTERM_BP_FAT	GO:0030097~hemopoiesis	23	1.81245	0.0871999	ENSG00000111252, ENSG00000083168, ENSG00000076554, ENSG00000026103, ENSG00000129691, ENSG00000048052, ENSG00000153879, ENSG00000187735, ENSG00000067082, ENSG00000069702, ENSG00000071564, ENSG00000171791, ENSG00000164935, ENSG00000184916, ENSG00000159216, ENSG00000165409, ENSG00000169508, ENSG00000124391, ENSG00000081087, ENSG00000151694, ENSG00000119866, ENSG00000111732, ENSG00000165672	928	236	13528	1.4207	1	0.755983	80.9523
GOTERM_BP_FAT	GO:0045669~positive regulation of osteoblast differentiation	5	0.394011	0.0879333	ENSG00000188064, ENSG00000138696, ENSG00000204217, ENSG00000107779, ENSG00000170365	928	25	13528	2.91552	1	0.757374	81.2285
GOTERM_BP_FAT	GO:0043331~response to dsRNA	5	0.394011	0.0879333	ENSG00000166949, ENSG00000164342, ENSG00000121361, ENSG00000170365, ENSG00000134744	928	25	13528	2.91552	1	0.757374	81.2285
GOTERM_BP_FAT	GO:0045862~positive regulation of proteolysis	5	0.394011	0.0879333	ENSG00000142208, ENSG00000109686, ENSG00000168615, ENSG00000175756, ENSG00000078618	928	25	13528	2.91552	1	0.757374	81.2285
GOTERM_BP_FAT	GO:0001657~ureteric bud development	6	0.472813	0.0881756	ENSG00000165731, ENSG00000171791, ENSG00000077092, ENSG00000075891, ENSG00000185008, ENSG00000164056	928	35	13528	2.49901	1	0.756747	81.3189
GOTERM_BP_FAT	GO:0043933~macromolecular complex subunit organization	59	4.64933	0.0901813	ENSG00000119787, ENSG00000185024, ENSG00000182521, ENSG00000072080, ENSG00000109738, ENSG00000083635, ENSG00000026103, ENSG00000157077, ENSG00000110768, ENSG00000138758, ENSG00000082516, ENSG00000167670, ENSG00000077522, ENSG00000122545, ENSG00000088930, ENSG00000151276, ENSG00000116830, ENSG00000104221, ENSG00000153721, ENSG00000165417, ENSG00000110799, ENSG00000144481, ENSG00000164418, ENSG0000…	928	710	13528	1.21138	1	0.763218	82.0518
GOTERM_BP_FAT	GO:0032880~regulation of protein localization	15	1.18203	0.0904633	ENSG00000091137, ENSG00000179295, ENSG00000166949, ENSG00000107779, ENSG00000182985, ENSG00000176194, ENSG00000185104, ENSG00000171791, ENSG00000142208, ENSG00000181634, ENSG00000102471, ENSG00000168615, ENSG00000129158, ENSG00000198765, ENSG00000164144	928	138	13528	1.58452	1	0.762744	82.1527
GOTERM_BP_FAT	GO:0009416~response to light stimulus	15	1.18203	0.0904633	ENSG00000151067, ENSG00000133703, ENSG00000163161, ENSG00000165806, ENSG00000148604, ENSG00000138741, ENSG00000122375, ENSG00000171791, ENSG00000142208, ENSG00000124788, ENSG00000183454, ENSG00000078808, ENSG00000130939, ENSG00000121691, ENSG00000174775	928	138	13528	1.58452	1	0.762744	82.1527
GOTERM_BP_FAT	GO:0006200~ATP catabolic process	4	0.315209	0.0920915	ENSG00000091262, ENSG00000138185, ENSG00000163161, ENSG00000119541	928	16	13528	3.6444	1	0.767535	82.7245
GOTERM_BP_FAT	GO:0019079~viral genome replication	4	0.315209	0.0920915	ENSG00000162599, ENSG00000124795, ENSG00000082556, ENSG00000159692	928	16	13528	3.6444	1	0.767535	82.7245
GOTERM_BP_FAT	GO:0043038~amino acid activation	7	0.551615	0.0923166	ENSG00000145982, ENSG00000125821, ENSG00000164022, ENSG00000103356, ENSG00000140105, ENSG00000106105, ENSG00000116874	928	46	13528	2.21833	1	0.766837	82.8022
GOTERM_BP_FAT	GO:0043039~tRNA aminoacylation	7	0.551615	0.0923166	ENSG00000145982, ENSG00000125821, ENSG00000164022, ENSG00000103356, ENSG00000140105, ENSG00000106105, ENSG00000116874	928	46	13528	2.21833	1	0.766837	82.8022
GOTERM_BP_FAT	GO:0006418~tRNA aminoacylation for protein translation	7	0.551615	0.0923166	ENSG00000145982, ENSG00000125821, ENSG00000164022, ENSG00000103356, ENSG00000140105, ENSG00000106105, ENSG00000116874	928	46	13528	2.21833	1	0.766837	82.8022
GOTERM_BP_FAT	GO:0016477~cell migration	26	2.04886	0.0931704	ENSG00000104368, ENSG00000165731, ENSG00000187957, ENSG00000122691, ENSG00000140945, ENSG00000107562, ENSG00000112033, ENSG00000164022, ENSG00000185532, ENSG00000172349, ENSG00000170370, ENSG00000070018, ENSG00000078618, ENSG00000166828, ENSG00000069702, ENSG00000158195, ENSG00000119185, ENSG00000125850, ENSG00000118523, ENSG00000168447, ENSG00000151694, ENSG00000112333, ENSG00000102755, ENSG0000…	928	276	13528	1.37325	1	0.768557	83.0938
GOTERM_BP_FAT	GO:0031281~positive regulation of cyclase activity	8	0.630418	0.0932175	ENSG00000112038, ENSG00000151617, ENSG00000182687, ENSG00000188778, ENSG00000155897, ENSG00000087494, ENSG00000165409, ENSG00000112164	928	57	13528	2.04598	1	0.767185	83.1098
GOTERM_BP_FAT	GO:0055074~calcium ion homeostasis	19	1.49724	0.0939483	ENSG00000166148, ENSG00000180210, ENSG00000182687, ENSG00000168398, ENSG00000151067, ENSG00000107562, ENSG00000100739, ENSG00000115353, ENSG00000183023, ENSG00000221978, ENSG00000144481, ENSG00000171517, ENSG00000164418, ENSG00000151617, ENSG00000171791, ENSG00000154118, ENSG00000166501, ENSG00000164128, ENSG00000112164	928	188	13528	1.47327	1	0.768423	83.3555
GOTERM_BP_FAT	GO:0035239~tube morphogenesis	14	1.10323	0.0949801	ENSG00000165731, ENSG00000122691, ENSG00000107562, ENSG00000143013, ENSG00000151617, ENSG00000171791, ENSG00000075891, ENSG00000125850, ENSG00000142871, ENSG00000137203, ENSG00000102755, ENSG00000142867, ENSG00000164532, ENSG00000134323	928	127	13528	1.60698	1	0.770773	83.6966
GOTERM_BP_FAT	GO:0030036~actin cytoskeleton organization	22	1.73365	0.0953578	ENSG00000079819, ENSG00000155849, ENSG00000133703, ENSG00000185532, ENSG00000177938, ENSG00000203485, ENSG00000082397, ENSG00000163217, ENSG00000125868, ENSG00000154553, ENSG00000198752, ENSG00000171791, ENSG00000143776, ENSG00000186654, ENSG00000158195, ENSG00000137460, ENSG00000147202, ENSG00000134775, ENSG00000129654, ENSG00000133392, ENSG00000174775, ENSG00000143632	928	226	13528	1.41906	1	0.770658	83.8198
GOTERM_BP_FAT	GO:0048878~chemical homeostasis	44	3.4673	0.0961016	ENSG00000118972, ENSG00000182687, ENSG00000180210, ENSG00000107562, ENSG00000183023, ENSG00000109738, ENSG00000185950, ENSG00000221978, ENSG00000171517, ENSG00000177606, ENSG00000171791, ENSG00000154118, ENSG00000124788, ENSG00000047249, ENSG00000166501, ENSG00000183454, ENSG00000164128, ENSG00000138823, ENSG00000010278, ENSG00000112164, ENSG00000166148, ENSG00000168398, ENSG00000091137, ENSG0000…	928	512	13528	1.25276	1	0.771899	84.0599
GOTERM_BP_FAT	GO:0043068~positive regulation of programmed cell death	38	2.99448	0.0963827	ENSG00000181026, ENSG00000166949, ENSG00000163161, ENSG00000151923, ENSG00000026103, ENSG00000153879, ENSG00000187288, ENSG00000188906, ENSG00000176194, ENSG00000184990, ENSG00000177606, ENSG00000171791, ENSG00000163947, ENSG00000183454, ENSG00000117862, ENSG00000152192, ENSG00000127191, ENSG00000127863, ENSG00000160049, ENSG00000077092, ENSG00000177425, ENSG00000169372, ENSG00000182985, ENSG0000…	928	433	13528	1.27933	1	0.771427	84.1498
GOTERM_BP_FAT	GO:0007205~activation of protein kinase C activity by G-protein coupled receptor protein signaling pathway	6	0.472813	0.0969265	ENSG00000151617, ENSG00000100739, ENSG00000115825, ENSG00000170927, ENSG00000100422, ENSG00000176170	928	36	13528	2.4296	1	0.771922	84.3222
GOTERM_BP_FAT	GO:0048168~regulation of neuronal synaptic plasticity	6	0.472813	0.0969265	ENSG00000164418, ENSG00000147465, ENSG00000156642, ENSG00000133703, ENSG00000183454, ENSG00000174775	928	36	13528	2.4296	1	0.771922	84.3222
GOTERM_BP_FAT	GO:0010720~positive regulation of cell development	9	0.70922	0.0984866	ENSG00000147465, ENSG00000171791, ENSG00000156642, ENSG00000134259, ENSG00000166949, ENSG00000185008, ENSG00000170365, ENSG00000115091, ENSG00000185652	928	69	13528	1.90142	1	0.776084	84.8072
GOTERM_BP_FAT	GO:0050994~regulation of lipid catabolic process	5	0.394011	0.0985635	ENSG00000176194, ENSG00000186951, ENSG00000142208, ENSG00000177666, ENSG00000185950	928	26	13528	2.80338	1	0.774879	84.8308
GOTERM_BP_FAT	GO:0033692~cellular polysaccharide biosynthetic process	5	0.394011	0.0985635	ENSG00000147408, ENSG00000142208, ENSG00000111713, ENSG00000119938, ENSG00000169826	928	26	13528	2.80338	1	0.774879	84.8308
GOTERM_BP_FAT	GO:0042311~vasodilation	5	0.394011	0.0985635	ENSG00000188778, ENSG00000138735, ENSG00000121361, ENSG00000131979, ENSG00000164116	928	26	13528	2.80338	1	0.774879	84.8308
GOTERM_BP_FAT	GO:0060429~epithelium development	22	1.73365	0.0986639	ENSG00000135373, ENSG00000165731, ENSG00000158669, ENSG00000122691, ENSG00000167880, ENSG00000100373, ENSG00000087494, ENSG00000184207, ENSG00000107223, ENSG00000114638, ENSG00000143013, ENSG00000177606, ENSG00000171791, ENSG00000159307, ENSG00000104267, ENSG00000075891, ENSG00000184916, ENSG00000125850, ENSG00000074319, ENSG00000168615, ENSG00000137203, ENSG00000142867	928	227	13528	1.41281	1	0.773763	84.8615
GOTERM_BP_FAT	GO:0002228~natural killer cell mediated immunity	3	0.236407	0.0996972	ENSG00000092929, ENSG00000143669, ENSG00000153879	928	8	13528	5.46659	1	0.77598	85.1738
GOTERM_BP_FAT	GO:0031998~regulation of fatty acid beta-oxidation	3	0.236407	0.0996972	ENSG00000186951, ENSG00000142208, ENSG00000185950	928	8	13528	5.46659	1	0.77598	85.1738
GOTERM_BP_FAT	GO:0007184~SMAD protein nuclear translocation	3	0.236407	0.0996972	ENSG00000177606, ENSG00000115306, ENSG00000157077	928	8	13528	5.46659	1	0.77598	85.1738
GOTERM_BP_FAT	GO:0007183~SMAD protein complex assembly	3	0.236407	0.0996972	ENSG00000166949, ENSG00000157077, ENSG00000170365	928	8	13528	5.46659	1	0.77598	85.1738
GOTERM_BP_FAT	GO:0042267~natural killer cell mediated cytotoxicity	3	0.236407	0.0996972	ENSG00000092929, ENSG00000143669, ENSG00000153879	928	8	13528	5.46659	1	0.77598	85.1738
GOTERM_BP_FAT	GO:0035313~wound healing, spreading of epidermal cells	3	0.236407	0.0996972	ENSG00000168447, ENSG00000151694, ENSG00000166828	928	8	13528	5.46659	1	0.77598	85.1738
GOTERM_BP_FAT	GO:0016601~Rac protein signal transduction	3	0.236407	0.0996972	ENSG00000140945, ENSG00000158195, ENSG00000155849	928	8	13528	5.46659	1	0.77598	85.1738
GOTERM_BP_FAT	GO:0045737~positive regulation of cyclin-dependent protein kinase activity	3	0.236407	0.0996972	ENSG00000118971, ENSG00000142208, ENSG00000151694	928	8	13528	5.46659	1	0.77598	85.1738
GOTERM_BP_FAT	GO:0007217~tachykinin receptor signaling pathway	3	0.236407	0.0996972	ENSG00000115353, ENSG00000169836, ENSG00000198873	928	8	13528	5.46659	1	0.77598	85.1738
GOTERM_BP_FAT	GO:0043094~cellular metabolic compound salvage	3	0.236407	0.0996972	ENSG00000198931, ENSG00000099256, ENSG00000145293	928	8	13528	5.46659	1	0.77598	85.1738
GOTERM_BP_FAT	GO:0045843~negative regulation of striated muscle development	3	0.236407	0.0996972	ENSG00000138795, ENSG00000122691, ENSG00000048052	928	8	13528	5.46659	1	0.77598	85.1738
Pathway:
Category	Term	Count	%	PValue	Genes	List Total	Pop Hits	Pop Total	Fold Enrichment	Bonferroni	Benjamini	FDR
KEGG_PATHWAY	hsa04662:B cell receptor signaling pathway	15	1.18203	0.0014604	ENSG00000117020, ENSG00000152689, ENSG00000104365, ENSG00000133703, ENSG00000105851, ENSG00000131196, ENSG00000138814, ENSG00000177606, ENSG00000142208, ENSG00000155629, ENSG00000166501, ENSG00000070190, ENSG00000109320, ENSG00000174775, ENSG00000142867	392	75	5085	2.59439	0.22793	0.22793	1.77909
KEGG_PATHWAY	hsa04722:Neurotrophin signaling pathway	20	1.57604	0.00266517	ENSG00000117020, ENSG00000104365, ENSG00000111252, ENSG00000179295, ENSG00000133703, ENSG00000105851, ENSG00000185950, ENSG00000109458, ENSG00000198001, ENSG00000185652, ENSG00000134308, ENSG00000177606, ENSG00000171791, ENSG00000142208, ENSG00000134259, ENSG00000072133, ENSG00000128245, ENSG00000109320, ENSG00000137764, ENSG00000174775	392	124	5085	2.09225	0.376474	0.210364	3.22483
KEGG_PATHWAY	hsa04210:Apoptosis	15	1.18203	0.0060427	ENSG00000117020, ENSG00000104365, ENSG00000160049, ENSG00000105851, ENSG00000026103, ENSG00000165806, ENSG00000198001, ENSG00000138814, ENSG00000171791, ENSG00000142208, ENSG00000134259, ENSG00000142875, ENSG00000109320, ENSG00000005249, ENSG00000127191	392	87	5085	2.23654	0.657952	0.300648	7.17434
KEGG_PATHWAY	hsa04080:Neuroactive ligand-receptor interaction	32	2.52167	0.00685417	ENSG00000182687, ENSG00000180210, ENSG00000109738, ENSG00000180616, ENSG00000171517, ENSG00000185231, ENSG00000182771, ENSG00000151090, ENSG00000109158, ENSG00000183454, ENSG00000164129, ENSG00000164128, ENSG00000168412, ENSG00000112164, ENSG00000176136, ENSG00000166148, ENSG00000134200, ENSG00000112038, ENSG00000168398, ENSG00000120251, ENSG00000100739, ENSG00000115353, ENSG00000169836, ENSG0000…	392	256	5085	1.62149	0.703991	0.262391	8.1009
KEGG_PATHWAY	hsa05221:Acute myeloid leukemia	11	0.866824	0.0119107	ENSG00000117020, ENSG00000104365, ENSG00000138795, ENSG00000142208, ENSG00000112033, ENSG00000133703, ENSG00000159216, ENSG00000105851, ENSG00000109320, ENSG00000174775, ENSG00000187840	392	58	5085	2.4602	0.880071	0.345688	13.6858
KEGG_PATHWAY	hsa04914:Progesterone-mediated oocyte maturation	14	1.10323	0.0134119	ENSG00000170312, ENSG00000117020, ENSG00000080824, ENSG00000142208, ENSG00000142875, ENSG00000155897, ENSG00000072133, ENSG00000133703, ENSG00000105851, ENSG00000140443, ENSG00000166851, ENSG00000164109, ENSG00000172572, ENSG00000164162	392	86	5085	2.11171	0.908368	0.328559	15.2828
KEGG_PATHWAY	hsa05215:Prostate cancer	14	1.10323	0.0175804	ENSG00000117020, ENSG00000080824, ENSG00000145431, ENSG00000138795, ENSG00000104365, ENSG00000171791, ENSG00000142208, ENSG00000133703, ENSG00000105851, ENSG00000077782, ENSG00000140443, ENSG00000109320, ENSG00000111276, ENSG00000174775	392	89	5085	2.04053	0.956691	0.361406	19.5761
KEGG_PATHWAY	hsa05220:Chronic myeloid leukemia	12	0.945626	0.027	ENSG00000117020, ENSG00000104365, ENSG00000179295, ENSG00000142208, ENSG00000166949, ENSG00000133703, ENSG00000159216, ENSG00000105851, ENSG00000109320, ENSG00000111276, ENSG00000159692, ENSG00000174775	392	75	5085	2.07551	0.99213	0.454247	28.5518
KEGG_PATHWAY	hsa05200:Pathways in cancer	36	2.83688	0.0270253	ENSG00000080824, ENSG00000165731, ENSG00000118972, ENSG00000138795, ENSG00000091128, ENSG00000104365, ENSG00000166949, ENSG00000105851, ENSG00000077782, ENSG00000026103, ENSG00000159692, ENSG00000188064, ENSG00000089685, ENSG00000177606, ENSG00000171791, ENSG00000166501, ENSG00000140443, ENSG00000091483, ENSG00000078579, ENSG00000172379, ENSG00000174775, ENSG00000164161, ENSG00000091136, ENSG0000…	392	328	5085	1.42375	0.992166	0.416559	28.5746
KEGG_PATHWAY	hsa04110:Cell cycle	17	1.33964	0.0289492	ENSG00000077935, ENSG00000118971, ENSG00000166949, ENSG00000085840, ENSG00000112742, ENSG00000118007, ENSG00000123080, ENSG00000170312, ENSG00000134308, ENSG00000128245, ENSG00000133740, ENSG00000132646, ENSG00000112118, ENSG00000164109, ENSG00000111276, ENSG00000166851, ENSG00000164162	392	125	5085	1.76418	0.994481	0.405458	30.2902
KEGG_PATHWAY	hsa00380:Tryptophan metabolism	8	0.630418	0.0306953	ENSG00000138796, ENSG00000151790, ENSG00000197444, ENSG00000140105, ENSG00000116874, ENSG00000129673, ENSG00000121691, ENSG00000129167	392	40	5085	2.59439	0.995987	0.394472	31.8143
KEGG_PATHWAY	hsa04720:Long-term potentiation	11	0.866824	0.0335553	ENSG00000138814, ENSG00000120251, ENSG00000151067, ENSG00000155897, ENSG00000142875, ENSG00000072133, ENSG00000133703, ENSG00000058272, ENSG00000166501, ENSG00000183454, ENSG00000174775	392	68	5085	2.0984	0.997621	0.39555	34.2447
KEGG_PATHWAY	hsa04540:Gap junction	13	1.02443	0.038505	ENSG00000141551, ENSG00000170312, ENSG00000145431, ENSG00000061918, ENSG00000176014, ENSG00000142875, ENSG00000155897, ENSG00000133703, ENSG00000185532, ENSG00000166501, ENSG00000137764, ENSG00000174775, ENSG00000164116	392	89	5085	1.89478	0.999041	0.414108	38.2638
KEGG_PATHWAY	hsa05218:Melanoma	11	0.866824	0.0434872	ENSG00000117020, ENSG00000145431, ENSG00000118972, ENSG00000142208, ENSG00000111241, ENSG00000133703, ENSG00000105851, ENSG00000077782, ENSG00000140443, ENSG00000078579, ENSG00000174775	392	71	5085	2.00974	0.999618	0.429998	42.0802
KEGG_PATHWAY	hsa00230:Purine metabolism	19	1.49724	0.0447091	ENSG00000177700, ENSG00000186184, ENSG00000138185, ENSG00000155897, ENSG00000138735, ENSG00000101911, ENSG00000101868, ENSG00000187097, ENSG00000138801, ENSG00000198931, ENSG00000132664, ENSG00000171453, ENSG00000137198, ENSG00000061918, ENSG00000035687, ENSG00000185100, ENSG00000172572, ENSG00000197217, ENSG00000164116	392	153	5085	1.61089	0.999695	0.417091	42.9825
KEGG_PATHWAY	hsa05222:Small cell lung cancer	12	0.945626	0.0553983	ENSG00000117020, ENSG00000104365, ENSG00000171791, ENSG00000091128, ENSG00000142208, ENSG00000077092, ENSG00000131323, ENSG00000105851, ENSG00000109320, ENSG00000111276, ENSG00000127191, ENSG00000091136	392	84	5085	1.85313	0.999958	0.46766	50.3428
KEGG_PATHWAY	hsa00600:Sphingolipid metabolism	7	0.551615	0.0749009	ENSG00000119537, ENSG00000198964, ENSG00000164023, ENSG00000118276, ENSG00000128242, ENSG00000100422, ENSG00000176170	392	39	5085	2.3283	0.999999	0.555409	61.5679
KEGG_PATHWAY	hsa04114:Oocyte meiosis	14	1.10323	0.0777693	ENSG00000170312, ENSG00000138814, ENSG00000077935, ENSG00000134308, ENSG00000139151, ENSG00000142875, ENSG00000155897, ENSG00000072133, ENSG00000128245, ENSG00000140443, ENSG00000078304, ENSG00000166851, ENSG00000164109, ENSG00000164162	392	110	5085	1.65097	0.999999	0.548918	63.0063
KEGG_PATHWAY	hsa04730:Long-term depression	10	0.788022	0.0801205	ENSG00000138308, ENSG00000120251, ENSG00000061918, ENSG00000185532, ENSG00000133703, ENSG00000128266, ENSG00000140443, ENSG00000166501, ENSG00000174775, ENSG00000164116	392	69	5085	1.87999	1	0.54067	64.1482
KEGG_PATHWAY	hsa04010:MAPK signaling pathway	28	2.20646	0.0825302	ENSG00000006116, ENSG00000118972, ENSG00000138308, ENSG00000104365, ENSG00000077782, ENSG00000026103, ENSG00000177606, ENSG00000142875, ENSG00000109270, ENSG00000166501, ENSG00000078579, ENSG00000174775, ENSG00000127191, ENSG00000117020, ENSG00000152689, ENSG00000151067, ENSG00000111241, ENSG00000133703, ENSG00000089022, ENSG00000185652, ENSG00000109756, ENSG00000138814, ENSG00000142208, ENSG0000…	392	267	5085	1.36035	1	0.533408	65.2849
KEGG_PATHWAY	hsa05211:Renal cell carcinoma	10	0.788022	0.0860431	ENSG00000117020, ENSG00000177606, ENSG00000179295, ENSG00000142208, ENSG00000133703, ENSG00000105851, ENSG00000091483, ENSG00000109458, ENSG00000172379, ENSG00000174775	392	70	5085	1.85313	1	0.531554	66.8827
KEGG_PATHWAY	hsa04510:Focal adhesion	22	1.73365	0.0903636	ENSG00000117020, ENSG00000138964, ENSG00000118971, ENSG00000091128, ENSG00000110799, ENSG00000077943, ENSG00000105851, ENSG00000132470, ENSG00000145431, ENSG00000177606, ENSG00000171791, ENSG00000142208, ENSG00000188677, ENSG00000058272, ENSG00000077522, ENSG00000140443, ENSG00000166501, ENSG00000164692, ENSG00000102755, ENSG00000186340, ENSG00000174775, ENSG00000091136	392	201	5085	1.41981	1	0.533262	68.7552
KEGG_PATHWAY	hsa04960:Aldosterone-regulated sodium reabsorption	7	0.551615	0.0909369	ENSG00000133703, ENSG00000105851, ENSG00000185950, ENSG00000166501, ENSG00000168447, ENSG00000151623, ENSG00000166828	392	41	5085	2.21472	1	0.519875	68.9962
KEGG_PATHWAY	hsa00970:Aminoacyl-tRNA biosynthesis	7	0.551615	0.0909369	ENSG00000145982, ENSG00000109618, ENSG00000125821, ENSG00000103356, ENSG00000140105, ENSG00000106105, ENSG00000116874	392	41	5085	2.21472	1	0.519875	68.9962
KEGG_PATHWAY	hsa04910:Insulin signaling pathway	16	1.26084	0.0931844	ENSG00000117020, ENSG00000104365, ENSG00000133703, ENSG00000105851, ENSG00000185950, ENSG00000119938, ENSG00000187840, ENSG00000151247, ENSG00000142208, ENSG00000180008, ENSG00000142875, ENSG00000111713, ENSG00000182473, ENSG00000005249, ENSG00000174775, ENSG00000172572	392	135	5085	1.53741	1	0.513926	69.9247
